# Supplementary material for: Evolution of Rosaceae Plastomes Highlights Unique Cerasus Diversification and Independent Origins of Fruiting Cherry
Source: Front Plant Sci. 2021 Nov 19;12:736053. doi: 10.3389/fpls.2021.736053 (PMC8639594; doi:10.3389/fpls.2021.736053)
Supplement: Supplementary file 2 [file Data_Sheet_2.xlsx]

## Sheet: Supplementary Table 4
Supplementary Table 4 The detailed information of the nucleotide contents and genome annotation of 124 plastomes
Species	Code	Genome size (bp)	Nucleotide content							Genome annotation										Overlapping length between ycf1-fragment and ndhF (bp)	Overlapping length between psbC and psbD (sequence)*	The length of rps19-fragment gene	The length of atpF gene (including introns)	The total length of rps19-fragment and atpF genes	Additional descripts
			A	T	G	C	N%	(A+T)%	(G+C)%	intron	exon	gene	unique gene	Protein-conding gene	unique Protein-conding gene	rRNA	unique rRNA	tRNA	unique tRNA
Subfamily Amygdaloideae
Tribe Amygdaleae
Prunus subg. Cerasus (True cherry)
Prunus pseudocerasus	CBJ3	157859	49161	50665	28401	29546	0.0005	0.6324	0.3671	27	50	132	115	87	81	8	4	37	30	173	53 bp (atgaaaaccttatattccctgaggaggttctaccccgtggaaacgctctttaa)	182	1302	1484
	CMZ5	157932	48945	50436	28369	29516	0.0042	0.6293	0.3665	27	50	132	115	87	81	8	4	37	30	12	53 bp (atgaaaaccttatattccctgaggaggttctaccccgtggaaacgctctttaa)	182	1302	1484
	CQX14	157936	48605	50092	28289	29445	0.0095	0.6249	0.3656	27	50	132	115	87	81	8	4	37	30	27	53 bp (atgaaaaccttatattccctgaggaggttctaccccgtggaaacgctctttaa)	182	1302	1484
	CPZ2	157719	48977	50481	28349	29503	0.0026	0.6306	0.3668	27	50	132	115	87	81	8	4	37	30	12	53 bp (atgaaaaccttatattccctgaggaggttctaccccgtggaaacgctctttaa)	182	1302	1484
	CSM139	157945	48511	49999	28289	29422	0.0109	0.6237	0.3654	27	50	132	115	87	81	8	4	37	30	27	53 bp (atgaaaaccttatattccctgaggaggttctaccccgtggaaacgctctttaa)	182	1302	1484
	CXC1	157741	48928	50446	28346	29500	0.0033	0.63	0.3667	27	50	132	115	87	81	8	4	37	30	12	53 bp (atgaaaaccttatattccctgaggaggttctaccccgtggaaacgctctttaa)	182	1302	1484
	CYA	157958	48995	50471	28367	29516	0.0039	0.6297	0.3664	27	50	132	115	87	81	8	4	37	30	27	53 bp (atgaaaaccttatattccctgaggaggttctaccccgtggaaacgctctttaa)	182	1302	1484
	CHaZ310	157942	48819	50285	28347	29487	0.0064	0.6275	0.3662	27	50	132	115	87	81	8	4	37	30	27	53 bp (atgaaaaccttatattccctgaggaggttctaccccgtggaaacgctctttaa)	182	1302	1484
	CZaZ1	157857	49062	50538	28378	29519	0.0023	0.631	0.3668	27	50	132	115	87	81	8	4	37	30	12	53 bp (atgaaaaccttatattccctgaggaggttctaccccgtggaaacgctctttaa)	175	1302	1477
	CLuY1	157934	48998	50495	28374	29518	0.0035	0.63	0.3666	27	50	132	115	87	81	8	4	37	30	12	53 bp (atgaaaaccttatattccctgaggaggttctaccccgtggaaacgctctttaa)	182	1302	1484
	CAQ384	157859	49159	50665	28403	29546	0.0005	0.6324	0.3671	27	50	132	115	87	81	8	4	37	30	173	53 bp (atgaaaaccttatattccctgaggaggttctaccccgtggaaacgctctttaa)	182	1302	1484
	WBZ3	158006	48867	50359	28325	29488	0.0061	0.628	0.3659	27	50	132	115	87	81	8	4	37	30	17	53 bp (atgaaaaccttatattccctgaggaggttctaccccgtggaaacgctctttaa)	182	1300	1482
	WBZ4	158060	49089	50618	28397	29556	0.0025	0.6308	0.3667	27	50	132	115	87	81	8	4	37	30	17	53 bp (atgaaaaccttatattccctgaggaggttctaccccgtggaaacgctctttaa)	182	1300	1482
	WBZ5	157977	48783	50242	28316	29490	0.0073	0.6268	0.3659	27	50	132	115	87	81	8	4	37	30	17	53 bp (atgaaaaccttatattccctgaggaggttctaccccgtggaaacgctctttaa)	182	1300	1482
	WGX12	157925	48719	50192	28313	29475	0.0078	0.6263	0.3659	27	50	132	115	87	81	8	4	37	30	27	53 bp (atgaaaaccttatattccctgaggaggttctaccccgtggaaacgctctttaa)	182	1302	1484
	WGX18	157917	48724	50236	28345	29493	0.0071	0.6267	0.3663	27	50	132	115	87	81	8	4	37	30	83	53 bp (atgaaaaccttatattccctgaggaggttctaccccgtggaaacgctctttaa)	182	1302	1484
	WQX6	157955	48783	50239	28337	29485	0.007	0.6269	0.3661	27	50	132	115	87	81	8	4	37	30	27	53 bp (atgaaaaccttatattccctgaggaggttctaccccgtggaaacgctctttaa)	182	1302	1484
	WQX9	157929	48642	50092	28282	29433	0.0094	0.6252	0.3654	27	50	132	115	87	81	8	4	37	30	27	53 bp (atgaaaaccttatattccctgaggaggttctaccccgtggaaacgctctttaa)	182	1302	1484
	WQX10	157871	49021	50481	28375	29518	0.003	0.6303	0.3667	27	50	132	115	87	81	8	4	37	30	27	53 bp (atgaaaaccttatattccctgaggaggttctaccccgtggaaacgctctttaa)	182	1302	1484
	WSM131	157915	48943	50428	28378	29525	0.0041	0.6293	0.3667	27	50	132	115	87	81	8	4	37	30	27	53 bp (atgaaaaccttatattccctgaggaggttctaccccgtggaaacgctctttaa)	182	1302	1484
	WSM137	157883	49164	50670	28406	29555	0.0006	0.6323	0.3671	27	50	132	115	87	81	8	4	37	30	173	53 bp (atgaaaaccttatattccctgaggaggttctaccccgtggaaacgctctttaa)	182	1301	1483
	WSM140	157906	48963	50453	28368	29514	0.0039	0.6296	0.3666	27	50	132	115	87	81	8	4	37	30	27	53 bp (atgaaaaccttatattccctgaggaggttctaccccgtggaaacgctctttaa)	182	1302	1484
	WTL2	157933	48931	50426	28371	29519	0.0043	0.6291	0.3665	27	50	132	115	87	81	8	4	37	30	27	53 bp (atgaaaaccttatattccctgaggaggttctaccccgtggaaacgctctttaa)	182	1302	1484
	WTL4	157962	48862	50358	28373	29526	0.0053	0.6281	0.3665	27	50	132	115	87	81	8	4	37	30	27	53 bp (atgaaaaccttatattccctgaggaggttctaccccgtggaaacgctctttaa)	210	1302	1512
	WTL5	158024	48966	50501	28393	29543	0.0039	0.6294	0.3666	27	50	132	115	87	81	8	4	37	30	17	53 bp (atgaaaaccttatattccctgaggaggttctaccccgtggaaacgctctttaa)	182	1302	1484
	WTL7	157812	49129	50685	28365	29545	0.0006	0.6325	0.367	27	50	132	115	87	81	8	4	37	30	61	53 bp (atgaaaaccttatattccctgaggaggttctaccccgtggaaacgctctttaa)	182	1300	1482
	WTL9	157911	48936	50395	28357	29491	0.0046	0.629	0.3663	27	50	132	115	87	81	8	4	37	30	27	53 bp (atgaaaaccttatattccctgaggaggttctaccccgtggaaacgctctttaa)	182	1302	1484
	WZGM8	157950	49009	50483	28373	29518	0.0036	0.6299	0.3665	27	50	132	115	87	81	8	4	37	30	27	53 bp (atgaaaaccttatattccctgaggaggttctaccccgtggaaacgctctttaa)	182	1302	1484
	WZGM20	158002	49067	50560	28370	29542	0.0029	0.6305	0.3665	27	50	132	115	87	81	8	4	37	30	17	53 bp (atgaaaaccttatattccctgaggaggttctaccccgtggaaacgctctttaa)	182	1300	1482
	WZGM23	158015	48950	50464	28358	29536	0.0045	0.6291	0.3664	27	50	132	115	87	81	8	4	37	30	17	53 bp (atgaaaaccttatattccctgaggaggttctaccccgtggaaacgctctttaa)	182	1300	1482
	WML21	157924	48781	50226	28340	29479	0.007	0.6269	0.3661	27	50	132	115	87	81	8	4	37	30	27	53 bp (atgaaaaccttatattccctgaggaggttctaccccgtggaaacgctctttaa)	182	1302	1484
	WNG2	157882	49027	50497	28373	29519	0.003	0.6304	0.3667	27	50	132	115	87	81	8	4	37	30	27	53 bp (atgaaaaccttatattccctgaggaggttctaccccgtggaaacgctctttaa)	182	1302	1484
	WNG9	158042	48870	50346	28369	29505	0.0053	0.6282	0.3664	27	50	132	115	87	81	8	4	37	30	12	53 bp (atgaaaaccttatattccctgaggaggttctaccccgtggaaacgctctttaa)	225	1302	1527
	WNG10	157940	48891	50366	28369	29523	0.005	0.6284	0.3665	27	50	132	115	87	81	8	4	37	30	27	53 bp (atgaaaaccttatattccctgaggaggttctaccccgtggaaacgctctttaa)	182	1302	1484
	NC_030599.1	157834	49180	50679	28419	29556	0	0.6327	0.3673	27	50	132	115	87	81	8	4	37	30	12	53 bp (atgaaaaccttatattccctgaggaggttctaccccgtggaaacgctctttaa)	210	1302	1512
Prunus avium	‘Black Tartarian’	157829	49123	50702	28371	29547	0.0005	0.6325	0.367	27	50	132	115	87	81	8	4	37	30	24	53 bp (atgaaaaccttatattccctgaggaggttctaccccgtggaaacgctctttaa)	182	1299	1481
	‘Van’	157889	49163	50716	28374	29550	0.0005	0.6326	0.3669	27	50	132	115	87	81	8	4	37	30	24	53 bp (atgaaaaccttatattccctgaggaggttctaccccgtggaaacgctctttaa)	182	1297	1479
	Mazzard	157833	49122	50708	28370	29547	0.0005	0.6325	0.367	27	50	132	115	87	81	8	4	37	30	24	53 bp (atgaaaaccttatattccctgaggaggttctaccccgtggaaacgctctttaa)	182	1299	1481
Prunus fruticosa	ZFI3	158141	48826	50340	28267	29425	0.0081	0.6271	0.3648	27	50	132	115	87	81	8	4	37	30	24	53 bp (atgaaaaccttatattccctgaggaggttctaccccgtggaaacgctctttaa)	182	1302	1484
Prunus cerasus × Prunus canescens	‘Gisela5’	158202	49393	50892	28327	29504	0.0005	0.6339	0.3656	27	50	132	115	87	81	8	4	37	30	24	53 bp (atgaaaaccttatattccctgaggaggttctaccccgtggaaacgctctttaa)	182	1302	1484
Prunus mahaleb	ZFI4	157579	49053	50561	28347	29532	0.0005	0.6322	0.3673	27	50	132	115	87	81	8	4	37	30	15	53 bp (atgaaaaccttatattccctgaggaggttctaccccgtggaaacgctctttaa)	182	1299	1481
Prunus pusilliflora	YAU	157685	49071	50609	28374	29536	0.0006	0.6321	0.3673	27	50	132	115	87	81	8	4	37	30	12	53 bp (atgaaaaccttatattccctgaggaggttctaccccgtggaaacgctctttaa)	182	1301	1483
Prunus serrulata	KM2	157892	48647	50128	28310	29468	0.0085	0.6256	0.3659	27	50	132	115	87	81	8	4	37	30	83	53 bp (atgaaaaccttatattccctgaggaggttctaccccgtggaaacgctctttaa)	142	1302	1444
	ZY4	157927	48724	50163	28321	29469	0.0079	0.6262	0.3659	27	50	132	115	87	81	8	4	37	30	27	53 bp (atgaaaaccttatattccctgaggaggttctaccccgtggaaacgctctttaa)	182	1302	1484
	ZY4-1	157898	48760	50231	28342	29484	0.0068	0.6269	0.3662	27	50	132	115	87	81	8	4	37	30	27	53 bp (atgaaaaccttatattccctgaggaggttctaccccgtggaaacgctctttaa)	182	1300	1482
	ZY5	157963	49190	50708	28421	29556	0.0006	0.6324	0.367	27	50	132	115	87	81	8	4	37	30	173	53 bp (atgaaaaccttatattccctgaggaggttctaccccgtggaaacgctctttaa)	182	1302	1484
	YYT1	157902	49173	50681	28409	29553	0.0005	0.6324	0.3671	27	50	132	115	87	81	8	4	37	30	173	53 bp (atgaaaaccttatattccctgaggaggttctaccccgtggaaacgctctttaa)	182	1302	1484
Prunus serrulata var. spontanea	KP760073.1	157882	49203	50702	28421	29556	0	0.6328	0.3672	27	50	132	115	87	81	8	4	37	30	12	53 bp (atgaaaaccttatattccctgaggaggttctaccccgtggaaacgctctttaa)	195	1302	1497
Prunus serrulata var. lannesiana	YYT2	157866	49161	50657	28408	29554	0.0005	0.6323	0.3672	27	50	132	115	87	81	8	4	37	30	12	53 bp (atgaaaaccttatattccctgaggaggttctaccccgtggaaacgctctttaa)	182	1302	1484
Prunus conradinae	LD2	158014	48547	50038	28301	29442	0.0107	0.6239	0.3654	27	50	132	115	87	81	8	4	37	30	None	53 bp (atgaaaaccttatattccctgaggaggttctaccccgtggaaacgctctttaa)	182	1303	1485
	LD7	157901	48964	50455	28371	29530	0.0037	0.6296	0.3667	27	50	132	115	87	81	8	4	37	30	27	53 bp (atgaaaaccttatattccctgaggaggttctaccccgtggaaacgctctttaa)	182	1302	1484
	LD9	157852	48924	50429	28357	29529	0.0039	0.6294	0.3667	27	50	132	115	87	81	8	4	37	30	27	53 bp (atgaaaaccttatattccctgaggaggttctaccccgtggaaacgctctttaa)	186	1298	1484
	LD11	158167	48979	50466	28382	29536	0.0037	0.6296	0.3667	27	50	132	115	87	81	8	4	37	30	12	53 bp (atgaaaaccttatattccctgaggaggttctaccccgtggaaacgctctttaa)	243	1302	1545
	HaZ309	157923	49177	50679	28411	29570	0.0005	0.6323	0.3671	27	50	132	115	87	81	8	4	37	30	173	53 bp (atgaaaaccttatattccctgaggaggttctaccccgtggaaacgctctttaa)	182	1302	1484
	HaZ314	157837	49152	50644	28398	29557	0.0005	0.6323	0.3672	27	50	132	115	87	81	8	4	37	30	12	53 bp (atgaaaaccttatattccctgaggaggttctaccccgtggaaacgctctttaa)	182	1300	1482
	QLM2	157955	48965	50488	28362	29532	0.0038	0.6296	0.3665	27	50	132	115	87	81	8	4	37	30	83	53 bp (atgaaaaccttatattccctgaggaggttctaccccgtggaaacgctctttaa)	182	1301	1483
	QLM10	157991	48474	49892	28216	29376	0.0129	0.6226	0.3645	27	50	130	113	87	81	8	4	35	28	17	53 bp (atgaaaaccttatattccctgaggaggttctaccccgtggaaacgctctttaa)	182	1299	1481	trnQ-UUG (missing data), trnR-UCU (missing data)#
	BHH294	157992	48938	50420	28363	29502	0.0049	0.6289	0.3663	27	50	132	115	87	81	8	4	37	30	4	53 bp (atgaaaaccttatattccctgaggaggttctaccccgtggaaacgctctttaa)	182	1301	1483
	LGS4	158083	48852	50337	28354	29524	0.0064	0.6274	0.3661	27	50	132	115	87	81	8	4	37	30	12	53 bp (atgaaaaccttatattccctgaggaggttctaccccgtggaaacgctctttaa)	182	1302	1484
	KIB1	157881	49171	50670	28408	29546	0.0005	0.6324	0.3671	27	50	132	115	87	81	8	4	37	30	173	53 bp (atgaaaaccttatattccctgaggaggttctaccccgtggaaacgctctttaa)	182	1302	1484
	KM1	157864	49166	50663	28405	29544	0.0005	0.6324	0.3671	27	50	132	115	87	81	8	4	37	30	173	53 bp (atgaaaaccttatattccctgaggaggttctaccccgtggaaacgctctttaa)	182	1302	1484
	PD1-1	157868	49015	50516	28391	29541	0.0026	0.6305	0.367	27	50	132	115	87	81	8	4	37	30	27	53 bp (atgaaaaccttatattccctgaggaggttctaccccgtggaaacgctctttaa)	182	1302	1484
	PD2	157405	48749	50252	28311	29471	0.004	0.629	0.3671	27	50	132	115	87	81	8	4	37	30	27	53 bp (atgaaaaccttatattccctgaggaggttctaccccgtggaaacgctctttaa)	182	1302	1484
	SP6	157932	49181	50694	28406	29565	0.0005	0.6324	0.3671	27	50	132	115	87	81	8	4	37	30	12	53 bp (atgaaaaccttatattccctgaggaggttctaccccgtggaaacgctctttaa)	182	1303	1485
Prunus cerasoides	BHH4	157878	49159	50661	28416	29556	0.0005	0.6323	0.3672	27	50	132	115	87	81	8	4	37	30	173	53 bp (atgaaaaccttatattccctgaggaggttctaccccgtggaaacgctctttaa)	182	1302	1484
	KIB2	157865	49166	50665	28404	29544	0.0005	0.6324	0.3671	27	50	132	115	87	81	8	4	37	30	173	53 bp (atgaaaaccttatattccctgaggaggttctaccccgtggaaacgctctttaa)	182	1302	1484
	KIB3	157812	49126	50681	28371	29548	0.0005	0.6324	0.367	27	50	132	115	87	81	8	4	37	30	15	53 bp (atgaaaaccttatattccctgaggaggttctaccccgtggaaacgctctttaa)	182	1300	1482
	NC_035891.1	157685	49111	50670	28378	29526	0	0.6328	0.3672	27	50	132	115	87	81	8	4	37	30	27	53 bp (atgaaaaccttatattccctgaggaggttctaccccgtggaaacgctctttaa)	198	1300	1498
Prunus cerasoides var. rubea	KIB4	157879	49171	50668	28407	29547	0.0005	0.6324	0.3671	27	50	132	115	87	81	8	4	37	30	173	53 bp (atgaaaaccttatattccctgaggaggttctaccccgtggaaacgctctttaa)	182	1302	1484
Prunus campanulata	KIB5	157708	49074	50614	28373	29555	0.0006	0.6321	0.3673	27	50	132	115	87	81	8	4	37	30	27	53 bp (atgaaaaccttatattccctgaggaggttctaccccgtggaaacgctctttaa)	182	1301	1483
Prunus clarofolia	ML25	157939	48821	50309	28355	29495	0.0061	0.6276	0.3663	27	50	132	115	87	81	8	4	37	30	27	53 bp (atgaaaaccttatattccctgaggaggttctaccccgtggaaacgctctttaa)	182	1302	1484
	ML26	157932	48942	50429	28369	29515	0.0043	0.6292	0.3665	27	50	132	115	87	81	8	4	37	30	27	53 bp (atgaaaaccttatattccctgaggaggttctaccccgtggaaacgctctttaa)	182	1302	1484
	KIB6	157884	49174	50666	28409	29549	0.0005	0.6324	0.3671	27	50	132	115	87	81	8	4	37	30	173	53 bp (atgaaaaccttatattccctgaggaggttctaccccgtggaaacgctctttaa)	182	1302	1484
Prunus szechuanica	EMM10	157865	49146	50713	28372	29548	0.0005	0.6326	0.3669	27	50	132	115	87	81	8	4	37	30	173	53 bp (atgaaaaccttatattccctgaggaggttctaccccgtggaaacgctctttaa)	182	1299	1481
	JJM7	157859	49156	50660	28402	29555	0.0005	0.6323	0.3671	27	50	132	115	87	81	8	4	37	30	173	53 bp (atgaaaaccttatattccctgaggaggttctaccccgtggaaacgctctttaa)	182	1302	1484
	QLM12	157966	48991	50489	28362	29544	0.0037	0.6298	0.3666	27	50	132	115	87	81	8	4	37	30	17	53 bp (atgaaaaccttatattccctgaggaggttctaccccgtggaaacgctctttaa)	182	1299	1481
Prunus duclouxii	QLM8	157861	49036	50548	28395	29554	0.0021	0.6308	0.3671	27	50	132	115	87	81	8	4	37	30	84	53 bp (atgaaaaccttatattccctgaggaggttctaccccgtggaaacgctctttaa)	182	1300	1482
Prunus pleiocerasus	ML15	157840	49133	50687	28382	29552	0.0005	0.6324	0.367	27	50	132	115	87	81	8	4	37	30	61	53 bp (atgaaaaccttatattccctgaggaggttctaccccgtggaaacgctctttaa)	182	1300	1482
Prunus trichostoma	ML5	157829	49133	50685	28372	29553	0.0005	0.6324	0.367	27	50	132	115	87	81	8	4	37	30	61	53 bp (atgaaaaccttatattccctgaggaggttctaccccgtggaaacgctctttaa)	182	1300	1482
Prunus scopulorum	ML106	157911	48947	50422	28384	29528	0.004	0.6293	0.3667	27	50	132	115	87	81	8	4	37	30	27	53 bp (atgaaaaccttatattccctgaggaggttctaccccgtggaaacgctctttaa)	182	1302	1484
Prunus crataegifolia	JJM1	157778	49113	50660	28375	29544	0.0005	0.6324	0.3671	27	50	132	115	87	81	8	4	37	30	61	53 bp (atgaaaaccttatattccctgaggaggttctaccccgtggaaacgctctttaa)	182	1300	1482
Prunus maximowiczii	KP760071.1	157852	49181	50695	28427	29549	0	0.6327	0.3673	27	50	132	115	87	81	8	4	37	30	12	53 bp (atgaaaaccttatattccctgaggaggttctaccccgtggaaacgctctttaa)	225	1308	1533
Prunus tatsienensis	KD6	157807	49103	50708	28366	29544	0.0005	0.6325	0.367	27	50	132	115	87	81	8	4	37	30	15	53 bp (atgaaaaccttatattccctgaggaggttctaccccgtggaaacgctctttaa)	182	1309	1491
Prunus subhirtella	KP760075.1	157833	49167	50687	28407	29572	0	0.6327	0.3673	27	50	132	115	87	81	8	4	37	30	None	53 bp (atgaaaaccttatattccctgaggaggttctaccccgtggaaacgctctttaa)	189	1301	1490
Prunus yedoensis	YYT3	157868	48858	50353	28348	29530	0.0049	0.6284	0.3666	27	50	132	115	87	81	8	4	37	30	64	53 bp (atgaaaaccttatattccctgaggaggttctaccccgtggaaacgctctttaa)	189	1301	1490
	KU985054.1	157792	49154	50665	28402	29571	0	0.6326	0.3674	27	50	132	115	87	81	8	4	37	30	17	53 bp (atgaaaaccttatattccctgaggaggttctaccccgtggaaacgctctttaa)	189	1303	1492
Prunus discoidea	EMM1	157913	49117	50641	28389	29556	0.0013	0.6317	0.3669	27	50	132	115	87	81	8	4	37	30	17	53 bp (atgaaaaccttatattccctgaggaggttctaccccgtggaaacgctctttaa)	182	1300	1482
	EMM2	157978	49015	50522	28364	29538	0.0034	0.6301	0.3665	27	50	132	115	87	81	8	4	37	30	27	53 bp (atgaaaaccttatattccctgaggaggttctaccccgtggaaacgctctttaa)	182	1299	1481
	EMM4	157894	49068	50554	28373	29528	0.0023	0.6309	0.3667	27	50	132	115	87	81	8	4	37	30	17	53 bp (atgaaaaccttatattccctgaggaggttctaccccgtggaaacgctctttaa)	182	1299	1481
Prunus dolichadenia	JJM2	157874	49145	50707	28381	29555	0.0005	0.6325	0.367	27	50	132	115	87	81	8	4	37	30	173	53 bp (atgaaaaccttatattccctgaggaggttctaccccgtggaaacgctctttaa)	182	1301	1483
Prunus sp. 1	ZGM17	157993	48996	50500	28370	29532	0.0038	0.6297	0.3665	27	50	132	115	87	81	8	4	37	30	42	53 bp (atgaaaaccttatattccctgaggaggttctaccccgtggaaacgctctttaa)	182	1300	1482
Prunus sp. 2	QLM13	157974	49069	50584	28368	29545	0.0026	0.6308	0.3666	27	50	132	115	87	81	8	4	37	30	17	53 bp (atgaaaaccttatattccctgaggaggttctaccccgtggaaacgctctttaa)	182	1299	1481
Cerasus relatives
Prunus subg. Prunus
Microcerasus (Dwarf cherry)
Prunus humilis	NC_035880.1	158012	49133	50688	28302	29549	0	0.6317	0.3661	27	50	132	115	87	81	8	4	37	30	18	53 bp (atgaaaaccttatattccctgaggaggttctaccccgtggaaacgctctttaa)	192	1296	1488
Prunus tomentosa	SMG211	157336	48875	50468	28316	29591	0.0005	0.6314	0.368	27	50	132	115	87	81	8	4	37	30	24	53 bp (atgaaaaccttatattccctgaggaggttctaccccgtggaaacgctctttaa)	182	1300	1482
	LD501	157107	48779	50377	28296	29567	0.0006	0.6311	0.3683	27	50	132	115	87	81	8	4	37	30	24	53 bp (atgaaaaccttatattccctgaggaggttctaccccgtggaaacgctctttaa)	182	1300	1482
	ZFI207	157170	48810	50407	28295	29570	0.0006	0.6313	0.3682	27	50	132	115	87	81	8	4	37	30	24	53 bp (atgaaaaccttatattccctgaggaggttctaccccgtggaaacgctctttaa)	182	1300	1482
	MF624726.1	158356	49199	50798	28539	29820	0	0.6315	0.3685	27	50	132	115	87	81	8	4	37	30	24	53 bp (atgaaaaccttatattccctgaggaggttctaccccgtggaaacgctctttaa)	187	1300	1487
Prunus tianshanica	TSM3	157663	49031	50590	28341	29614	0.0006	0.6319	0.3676	27	50	132	115	87	81	8	4	37	30	24	53 bp (atgaaaaccttatattccctgaggaggttctaccccgtggaaacgctctttaa)	182	1299	1481
Prunus subg. Prunus
Prunus cerasifera	SRR4036106	157904	49098	50590	28372	29614	0.0015	0.6313	0.3672	27	50	132	115	87	81	8	4	37	30	24	53 bp (atgaaaaccttatattccctgaggaggttctaccccgtggaaacgctctttaa)	182	1298	1480
Prunus subg. Armeniaca
Prunus mume	KF765450.1	157712	49077	50681	28374	29580	0	0.6325	0.3675	27	50	132	115	87	81	8	4	37	30	23	53 bp (atgaaaaccttatattccctgaggaggttctaccccgtggaaacgctctttaa)	204	1304	1508
Prunus subg. Amygdalus
Prunus kansuensis	NC_023956.1	157736	49062	50695	28369	29610	0	0.6324	0.3676	27	50	132	115	87	81	8	4	37	30	15	53 bp (atgaaaaccttatattccctgaggaggttctaccccgtggaaacgctctttaa)	183	1302	1485
Prunus persica	HQ336405	157790	49092	50695	28378	29625	0	0.6324	0.3676	27	50	132	115	87	81	8	4	37	30	15	53 bp (atgaaaaccttatattccctgaggaggttctaccccgtggaaacgctctttaa)	183	1301	1484
Prunus dulcis	NC_034696.1	157723	49098	50627	28393	29603	0	0.6323	0.3677	27	50	132	115	87	81	8	4	37	30	18	53 bp (atgaaaaccttatattccctgaggaggttctaccccgtggaaacgctctttaa)	261	1299	1560
Prunus subg. Padus
Prunus padus	KP760072.1	158955	49668	51125	28476	29686	0	0.6341	0.3659	27	50	132	115	87	81	8	4	37	30	24	53 bp (atgaaaaccttatattccctgaggaggttctaccccgtggaaacgctctttaa)	48	1352	1400
Prunus serotina	NC_036133.1	158778	49551	51070	28488	29669	0	0.6337	0.3663	27	50	132	115	87	81	8	4	37	30	6	53 bp (atgaaaaccttatattccctgaggaggttctaccccgtggaaacgctctttaa)	147	1326	1473
Prunus subg. Maddenia
Prunus hypoleuca	KT766059.1	158084	49309	50866	28357	29552	0	0.6337	0.3663	27	50	132	115	87	81	8	4	37	30	64	53 bp (atgaaaaccttatattccctgaggaggttctaccccgtggaaacgctctttaa)	187	1370	1557
Tribe Exochordeae
Prinsepia utilis	KC571835.1	156328	48541	50118	28211	29448	0	0.6311	0.3688	27	50	132	115	87	81	8	4	37	30	15	53 bp (atgaaaaccttatattccctgaggaggttctaccccgtggaaacgctctttaa)	183	1290	1473
Tribe Spiraeeae
Pentactina rupicola	JQ041763.1	156612	48878	50108	28264	29362	0	0.632	0.368	26	49	132	115	87	81	8	4	37	30	70	53 bp (atgaaaaccttatattccctgaggaggttctaccccgtggaaacgctctttaa)	168	1286	1454	clpP contained only one intron.
Tribe Maleae
Chaenomeles japonica	KT932966.1	160088	50198	51370	28685	29832	0	0.6345	0.3655	27	50	132	115	87	81	8	4	37	30	21	53 bp (atgaaaaccttatattccctgaggaggttctaccccgtggaaacgctctttaa)	129	1284	1413
Docynia delavayi	KX499860.1	159428	49810	51172	28653	29793	0	0.6334	0.3666	27	50	132	115	87	81	8	4	37	30	21	53 bp (atgaaaaccttatattccctgaggaggttctaccccgtggaaacgctctttaa)	129	1283	1412
Cydonia oblonga	KX499857.1	159609	49873	51325	28624	29787	0	0.634	0.366	27	50	131	114	86	80	8	4	37	30	21	53 bp (atgaaaaccttatattccctgaggaggttctaccccgtggaaacgctctttaa)	0	1284	1284	rps19-fragment genes was lost.
Sorbus torminalis	NC_033975.1	160390	50279	51598	28662	29851	0	0.6352	0.3648	27	50	132	115	87	81	8	4	37	30	21	53 bp (atgaaaaccttatattccctgaggaggttctaccccgtggaaacgctctttaa)	129	1290	1419
Malus baccata	KX499859.1	160163	50183	51466	28682	29832	0	0.6347	0.3653	27	50	132	115	87	81	8	4	37	30	21	53 bp (atgaaaaccttatattccctgaggaggttctaccccgtggaaacgctctttaa)	150	1286	1436
Malus domestica	KY818915.1	160068	50130	51429	28677	29832	0	0.6345	0.3655	27	50	132	115	87	81	8	4	37	30	21	53 bp (atgaaaaccttatattccctgaggaggttctaccccgtggaaacgctctttaa)	138	1287	1425
Pyrus bretschneideri	KX450881.1	159922	50056	51371	28675	29820	0	0.6342	0.3658	27	50	132	115	87	81	8	4	37	30	21	53 bp (atgaaaaccttatattccctgaggaggttctaccccgtggaaacgctctttaa)	123	1287	1410
Pyrus pyrifolia	AP012207.1	159922	50057	51371	28674	29820	0	0.6342	0.3658	27	50	132	115	87	81	8	4	37	30	21	53 bp (atgaaaaccttatattccctgaggaggttctaccccgtggaaacgctctttaa)	123	1287	1410
Pyrus communis	KX450879.1	159901	50054	51389	28648	29810	0	0.6344	0.3656	27	50	132	115	87	81	8	4	37	30	21	53 bp (atgaaaaccttatattccctgaggaggttctaccccgtggaaacgctctttaa)	123	1287	1410
Eriobotrya japonica	NC_034639.1	159137	49670	51029	28628	29810	0	0.6328	0.3672	27	50	132	115	87	81	8	4	37	30	21	53 bp (atgaaaaccttatattccctgaggaggttctaccccgtggaaacgctctttaa)	138	1287	1425
Subfamily Rosoideae
Fragaria vesca	JF345175.1	155691	48400	49354	28447	29490	0	0.6279	0.3721	26	48	131	114	86	80	8	4	37	30	None	53 bp (atgaaaaccttatattccctgaggaggttctaccccgtggaaacgctctttaa)	0	555	555	rps19-fragment genes was lost. atpF had no intron.
Potentilla micrantha	HG931056.1	154959	48020	49134	28282	29336	0.0012	0.627	0.3718	26	48	131	114	86	80	8	4	37	30	None	53 bp (atgaaaaccttatattccctgaggaggttctaccccgtggaaacgctctttaa)	0	555	555	rps19-fragment genes was lost. atpF had no intron.
Rosa roxburghii	NC_032038.1	156749	48581	49805	28692	29671	0	0.6277	0.3723	26	48	131	113	86	80	8	4	37	30	None	53 bp (atgaaaaccttatattccctgaggaggttctaccccgtggaaacgctctttaa)	0	555	555	rps19-fragment genes was lost. atpF had no intron.
Outgroups
Morus mongolica	KM491711.2	158459	49734	51214	28250	29261	0	0.6371	0.3629	27	50	131	114	86	80	8	4	37	30	107	53 bp (atgaaaaccttatattccctgaggaggttctaccccgtggaaacgctctttaa)	0	1304	1304	rps19-fragment genes was lost.
Ziziphus jujuba	NC_030299.1	161466	50387	51683	29213	30183	0	0.6321	0.3679	27	50	132	115	87	81	8	4	37	30	None	53 bp (atgaaaaccttatattccctgaggaggttctaccccgtggaaacgctctttaa)	108	1302	1410
Elaeagnus macrophylla	KP211788.1	152224	47227	48519	27767	28711	0	0.629	0.371	27	50	131	114	86	80	8	4	37	30	23	53 bp (atgaaaaccttatattccctgaggaggttctaccacgtggaaacgctctttaa)	0	1279	1279	rps19-fragment genes was lost.

## Sheet: Supplementary Table 10 
Supplementary Table 10 The effects of 9290 SNP mutations on 80 protein-coding genes in Rosaceae plastomes
Code	Sites	Gene	Reference	Alternative	Effects	Level
1	367	psbA	T	C	synonymous variant	low
2	373	psbA	T	G	synonymous variant	low
3	375	psbA	T	C	missense variant	moderate
4	379	psbA	T	C	synonymous variant	low
5	381	psbA	G	T	missense variant	moderate
6	387	psbA	C	G	missense variant	moderate
7	389	psbA	A	C	missense variant	moderate
8	399	psbA	G	A	synonymous variant	low
9	400	psbA	A	G	synonymous variant	low
10	418	psbA	A	G	synonymous variant	low
11	445	psbA	A	G	synonymous variant	low
12	451	psbA	G	A	synonymous variant	low
13	457	psbA	G	C	synonymous variant	low
14	463	psbA	A	G	synonymous variant	low
15	496	psbA	C	T	synonymous variant	low
16	511	psbA	A	G	synonymous variant	low
17	517	psbA	A	G	synonymous variant	low
18	529	psbA	A	T	synonymous variant	low
19	558	psbA	T	C	missense variant	moderate
20	571	psbA	A	G	synonymous variant	low
21	583	psbA	T	G	synonymous variant	low
22	585	psbA	C	T	missense variant	moderate
23	603	psbA	G	A	synonymous variant	low
24	610	psbA	A	G	synonymous variant	low
25	625	psbA	G	A	synonymous variant	low
26	679	psbA	T	G	synonymous variant	low
27	685	psbA	A	G	synonymous variant	low
28	688	psbA	A	G	synonymous variant	low
29	691	psbA	G	A	synonymous variant	low
30	698	psbA	T	C	missense variant	moderate
31	775	psbA	G	A	synonymous variant	low
32	778	psbA	C	A	synonymous variant	low
33	781	psbA	A	G	synonymous variant	low
34	802	psbA	G	A	synonymous variant	low
35	805	psbA	G	A	synonymous variant	low
36	808	psbA	G	A	synonymous variant	low
37	817	psbA	A	G	synonymous variant	low
38	820	psbA	T	C	synonymous variant	low
39	823	psbA	G	A	synonymous variant	low
40	828	psbA	A	G	synonymous variant	low
41	850	psbA	G	A	synonymous variant	low
42	859	psbA	C	T	synonymous variant	low
43	862	psbA	A	G	synonymous variant	low
44	862	psbA	A	C	synonymous variant	low
45	883	psbA	G	A	synonymous variant	low
46	895	psbA	G	A	synonymous variant	low
47	907	psbA	G	A	synonymous variant	low
48	943	psbA	A	G	synonymous variant	low
49	946	psbA	T	G	synonymous variant	low
50	979	psbA	A	C	synonymous variant	low
51	1006	psbA	G	A	synonymous variant	low
52	1017	psbA	G	A	synonymous variant	low
53	1027	psbA	A	T	synonymous variant	low
54	1048	psbA	G	A	synonymous variant	low
55	1084	psbA	T	A	synonymous variant	low
56	1086	psbA	G	A	synonymous variant	low
57	1087	psbA	T	C	synonymous variant	low
58	1093	psbA	A	C	synonymous variant	low
59	1096	psbA	A	G	synonymous variant	low
60	1102	psbA	A	G	synonymous variant	low
61	1105	psbA	G	A	synonymous variant	low
62	1108	psbA	T	C	synonymous variant	low
63	1114	psbA	T	C	synonymous variant	low
64	1123	psbA	G	A	synonymous variant	low
65	1129	psbA	C	T	synonymous variant	low
66	1141	psbA	C	A	synonymous variant	low
67	1141	psbA	C	T	synonymous variant	low
68	1159	psbA	T	G	synonymous variant	low
69	1168	psbA	A	C	synonymous variant	low
70	1171	psbA	G	A	synonymous variant	low
71	1174	psbA	A	G	synonymous variant	low
72	1177	psbA	A	G	synonymous variant	low
73	1189	psbA	A	G	synonymous variant	low
74	1195	psbA	A	G	synonymous variant	low
75	1207	psbA	A	G	synonymous variant	low
76	1234	psbA	A	C	synonymous variant	low
77	1255	psbA	T	C	synonymous variant	low
78	1258	psbA	A	C	synonymous variant	low
79	1354	psbA	A	G	synonymous variant	low
80	1369	psbA	G	A	synonymous variant	low
81	1402	psbA	G	A	synonymous variant	low
82	1417	psbA	T	G	synonymous variant	low
83	1993	matK	T	C	splice region variant & stop retained variant	low
84	1995	matK	T	G	missense variant	moderate
85	1998	matK	A	G	synonymous variant	low
86	2000	matK	A	G	missense variant	moderate
87	2000	matK	A	C	missense variant	moderate
88	2004	matK	G	A	synonymous variant	low
89	2006	matK	T	C	missense variant	moderate
90	2013	matK	A	G	synonymous variant	low
91	2015	matK	T	C	missense variant	moderate
92	2019	matK	G	A	synonymous variant	low
93	2020	matK	C	T	missense variant	moderate
94	2022	matK	A	C	missense variant	moderate
95	2030	matK	C	T	missense variant	moderate
96	2030	matK	C	A	missense variant	moderate
97	2031	matK	C	A	missense variant	moderate
98	2042	matK	T	C	missense variant	moderate
99	2043	matK	C	T	synonymous variant	low
100	2043	matK	C	G	synonymous variant	low
101	2044	matK	C	G	missense variant	moderate
102	2046	matK	A	C	synonymous variant	low
103	2055	matK	A	C	missense variant	moderate
104	2057	matK	A	G	missense variant	moderate
105	2058	matK	T	C	synonymous variant	low
106	2059	matK	T	C	missense variant	moderate
107	2060	matK	T	G	missense variant	moderate
108	2061	matK	C	A	missense variant	moderate
109	2064	matK	A	C	missense variant	moderate
110	2064	matK	A	T	missense variant	moderate
111	2065	matK	A	G	missense variant	moderate
112	2071	matK	T	G	missense variant	moderate
113	2078	matK	C	T	missense variant	moderate
114	2079	matK	T	C	synonymous variant	low
115	2085	matK	G	A	synonymous variant	low
116	2090	matK	T	C	missense variant	moderate
117	2090	matK	T	G	missense variant	moderate
118	2091	matK	C	T	synonymous variant	low
119	2095	matK	G	T	missense variant	moderate
120	2095	matK	G	A	missense variant	moderate
121	2098	matK	A	C	missense variant	moderate
122	2098	matK	A	T	missense variant	moderate
123	2099	matK	G	A	missense variant	moderate
124	2100	matK	A	G	synonymous variant	low
125	2103	matK	C	A	missense variant	moderate
126	2104	matK	T	C	missense variant	moderate
127	2115	matK	C	G	synonymous variant	low
128	2127	matK	T	G	missense variant	moderate
129	2127	matK	T	A	missense variant	moderate
130	2130	matK	C	T	synonymous variant	low
131	2136	matK	T	C	synonymous variant	low
132	2140	matK	G	T	missense variant	moderate
133	2141	matK	A	G	missense variant	moderate
134	2142	matK	A	G	synonymous variant	low
135	2145	matK	T	G	missense variant	moderate
136	2145	matK	T	C	synonymous variant	low
137	2154	matK	C	T	synonymous variant	low
138	2162	matK	T	C	missense variant	moderate
139	2163	matK	T	G	synonymous variant	low
140	2163	matK	T	C	synonymous variant	low
141	2168	matK	C	T	missense variant	moderate
142	2190	matK	C	T	synonymous variant	low
143	2199	matK	A	C	synonymous variant	low
144	2201	matK	G	C	missense variant	moderate
145	2205	matK	A	C	synonymous variant	low
146	2205	matK	A	G	synonymous variant	low
147	2213	matK	G	T	synonymous variant	low
148	2248	matK	C	T	missense variant	moderate
149	2253	matK	G	A	synonymous variant	low
150	2259	matK	G	A	synonymous variant	low
151	2262	matK	G	A	synonymous variant	low
152	2271	matK	A	C	synonymous variant	low
153	2276	matK	G	T	missense variant	moderate
154	2277	matK	A	G	synonymous variant	low
155	2282	matK	T	C	missense variant	moderate
156	2283	matK	G	A	synonymous variant	low
157	2284	matK	C	A	missense variant	moderate
158	2285	matK	A	C	missense variant	moderate
159	2290	matK	C	T	missense variant	moderate
160	2294	matK	G	C	missense variant	moderate
161	2312	matK	C	A	missense variant	moderate
162	2314	matK	A	G	missense variant	moderate
163	2319	matK	C	T	synonymous variant	low
164	2322	matK	T	C	synonymous variant	low
165	2328	matK	C	T	synonymous variant	low
166	2334	matK	G	A	synonymous variant	low
167	2335	matK	G	C	missense variant	moderate
168	2349	matK	A	C	synonymous variant	low
169	2355	matK	C	T	synonymous variant	low
170	2355	matK	C	A	synonymous variant	low
171	2359	matK	A	G	missense variant	moderate
172	2360	matK	A	C	missense variant	moderate
173	2363	matK	C	T	missense variant	moderate
174	2376	matK	C	A	synonymous variant	low
175	2376	matK	C	T	synonymous variant	low
176	2388	matK	T	C	synonymous variant	low
177	2392	matK	C	A	missense variant	moderate
178	2394	matK	A	T	synonymous variant	low
179	2399	matK	A	T	missense variant	moderate
180	2400	matK	C	A	synonymous variant	low
181	2400	matK	C	T	synonymous variant	low
182	2402	matK	G	A	missense variant	moderate
183	2414	matK	C	A	missense variant	moderate
184	2415	matK	T	C	synonymous variant	low
185	2417	matK	A	G	synonymous variant	low
186	2423	matK	C	T	missense variant	moderate
187	2424	matK	G	A	synonymous variant	low
188	2427	matK	C	T	synonymous variant	low
189	2430	matK	C	T	synonymous variant	low
190	2444	matK	C	A	missense variant	moderate
191	2446	matK	G	A	missense variant	moderate
192	2450	matK	T	A	missense variant	moderate
193	2452	matK	A	T	missense variant	moderate
194	2454	matK	T	C	synonymous variant	low
195	2456	matK	A	G	missense variant	moderate
196	2456	matK	A	T	missense variant	moderate
197	2465	matK	G	A	synonymous variant	low
198	2468	matK	T	A	missense variant	moderate
199	2474	matK	T	C	missense variant	moderate
200	2475	matK	C	T	synonymous variant	low
201	2484	matK	T	C	synonymous variant	low
202	2489	matK	G	T	missense variant	moderate
203	2490	matK	G	A	synonymous variant	low
204	2491	matK	T	G	missense variant	moderate
205	2493	matK	T	C	synonymous variant	low
206	2495	matK	G	A	missense variant	moderate
207	2496	matK	T	C	synonymous variant	low
208	2499	matK	G	C	missense variant	moderate
209	2499	matK	G	T	synonymous variant	low
210	2502	matK	A	G	synonymous variant	low
211	2510	matK	A	G	missense variant	moderate
212	2514	matK	A	C	synonymous variant	low
213	2516	matK	C	T	missense variant	moderate
214	2525	matK	C	A	missense variant	moderate
215	2528	matK	G	A	missense variant	moderate
216	2529	matK	G	C	synonymous variant	low
217	2546	matK	T	G	missense variant	moderate
218	2547	matK	A	G	synonymous variant	low
219	2552	matK	T	G	missense variant	moderate
220	2555	matK	A	G	missense variant	moderate
221	2556	matK	A	G	synonymous variant	low
222	2559	matK	C	T	synonymous variant	low
223	2559	matK	C	A	missense variant	moderate
224	2560	matK	C	T	missense variant	moderate
225	2564	matK	C	T	missense variant	moderate
226	2565	matK	C	T	synonymous variant	low
227	2577	matK	C	T	synonymous variant	low
228	2577	matK	C	A	synonymous variant	low
229	2584	matK	G	A	missense variant	moderate
230	2589	matK	A	G	synonymous variant	low
231	2590	matK	C	G	missense variant	moderate
232	2590	matK	C	T	missense variant	moderate
233	2592	matK	T	C	synonymous variant	low
234	2598	matK	T	C	synonymous variant	low
235	2598	matK	T	A	missense variant	moderate
236	2603	matK	T	G	missense variant	moderate
237	2617	matK	T	C	missense variant	moderate
238	2631	matK	C	T	synonymous variant	low
239	2633	matK	G	T	missense variant	moderate
240	2633	matK	G	A	synonymous variant	low
241	2633	matK	G	C	missense variant	moderate
242	2636	matK	G	T	missense variant	moderate
243	2640	matK	G	A	synonymous variant	low
244	2646	matK	C	T	synonymous variant	low
245	2649	matK	C	T	synonymous variant	low
246	2652	matK	A	T	synonymous variant	low
247	2653	matK	G	A	missense variant	moderate
248	2654	matK	C	A	missense variant	moderate
249	2657	matK	G	A	synonymous variant	low
250	2661	matK	T	G	synonymous variant	low
251	2661	matK	T	A	synonymous variant	low
252	2661	matK	T	C	synonymous variant	low
253	2662	matK	G	A	missense variant	moderate
254	2675	matK	A	G	missense variant	moderate
255	2676	matK	T	G	missense variant	moderate
256	2685	matK	A	C	missense variant	moderate
257	2688	matK	C	T	missense variant	moderate
258	2694	matK	A	G	synonymous variant	low
259	2717	matK	T	C	missense variant	moderate
260	2719	matK	G	T	missense variant	moderate
261	2720	matK	A	C	missense variant	moderate
262	2720	matK	A	T	missense variant	moderate
263	2721	matK	G	A	synonymous variant	low
264	2722	matK	G	T	missense variant	moderate
265	2722	matK	G	A	missense variant	moderate
266	2726	matK	G	T	missense variant	moderate
267	2733	matK	A	G	synonymous variant	low
268	2737	matK	G	A	missense variant	moderate
269	2738	matK	C	T	missense variant	moderate
270	2739	matK	A	G	synonymous variant	low
271	2751	matK	T	C	synonymous variant	low
272	2751	matK	T	G	synonymous variant	low
273	2754	matK	A	C	synonymous variant	low
274	2754	matK	A	G	synonymous variant	low
275	2759	matK	G	A	missense variant	moderate
276	2759	matK	G	T	missense variant	moderate
277	2759	matK	G	C	missense variant	moderate
278	2760	matK	T	A	missense variant	moderate
279	2760	matK	T	C	synonymous variant	low
280	2763	matK	T	A	synonymous variant	low
281	2764	matK	A	T	missense variant	moderate
282	2766	matK	T	C	synonymous variant	low
283	2775	matK	G	A	synonymous variant	low
284	2779	matK	T	C	missense variant	moderate
285	2781	matK	T	A	synonymous variant	low
286	2785	matK	C	T	missense variant	moderate
287	2795	matK	A	G	missense variant	moderate
288	2796	matK	G	A	synonymous variant	low
289	2799	matK	C	A	synonymous variant	low
290	2799	matK	C	T	synonymous variant	low
291	2803	matK	G	A	missense variant	moderate
292	2803	matK	G	T	missense variant	moderate
293	2809	matK	G	A	missense variant	moderate
294	2815	matK	T	C	missense variant	moderate
295	2824	matK	G	T	missense variant	moderate
296	2825	matK	A	T	missense variant	moderate
297	2831	matK	G	T	missense variant	moderate
298	2832	matK	A	G	synonymous variant	low
299	2836	matK	C	A	missense variant	moderate
300	2838	matK	A	G	synonymous variant	low
301	2847	matK	T	G	missense variant	moderate
302	2850	matK	G	A	synonymous variant	low
303	2852	matK	T	C	missense variant	moderate
304	2854	matK	A	G	missense variant	moderate
305	2859	matK	G	A	synonymous variant	low
306	2866	matK	C	T	missense variant	moderate
307	2873	matK	G	A	missense variant	moderate
308	2877	matK	A	G	synonymous variant	low
309	2880	matK	A	G	synonymous variant	low
310	2889	matK	T	C	synonymous variant	low
311	2900	matK	G	T	synonymous variant	low
312	2902	matK	G	T	missense variant	moderate
313	2902	matK	G	A	missense variant	moderate
314	2903	matK	G	T	missense variant	moderate
315	2909	matK	T	G	missense variant	moderate
316	2913	matK	T	G	synonymous variant	low
317	2915	matK	A	C	missense variant	moderate
318	2921	matK	A	T	missense variant	moderate
319	2922	matK	A	C	missense variant	moderate
320	2922	matK	A	G	synonymous variant	low
321	2923	matK	A	G	missense variant	moderate
322	2924	matK	A	T	missense variant	moderate
323	2925	matK	A	T	missense variant	moderate
324	2926	matK	T	A	missense variant	moderate
325	2928	matK	A	T	missense variant	moderate
326	2928	matK	A	G	synonymous variant	low
327	2929	matK	T	G	missense variant	moderate
328	2930	matK	T	G	missense variant	moderate
329	2931	matK	T	G	synonymous variant	low
330	2933	matK	A	G	missense variant	moderate
331	2934	matK	A	G	synonymous variant	low
332	2941	matK	A	G	missense variant	moderate
333	2944	matK	C	A	missense variant	moderate
334	2944	matK	C	G	missense variant	moderate
335	2950	matK	C	A	missense variant	moderate
336	2953	matK	T	C	missense variant	moderate
337	2956	matK	T	G	missense variant	moderate
338	2964	matK	G	A	synonymous variant	low
339	2976	matK	T	C	synonymous variant	low
340	2988	matK	C	T	synonymous variant	low
341	2999	matK	C	G	missense variant	moderate
342	3000	matK	G	A	synonymous variant	low
343	3008	matK	C	T	missense variant	moderate
344	3009	matK	C	A	missense variant	moderate
345	3009	matK	C	G	missense variant	moderate
346	3010	matK	C	T	stop gained	high
347	3012	matK	A	G	synonymous variant	low
348	3015	matK	G	A	synonymous variant	low
349	3018	matK	A	G	synonymous variant	low
350	3021	matK	G	T	synonymous variant	low
351	3022	matK	G	T	missense variant	moderate
352	3033	matK	G	A	synonymous variant	low
353	3039	matK	C	T	synonymous variant	low
354	3041	matK	G	A	synonymous variant	low
355	3045	matK	A	G	synonymous variant	low
356	3046	matK	A	G	missense variant	moderate
357	3048	matK	G	A	synonymous variant	low
358	3048	matK	G	C	synonymous variant	low
359	3068	matK	T	C	missense variant	moderate
360	3073	matK	A	G	missense variant	moderate
361	3075	matK	G	A	synonymous variant	low
362	3084	matK	A	T	missense variant	moderate
363	3090	matK	G	A	synonymous variant	low
364	3092	matK	A	T	missense variant	moderate
365	3096	matK	G	A	synonymous variant	low
366	3102	matK	T	G	missense variant	moderate
367	3108	matK	A	G	synonymous variant	low
368	3115	matK	A	G	missense variant	moderate
369	3116	matK	T	G	missense variant	moderate
370	3125	matK	T	G	missense variant	moderate
371	3149	matK	C	T	missense variant	moderate
372	3150	matK	G	A	synonymous variant	low
373	3151	matK	G	A	missense variant	moderate
374	3151	matK	G	C	missense variant	moderate
375	3160	matK	G	T	missense variant	moderate
376	3162	matK	C	T	synonymous variant	low
377	3169	matK	G	C	missense variant	moderate
378	3171	matK	A	G	synonymous variant	low
379	3174	matK	T	G	synonymous variant	low
380	3178	matK	A	G	missense variant	moderate
381	3194	matK	A	G	missense variant	moderate
382	3202	matK	A	G	missense variant	moderate
383	3210	matK	G	T	synonymous variant	low
384	3210	matK	G	C	synonymous variant	low
385	3212	matK	T	C	missense variant	moderate
386	3213	matK	G	A	synonymous variant	low
387	3225	matK	T	C	missense variant	moderate
388	3228	matK	T	C	synonymous variant	low
389	3229	matK	T	A	missense variant	moderate
390	3229	matK	T	G	missense variant	moderate
391	3230	matK	T	G	missense variant	moderate
392	3234	matK	A	C	synonymous variant	low
393	3242	matK	G	A	synonymous variant	low
394	3258	matK	C	A	missense variant	moderate
395	3261	matK	T	A	missense variant	moderate
396	3262	matK	T	A	missense variant	moderate
397	3262	matK	T	G	missense variant	moderate
398	3263	matK	T	G	missense variant	moderate
399	3264	matK	T	A	missense variant	moderate
400	3268	matK	T	G	missense variant	moderate
401	3269	matK	G	T	missense variant	moderate
402	3270	matK	G	T	synonymous variant	low
403	3271	matK	G	T	missense variant	moderate
404	3272	matK	G	T	missense variant	moderate
405	3273	matK	G	A	synonymous variant	low
406	3276	matK	A	C	synonymous variant	low
407	3277	matK	G	T	missense variant	moderate
408	3280	matK	T	G	missense variant	moderate
409	3286	matK	G	A	missense variant	moderate
410	3287	matK	C	A	missense variant	moderate
411	3288	matK	G	A	synonymous variant	low
412	3293	matK	T	A	missense variant	moderate
413	3294	matK	A	T	synonymous variant	low
414	3295	matK	A	G	missense variant	moderate
415	3296	matK	T	A	missense variant	moderate
416	3296	matK	T	G	missense variant	moderate
417	3297	matK	A	C	missense variant	moderate
418	3306	matK	C	A	missense variant	moderate
419	3311	matK	T	G	missense variant	moderate
420	3321	matK	A	C	missense variant	moderate
421	3338	matK	T	G	missense variant	moderate
422	3351	matK	A	G	synonymous variant	low
423	3352	matK	G	T	missense variant	moderate
424	3357	matK	A	C	missense variant	moderate
425	3358	matK	T	G	missense variant	moderate
426	3360	matK	A	T	missense variant	moderate
427	3360	matK	A	G	synonymous variant	low
428	3378	matK	C	A	missense variant	moderate
429	3381	matK	C	T	synonymous variant	low
430	3386	matK	T	C	missense variant	moderate
431	3387	matK	C	A	synonymous variant	low
432	3387	matK	C	T	synonymous variant	low
433	3387	matK	C	G	synonymous variant	low
434	3388	matK	G	A	missense variant	moderate
435	3392	matK	C	T	missense variant	moderate
436	3392	matK	C	G	missense variant	moderate
437	3403	matK	T	C	missense variant	moderate
438	3417	matK	T	G	synonymous variant	low
439	3419	matK	C	T	missense variant	moderate
440	3449	matK	A	G	missense variant	moderate
441	3453	matK	G	T	missense variant	moderate
442	3456	matK	G	A	synonymous variant	low
443	3458	matK	C	T	missense variant	moderate
444	3459	matK	A	G	synonymous variant	low
445	3461	matK	G	A	missense variant	moderate
446	3462	matK	T	C	synonymous variant	low
447	3466	matK	T	G	missense variant	moderate
448	3469	matK	T	G	missense variant	moderate
449	3473	matK	T	C	missense variant	moderate
450	3476	matK	C	A	missense variant	moderate
451	3477	matK	T	C	synonymous variant	low
452	3478	matK	A	C	missense variant	moderate
453	3479	matK	G	A	synonymous variant	low
454	3483	matK	T	G	missense variant	moderate
455	3490	matK	C	A	missense variant	moderate
456	3491	matK	C	T	missense variant	moderate
457	3492	matK	T	G	missense variant	moderate
458	3494	matK	G	T	missense variant	moderate
459	3498	matK	T	G	missense variant	moderate
460	5212	rps16	G	T	missense variant	moderate
461	5214	rps16	A	G	missense variant	moderate
462	5217	rps16	T	A	stop gained	high
463	5219	rps16	G	A	missense variant	moderate
464	5223	rps16	G	A	stop gained	high
465	5231	rps16	A	G	missense variant	moderate
466	5232	rps16	G	A	missense variant	moderate
467	5233	rps16	G	C	synonymous variant	low
468	5234	rps16	C	T	missense variant	moderate
469	5235	rps16	G	T	missense variant	moderate
470	5239	rps16	C	T	synonymous variant	low
471	5251	rps16	C	T	synonymous variant	low
472	5258	rps16	T	C	missense variant	moderate
473	5264	rps16	G	A	missense variant	moderate
474	5278	rps16	A	T	synonymous variant	low
475	5281	rps16	T	C	synonymous variant	low
476	5296	rps16	A	G	synonymous variant	low
477	5296	rps16	A	C	synonymous variant	low
478	5311	rps16	A	G	synonymous variant	low
479	5316	rps16	G	T	missense variant	moderate
480	5320	rps16	A	C	synonymous variant	low
481	5323	rps16	A	C	synonymous variant	low
482	5338	rps16	G	A	synonymous variant	low
483	5347	rps16	C	G	missense variant	moderate
484	5356	rps16	A	G	synonymous variant	low
485	5374	rps16	A	C	synonymous variant	low
486	5374	rps16	A	T	synonymous variant	low
487	5395	rps16	T	G	synonymous variant	low
488	5398	rps16	G	A	synonymous variant	low
489	5400	rps16	A	C	missense variant	moderate
490	5404	rps16	G	A	synonymous variant	low
491	5419	rps16	G	T	synonymous variant	low
492	5435	rps16	C	T	missense variant & splice region variant	moderate
493	6297	rps16	A	G	splice donor variant & intron variant	high
494	6309	rps16	A	G	synonymous variant	low
495	7483	psbK	A	T	synonymous variant	low
496	7486	psbK	T	A	missense variant	moderate
497	7490	psbK	T	G	missense variant	moderate
498	7492	psbK	G	T	missense variant	moderate
499	7505	psbK	T	C	missense variant	moderate
500	7507	psbK	C	T	synonymous variant	low
501	7519	psbK	A	C	synonymous variant	low
502	7520	psbK	A	G	missense variant	moderate
503	7523	psbK	A	C	missense variant	moderate
504	7524	psbK	G	A	missense variant	moderate
505	7546	psbK	C	T	synonymous variant	low
506	7549	psbK	G	A	synonymous variant	low
507	7552	psbK	C	T	synonymous variant	low
508	7552	psbK	C	A	synonymous variant	low
509	7564	psbK	A	G	synonymous variant	low
510	7573	psbK	C	T	synonymous variant	low
511	7573	psbK	C	A	synonymous variant	low
512	7574	psbK	G	A	missense variant	moderate
513	7576	psbK	A	C	synonymous variant	low
514	7591	psbK	A	G	synonymous variant	low
515	7594	psbK	A	C	synonymous variant	low
516	7603	psbK	T	C	synonymous variant	low
517	7612	psbK	G	C	synonymous variant	low
518	7612	psbK	G	A	synonymous variant	low
519	7630	psbK	A	G	synonymous variant	low
520	7645	psbK	T	C	synonymous variant	low
521	7650	psbK	G	A	splice region variant & stop retained variant	low
522	7898	psbI	A	C	synonymous variant	low
523	7917	psbI	G	A	missense variant	moderate
524	7922	psbI	G	A	synonymous variant	low
525	7940	psbI	C	T	synonymous variant	low
526	7946	psbI	C	T	synonymous variant	low
527	7958	psbI	G	A	synonymous variant	low
528	7976	psbI	T	G	synonymous variant	low
529	7982	psbI	T	C	synonymous variant	low
530	7994	psbI	A	C	missense variant	moderate
531	9995	atpA	A	C	stop lost & splice region variant	high
532	9999	atpA	T	C	synonymous variant	low
533	10002	atpA	T	C	synonymous variant	low
534	10024	atpA	A	G	missense variant	moderate
535	10025	atpA	T	C	missense variant	moderate
536	10026	atpA	C	T	synonymous variant	low
537	10029	atpA	T	G	missense variant	moderate
538	10029	atpA	T	C	synonymous variant	low
539	10029	atpA	T	A	missense variant	moderate
540	10031	atpA	C	T	missense variant	moderate
541	10041	atpA	T	C	synonymous variant	low
542	10054	atpA	G	A	missense variant	moderate
543	10055	atpA	C	T	missense variant	moderate
544	10059	atpA	C	T	synonymous variant	low
545	10065	atpA	G	C	missense variant	moderate
546	10069	atpA	G	T	missense variant	moderate
547	10070	atpA	T	A	missense variant	moderate
548	10086	atpA	T	A	synonymous variant	low
549	10092	atpA	G	T	synonymous variant	low
550	10098	atpA	T	G	missense variant	moderate
551	10101	atpA	G	A	synonymous variant	low
552	10104	atpA	C	T	synonymous variant	low
553	10106	atpA	G	T	missense variant	moderate
554	10107	atpA	A	G	synonymous variant	low
555	10107	atpA	A	C	synonymous variant	low
556	10114	atpA	T	G	missense variant	moderate
557	10119	atpA	A	T	synonymous variant	low
558	10120	atpA	G	T	missense variant	moderate
559	10125	atpA	G	A	synonymous variant	low
560	10159	atpA	T	C	missense variant	moderate
561	10164	atpA	G	A	synonymous variant	low
562	10189	atpA	T	C	missense variant	moderate
563	10209	atpA	C	A	synonymous variant	low
564	10211	atpA	G	A	synonymous variant	low
565	10214	atpA	T	C	missense variant	moderate
566	10224	atpA	C	G	synonymous variant	low
567	10224	atpA	C	T	synonymous variant	low
568	10227	atpA	C	T	synonymous variant	low
569	10228	atpA	G	C	missense variant	moderate
570	10229	atpA	A	C	missense variant	moderate
571	10229	atpA	A	G	missense variant	moderate
572	10233	atpA	G	C	synonymous variant	low
573	10233	atpA	G	A	synonymous variant	low
574	10236	atpA	A	G	synonymous variant	low
575	10238	atpA	A	C	missense variant	moderate
576	10239	atpA	T	G	synonymous variant	low
577	10254	atpA	G	A	synonymous variant	low
578	10272	atpA	T	C	synonymous variant	low
579	10293	atpA	C	T	synonymous variant	low
580	10296	atpA	A	G	synonymous variant	low
581	10308	atpA	G	A	synonymous variant	low
582	10320	atpA	G	A	synonymous variant	low
583	10353	atpA	T	C	synonymous variant	low
584	10353	atpA	T	G	synonymous variant	low
585	10365	atpA	T	C	synonymous variant	low
586	10369	atpA	G	A	missense variant	moderate
587	10374	atpA	G	A	synonymous variant	low
588	10374	atpA	G	T	synonymous variant	low
589	10377	atpA	A	G	synonymous variant	low
590	10383	atpA	T	C	synonymous variant	low
591	10385	atpA	G	T	missense variant	moderate
592	10392	atpA	G	A	synonymous variant	low
593	10410	atpA	G	C	synonymous variant	low
594	10416	atpA	T	C	synonymous variant	low
595	10419	atpA	C	T	synonymous variant	low
596	10428	atpA	A	C	synonymous variant	low
597	10434	atpA	A	C	synonymous variant	low
598	10446	atpA	G	A	synonymous variant	low
599	10449	atpA	C	T	synonymous variant	low
600	10455	atpA	G	A	synonymous variant	low
601	10463	atpA	C	A	missense variant	moderate
602	10467	atpA	A	G	synonymous variant	low
603	10476	atpA	G	A	synonymous variant	low
604	10478	atpA	C	A	missense variant	moderate
605	10497	atpA	G	A	synonymous variant	low
606	10509	atpA	A	G	synonymous variant	low
607	10533	atpA	C	T	synonymous variant	low
608	10542	atpA	T	C	synonymous variant	low
609	10545	atpA	C	T	synonymous variant	low
610	10548	atpA	T	C	synonymous variant	low
611	10587	atpA	A	C	synonymous variant	low
612	10590	atpA	T	G	missense variant	moderate
613	10594	atpA	C	A	missense variant	moderate
614	10601	atpA	T	C	missense variant	moderate
615	10603	atpA	G	A	missense variant	moderate
616	10608	atpA	A	C	synonymous variant	low
617	10611	atpA	G	A	synonymous variant	low
618	10626	atpA	G	A	synonymous variant	low
619	10637	atpA	A	G	synonymous variant	low
620	10650	atpA	T	C	synonymous variant	low
621	10653	atpA	C	T	synonymous variant	low
622	10659	atpA	A	C	synonymous variant	low
623	10659	atpA	A	T	synonymous variant	low
624	10671	atpA	C	T	synonymous variant	low
625	10674	atpA	C	T	synonymous variant	low
626	10701	atpA	G	T	synonymous variant	low
627	10707	atpA	A	C	synonymous variant	low
628	10722	atpA	G	C	synonymous variant	low
629	10726	atpA	G	A	missense variant	moderate
630	10728	atpA	A	G	synonymous variant	low
631	10731	atpA	A	G	synonymous variant	low
632	10744	atpA	G	A	missense variant	moderate
633	10755	atpA	T	C	synonymous variant	low
634	10758	atpA	A	G	synonymous variant	low
635	10761	atpA	G	A	synonymous variant	low
636	10767	atpA	A	G	synonymous variant	low
637	10771	atpA	T	A	missense variant	moderate
638	10781	atpA	G	A	synonymous variant	low
639	10782	atpA	A	G	synonymous variant	low
640	10785	atpA	T	C	synonymous variant	low
641	10806	atpA	G	A	synonymous variant	low
642	10809	atpA	T	C	synonymous variant	low
643	10815	atpA	T	G	synonymous variant	low
644	10821	atpA	A	G	synonymous variant	low
645	10821	atpA	A	C	synonymous variant	low
646	10824	atpA	G	A	synonymous variant	low
647	10827	atpA	G	A	synonymous variant	low
648	10833	atpA	C	A	synonymous variant	low
649	10835	atpA	T	C	missense variant	moderate
650	10836	atpA	T	C	synonymous variant	low
651	10839	atpA	A	G	synonymous variant	low
652	10866	atpA	T	C	synonymous variant	low
653	10884	atpA	A	G	synonymous variant	low
654	10887	atpA	C	T	synonymous variant	low
655	10887	atpA	C	A	synonymous variant	low
656	10893	atpA	C	T	synonymous variant	low
657	10899	atpA	C	T	synonymous variant	low
658	10905	atpA	A	C	synonymous variant	low
659	10908	atpA	T	C	synonymous variant	low
660	10920	atpA	G	A	synonymous variant	low
661	10923	atpA	A	C	synonymous variant	low
662	10926	atpA	T	C	synonymous variant	low
663	10935	atpA	G	A	synonymous variant	low
664	10940	atpA	C	T	missense variant	moderate
665	10950	atpA	C	T	synonymous variant	low
666	10959	atpA	A	G	synonymous variant	low
667	10968	atpA	A	C	synonymous variant	low
668	10974	atpA	T	C	synonymous variant	low
669	10977	atpA	G	A	synonymous variant	low
670	10995	atpA	G	A	synonymous variant	low
671	11001	atpA	T	C	synonymous variant	low
672	11016	atpA	T	C	synonymous variant	low
673	11022	atpA	T	C	synonymous variant	low
674	11028	atpA	A	G	synonymous variant	low
675	11031	atpA	A	G	synonymous variant	low
676	11043	atpA	G	A	synonymous variant	low
677	11049	atpA	A	C	synonymous variant	low
678	11049	atpA	A	T	synonymous variant	low
679	11067	atpA	C	T	synonymous variant	low
680	11070	atpA	T	G	synonymous variant	low
681	11079	atpA	A	G	synonymous variant	low
682	11085	atpA	G	A	synonymous variant	low
683	11100	atpA	C	A	synonymous variant	low
684	11118	atpA	G	A	synonymous variant	low
685	11121	atpA	A	G	synonymous variant	low
686	11124	atpA	T	C	synonymous variant	low
687	11133	atpA	T	C	synonymous variant	low
688	11136	atpA	A	G	synonymous variant	low
689	11145	atpA	A	G	synonymous variant	low
690	11147	atpA	A	C	missense variant	moderate
691	11150	atpA	A	G	missense variant	moderate
692	11154	atpA	T	C	synonymous variant	low
693	11157	atpA	G	A	synonymous variant	low
694	11157	atpA	G	T	synonymous variant	low
695	11163	atpA	A	G	synonymous variant	low
696	11166	atpA	A	G	synonymous variant	low
697	11169	atpA	A	G	synonymous variant	low
698	11192	atpA	T	C	missense variant	moderate
699	11199	atpA	A	C	synonymous variant	low
700	11208	atpA	A	G	synonymous variant	low
701	11208	atpA	A	C	synonymous variant	low
702	11214	atpA	G	A	synonymous variant	low
703	11220	atpA	G	T	synonymous variant	low
704	11220	atpA	G	A	synonymous variant	low
705	11223	atpA	T	G	synonymous variant	low
706	11235	atpA	T	C	synonymous variant	low
707	11241	atpA	T	C	synonymous variant	low
708	11273	atpA	T	G	missense variant	moderate
709	11280	atpA	G	A	synonymous variant	low
710	11283	atpA	A	T	synonymous variant	low
711	11289	atpA	T	C	synonymous variant	low
712	11301	atpA	A	G	synonymous variant	low
713	11307	atpA	A	G	synonymous variant	low
714	11322	atpA	C	A	synonymous variant	low
715	11331	atpA	G	T	synonymous variant	low
716	11337	atpA	C	G	synonymous variant	low
717	11343	atpA	C	T	synonymous variant	low
718	11364	atpA	A	G	synonymous variant	low
719	11367	atpA	T	G	synonymous variant	low
720	11367	atpA	T	C	synonymous variant	low
721	11403	atpA	G	A	synonymous variant	low
722	11406	atpA	A	G	synonymous variant	low
723	11409	atpA	G	T	synonymous variant	low
724	11412	atpA	T	C	synonymous variant	low
725	11421	atpA	T	C	synonymous variant	low
726	11427	atpA	A	C	synonymous variant	low
727	11430	atpA	G	T	synonymous variant	low
728	11430	atpA	G	C	synonymous variant	low
729	11441	atpA	C	T	missense variant	moderate
730	11442	atpA	C	T	synonymous variant	low
731	11443	atpA	T	G	missense variant	moderate
732	11448	atpA	T	C	synonymous variant	low
733	11453	atpA	T	G	synonymous variant	low
734	11454	atpA	A	G	synonymous variant	low
735	11472	atpA	T	C	synonymous variant	low
736	11475	atpA	G	A	synonymous variant	low
737	11489	atpA	T	C	missense variant	moderate
738	11507	atpA	T	G	missense variant	moderate
739	11576	atpF	C	T	synonymous variant	low
740	11591	atpF	C	T	synonymous variant	low
741	11600	atpF	C	T	missense variant	moderate
742	11603	atpF	A	G	synonymous variant	low
743	11618	atpF	T	G	synonymous variant	low
744	11636	atpF	C	T	synonymous variant	low
745	11657	atpF	C	G	synonymous variant	low
746	11668	atpF	G	A	synonymous variant	low
747	11672	atpF	T	C	synonymous variant	low
748	11675	atpF	T	C	synonymous variant	low
749	11681	atpF	G	A	synonymous variant	low
750	11687	atpF	C	T	synonymous variant	low
751	11704	atpF	T	G	synonymous variant	low
752	11714	atpF	A	T	synonymous variant	low
753	11717	atpF	C	T	synonymous variant	low
754	11720	atpF	T	C	synonymous variant	low
755	11747	atpF	A	G	synonymous variant	low
756	11765	atpF	T	C	synonymous variant	low
757	11777	atpF	C	A	missense variant	moderate
758	11781	atpF	T	G	missense variant	moderate
759	11783	atpF	G	A	synonymous variant	low
760	11786	atpF	G	A	synonymous variant	low
761	11786	atpF	G	T	synonymous variant	low
762	11788	atpF	A	C	missense variant	moderate
763	11801	atpF	C	A	missense variant	moderate
764	11801	atpF	C	T	synonymous variant	low
765	11810	atpF	T	C	synonymous variant	low
766	11813	atpF	T	C	synonymous variant	low
767	11825	atpF	G	A	synonymous variant	low
768	11832	atpF	T	G	missense variant	moderate
769	11835	atpF	A	G	missense variant	moderate
770	11836	atpF	C	T	missense variant	moderate
771	11839	atpF	G	T	synonymous variant	low
772	11843	atpF	C	T	synonymous variant	low
773	11844	atpF	T	A	missense variant	moderate
774	11848	atpF	C	T	missense variant	moderate
775	11855	atpF	C	T	synonymous variant	low
776	11856	atpF	G	A	missense variant	moderate
777	11867	atpF	C	A	synonymous variant	low
778	11873	atpF	G	A	synonymous variant	low
779	11888	atpF	T	C	synonymous variant	low
780	11890	atpF	C	T	missense variant	moderate
781	11891	atpF	C	T	synonymous variant	low
782	11893	atpF	G	A	synonymous variant	low
783	11894	atpF	T	C	synonymous variant	low
784	11899	atpF	C	T	missense variant	moderate
785	11907	atpF	C	G	missense variant	moderate
786	11911	atpF	C	T	missense variant	moderate
787	11915	atpF	T	C	synonymous variant	low
788	11917	atpF	G	A	synonymous variant	low
789	11918	atpF	T	C	synonymous variant	low
790	11924	atpF	T	G	synonymous variant	low
791	11931	atpF	C	T	missense variant	moderate
792	11944	atpF	A	G	synonymous variant	low
793	11951	atpF	C	T	synonymous variant	low
794	12731	atpF	T	C	synonymous variant	low
795	12735	atpF	T	C	missense variant	moderate
796	12748	atpF	C	T	missense variant	moderate
797	12752	atpF	C	A	synonymous variant	low
798	12761	atpF	C	T	synonymous variant	low
799	12773	atpF	A	G	synonymous variant	low
800	12780	atpF	G	A	missense variant	moderate
801	12785	atpF	T	G	synonymous variant	low
802	12791	atpF	T	A	missense variant	moderate
803	12800	atpF	G	A	synonymous variant	low
804	12818	atpF	C	T	synonymous variant	low
805	12821	atpF	G	C	synonymous variant	low
806	12843	atpF	G	A	missense variant	moderate
807	12848	atpF	G	T	missense variant	moderate
808	12851	atpF	A	C	synonymous variant	low
809	13318	atpH	G	A	synonymous variant	low
810	13321	atpH	G	A	synonymous variant	low
811	13330	atpH	T	C	synonymous variant	low
812	13336	atpH	G	A	synonymous variant	low
813	13345	atpH	T	G	synonymous variant	low
814	13351	atpH	C	T	synonymous variant	low
815	13353	atpH	G	A	synonymous variant	low
816	13354	atpH	T	C	synonymous variant	low
817	13354	atpH	T	A	synonymous variant	low
818	13378	atpH	A	G	synonymous variant	low
819	13381	atpH	A	C	synonymous variant	low
820	13384	atpH	C	T	synonymous variant	low
821	13393	atpH	C	T	synonymous variant	low
822	13405	atpH	T	C	synonymous variant	low
823	13407	atpH	G	T	synonymous variant	low
824	13408	atpH	T	G	synonymous variant	low
825	13417	atpH	C	T	synonymous variant	low
826	13420	atpH	C	T	synonymous variant	low
827	13432	atpH	C	T	synonymous variant	low
828	13438	atpH	G	A	synonymous variant	low
829	13438	atpH	G	T	synonymous variant	low
830	13456	atpH	C	T	synonymous variant	low
831	13468	atpH	G	A	synonymous variant	low
832	13480	atpH	C	T	synonymous variant	low
833	13483	atpH	A	G	synonymous variant	low
834	13492	atpH	A	C	synonymous variant	low
835	13507	atpH	G	A	synonymous variant	low
836	13513	atpH	C	T	synonymous variant	low
837	13542	atpH	T	C	missense variant	moderate
838	14752	atpI	T	C	synonymous variant	low
839	14755	atpI	G	A	synonymous variant	low
840	14764	atpI	G	A	synonymous variant	low
841	14773	atpI	T	C	synonymous variant	low
842	14775	atpI	A	G	synonymous variant	low
843	14776	atpI	G	A	synonymous variant	low
844	14827	atpI	G	A	synonymous variant	low
845	14846	atpI	G	A	missense variant	moderate
846	14872	atpI	A	C	synonymous variant	low
847	14872	atpI	A	T	synonymous variant	low
848	14875	atpI	T	C	synonymous variant	low
849	14878	atpI	T	C	synonymous variant	low
850	14887	atpI	A	G	synonymous variant	low
851	14911	atpI	G	A	synonymous variant	low
852	14925	atpI	G	A	synonymous variant	low
853	14926	atpI	G	C	synonymous variant	low
854	14935	atpI	G	A	synonymous variant	low
855	14947	atpI	A	G	synonymous variant	low
856	14953	atpI	A	T	synonymous variant	low
857	14956	atpI	G	A	synonymous variant	low
858	14971	atpI	A	G	synonymous variant	low
859	14971	atpI	A	C	synonymous variant	low
860	14983	atpI	G	A	synonymous variant	low
861	15000	atpI	C	T	missense variant	moderate
862	15001	atpI	C	T	synonymous variant	low
863	15004	atpI	T	C	synonymous variant	low
864	15015	atpI	T	A	missense variant	moderate
865	15028	atpI	G	A	synonymous variant	low
866	15034	atpI	T	G	synonymous variant	low
867	15043	atpI	A	C	synonymous variant	low
868	15046	atpI	G	A	synonymous variant	low
869	15051	atpI	A	G	synonymous variant	low
870	15064	atpI	G	C	synonymous variant	low
871	15067	atpI	A	C	synonymous variant	low
872	15070	atpI	A	G	synonymous variant	low
873	15091	atpI	G	A	synonymous variant	low
874	15100	atpI	C	T	synonymous variant	low
875	15103	atpI	A	G	synonymous variant	low
876	15115	atpI	T	G	synonymous variant	low
877	15118	atpI	G	A	synonymous variant	low
878	15120	atpI	T	G	missense variant	moderate
879	15127	atpI	A	G	synonymous variant	low
880	15139	atpI	C	G	synonymous variant	low
881	15142	atpI	T	C	synonymous variant	low
882	15151	atpI	C	T	synonymous variant	low
883	15151	atpI	C	A	synonymous variant	low
884	15154	atpI	C	A	synonymous variant	low
885	15187	atpI	G	T	synonymous variant	low
886	15187	atpI	G	A	synonymous variant	low
887	15196	atpI	T	C	synonymous variant	low
888	15205	atpI	T	C	synonymous variant	low
889	15217	atpI	C	T	synonymous variant	low
890	15235	atpI	C	T	synonymous variant	low
891	15274	atpI	G	A	synonymous variant	low
892	15292	atpI	T	C	synonymous variant	low
893	15304	atpI	A	G	synonymous variant	low
894	15307	atpI	T	G	synonymous variant	low
895	15309	atpI	T	G	missense variant	moderate
896	15312	atpI	T	C	missense variant	moderate
897	15319	atpI	A	C	synonymous variant	low
898	15333	atpI	C	A	missense variant	moderate
899	15364	atpI	A	G	synonymous variant	low
900	15364	atpI	A	C	synonymous variant	low
901	15379	atpI	A	G	synonymous variant	low
902	15385	atpI	T	G	synonymous variant	low
903	15412	atpI	T	C	synonymous variant	low
904	15433	atpI	C	T	synonymous variant	low
905	15436	atpI	C	A	synonymous variant	low
906	15441	atpI	C	T	missense variant	moderate
907	15454	atpI	A	C	synonymous variant	low
908	15465	atpI	G	T	missense variant	moderate
909	15465	atpI	G	A	synonymous variant	low
910	15698	rps2	A	C	synonymous variant	low
911	15722	rps2	A	C	synonymous variant	low
912	15760	rps2	A	G	synonymous variant	low
913	15763	rps2	G	T	synonymous variant	low
914	15764	rps2	G	T	synonymous variant	low
915	15776	rps2	A	C	synonymous variant	low
916	15785	rps2	A	G	synonymous variant	low
917	15788	rps2	C	T	synonymous variant	low
918	15788	rps2	C	G	synonymous variant	low
919	15797	rps2	A	C	synonymous variant	low
920	15806	rps2	T	C	synonymous variant	low
921	15814	rps2	C	T	missense variant	moderate
922	15818	rps2	G	A	synonymous variant	low
923	15886	rps2	A	T	missense variant	moderate
924	15905	rps2	G	A	synonymous variant	low
925	15923	rps2	T	C	synonymous variant	low
926	15941	rps2	A	T	synonymous variant	low
927	15950	rps2	C	G	synonymous variant	low
928	15950	rps2	C	A	synonymous variant	low
929	15992	rps2	C	T	synonymous variant	low
930	15998	rps2	C	T	synonymous variant	low
931	16000	rps2	T	G	synonymous variant	low
932	16011	rps2	C	T	missense variant	moderate
933	16013	rps2	G	A	synonymous variant	low
934	16016	rps2	G	A	synonymous variant	low
935	16016	rps2	G	C	missense variant	moderate
936	16018	rps2	T	G	missense variant	moderate
937	16021	rps2	T	C	missense variant	moderate
938	16022	rps2	C	A	synonymous variant	low
939	16037	rps2	C	T	synonymous variant	low
940	16046	rps2	G	A	synonymous variant	low
941	16067	rps2	C	T	synonymous variant	low
942	16088	rps2	C	T	synonymous variant	low
943	16100	rps2	A	G	synonymous variant	low
944	16133	rps2	A	G	synonymous variant	low
945	16136	rps2	C	T	synonymous variant	low
946	16137	rps2	T	C	missense variant	moderate
947	16148	rps2	C	T	synonymous variant	low
948	16151	rps2	T	C	synonymous variant	low
949	16166	rps2	T	C	synonymous variant	low
950	16178	rps2	G	T	synonymous variant	low
951	16184	rps2	A	G	synonymous variant	low
952	16208	rps2	A	G	synonymous variant	low
953	16210	rps2	T	C	missense variant	moderate
954	16250	rps2	C	A	synonymous variant	low
955	16256	rps2	A	G	synonymous variant	low
956	16260	rps2	C	A	missense variant	moderate
957	16283	rps2	A	G	synonymous variant	low
958	16286	rps2	T	C	synonymous variant	low
959	16289	rps2	A	T	synonymous variant	low
960	16301	rps2	G	T	synonymous variant	low
961	16316	rps2	T	C	synonymous variant	low
962	16331	rps2	T	C	synonymous variant	low
963	16333	rps2	T	G	synonymous variant	low
964	16358	rps2	T	C	synonymous variant	low
965	16370	rps2	C	T	synonymous variant	low
966	16665	rpoC2	T	G	stop lost & splice region variant	high
967	16670	rpoC2	G	A	synonymous variant	low
968	16671	rpoC2	C	T	missense variant	moderate
969	16677	rpoC2	T	C	missense variant	moderate
970	16678	rpoC2	A	C	missense variant	moderate
971	16678	rpoC2	A	T	missense variant	moderate
972	16682	rpoC2	T	G	missense variant	moderate
973	16682	rpoC2	T	A	missense variant	moderate
974	16685	rpoC2	T	C	synonymous variant	low
975	16687	rpoC2	C	T	missense variant	moderate
976	16699	rpoC2	A	C	missense variant	moderate
977	16712	rpoC2	A	C	missense variant	moderate
978	16723	rpoC2	C	G	missense variant	moderate
979	16731	rpoC2	T	C	missense variant	moderate
980	16734	rpoC2	T	C	missense variant	moderate
981	16736	rpoC2	C	A	missense variant	moderate
982	16740	rpoC2	T	G	missense variant	moderate
983	16741	rpoC2	T	G	missense variant	moderate
984	16753	rpoC2	G	A	missense variant	moderate
985	16754	rpoC2	A	G	synonymous variant	low
986	16755	rpoC2	A	G	missense variant	moderate
987	16769	rpoC2	C	T	synonymous variant	low
988	16769	rpoC2	C	A	missense variant	moderate
989	16779	rpoC2	T	G	missense variant	moderate
990	16779	rpoC2	T	C	missense variant	moderate
991	16782	rpoC2	A	C	missense variant	moderate
992	16784	rpoC2	T	A	missense variant	moderate
993	16784	rpoC2	T	G	missense variant	moderate
994	16793	rpoC2	G	C	missense variant	moderate
995	16799	rpoC2	G	A	synonymous variant	low
996	16805	rpoC2	A	G	synonymous variant	low
997	16808	rpoC2	G	A	synonymous variant	low
998	16817	rpoC2	A	C	synonymous variant	low
999	16817	rpoC2	A	T	synonymous variant	low
1000	16820	rpoC2	C	T	synonymous variant	low
1001	16826	rpoC2	A	G	synonymous variant	low
1002	16843	rpoC2	A	G	synonymous variant	low
1003	16859	rpoC2	G	T	synonymous variant	low
1004	16871	rpoC2	G	T	synonymous variant	low
1005	16874	rpoC2	G	A	synonymous variant	low
1006	16877	rpoC2	G	A	synonymous variant	low
1007	16898	rpoC2	A	G	synonymous variant	low
1008	16913	rpoC2	C	T	synonymous variant	low
1009	16969	rpoC2	T	C	missense variant	moderate
1010	16970	rpoC2	G	C	synonymous variant	low
1011	16971	rpoC2	G	A	missense variant	moderate
1012	16985	rpoC2	C	A	synonymous variant	low
1013	16985	rpoC2	C	T	synonymous variant	low
1014	16987	rpoC2	A	C	missense variant	moderate
1015	16994	rpoC2	C	T	synonymous variant	low
1016	17000	rpoC2	G	A	synonymous variant	low
1017	17006	rpoC2	C	T	synonymous variant	low
1018	17015	rpoC2	A	C	synonymous variant	low
1019	17018	rpoC2	T	C	synonymous variant	low
1020	17021	rpoC2	C	T	synonymous variant	low
1021	17021	rpoC2	C	G	synonymous variant	low
1022	17023	rpoC2	G	A	synonymous variant	low
1023	17027	rpoC2	T	C	synonymous variant	low
1024	17032	rpoC2	T	C	missense variant	moderate
1025	17033	rpoC2	T	G	synonymous variant	low
1026	17033	rpoC2	T	C	synonymous variant	low
1027	17039	rpoC2	T	G	synonymous variant	low
1028	17066	rpoC2	A	G	synonymous variant	low
1029	17081	rpoC2	C	G	synonymous variant	low
1030	17108	rpoC2	A	G	synonymous variant	low
1031	17114	rpoC2	T	G	synonymous variant	low
1032	17120	rpoC2	T	C	synonymous variant	low
1033	17135	rpoC2	C	T	synonymous variant	low
1034	17147	rpoC2	T	C	synonymous variant	low
1035	17156	rpoC2	C	T	synonymous variant	low
1036	17186	rpoC2	A	G	synonymous variant	low
1037	17192	rpoC2	T	C	synonymous variant	low
1038	17193	rpoC2	A	G	missense variant	moderate
1039	17201	rpoC2	T	G	synonymous variant	low
1040	17210	rpoC2	A	G	synonymous variant	low
1041	17216	rpoC2	C	A	missense variant	moderate
1042	17218	rpoC2	A	T	missense variant	moderate
1043	17219	rpoC2	A	G	synonymous variant	low
1044	17222	rpoC2	T	C	synonymous variant	low
1045	17223	rpoC2	C	A	missense variant	moderate
1046	17244	rpoC2	C	T	missense variant	moderate
1047	17258	rpoC2	G	A	synonymous variant	low
1048	17266	rpoC2	C	T	missense variant	moderate
1049	17267	rpoC2	C	G	missense variant	moderate
1050	17276	rpoC2	C	T	synonymous variant	low
1051	17294	rpoC2	T	G	synonymous variant	low
1052	17300	rpoC2	A	G	synonymous variant	low
1053	17305	rpoC2	T	C	missense variant	moderate
1054	17306	rpoC2	C	G	synonymous variant	low
1055	17312	rpoC2	C	T	synonymous variant	low
1056	17315	rpoC2	C	T	synonymous variant	low
1057	17321	rpoC2	G	A	synonymous variant	low
1058	17324	rpoC2	T	C	synonymous variant	low
1059	17330	rpoC2	C	A	synonymous variant	low
1060	17330	rpoC2	C	T	synonymous variant	low
1061	17342	rpoC2	A	G	synonymous variant	low
1062	17345	rpoC2	C	T	synonymous variant	low
1063	17351	rpoC2	T	G	synonymous variant	low
1064	17365	rpoC2	T	G	synonymous variant	low
1065	17390	rpoC2	T	G	missense variant	moderate
1066	17405	rpoC2	G	A	synonymous variant	low
1067	17406	rpoC2	G	T	missense variant	moderate
1068	17411	rpoC2	G	T	synonymous variant	low
1069	17423	rpoC2	A	G	synonymous variant	low
1070	17429	rpoC2	A	G	synonymous variant	low
1071	17435	rpoC2	A	T	synonymous variant	low
1072	17444	rpoC2	T	C	synonymous variant	low
1073	17447	rpoC2	A	G	synonymous variant	low
1074	17450	rpoC2	G	A	synonymous variant	low
1075	17459	rpoC2	G	A	synonymous variant	low
1076	17459	rpoC2	G	T	synonymous variant	low
1077	17469	rpoC2	G	A	missense variant	moderate
1078	17471	rpoC2	T	C	synonymous variant	low
1079	17482	rpoC2	C	A	missense variant	moderate
1080	17483	rpoC2	A	G	synonymous variant	low
1081	17489	rpoC2	A	C	missense variant	moderate
1082	17491	rpoC2	T	G	missense variant	moderate
1083	17492	rpoC2	T	G	missense variant	moderate
1084	17494	rpoC2	G	T	missense variant	moderate
1085	17498	rpoC2	A	G	synonymous variant	low
1086	17500	rpoC2	T	C	missense variant	moderate
1087	17510	rpoC2	A	C	synonymous variant	low
1088	17523	rpoC2	T	G	missense variant	moderate
1089	17525	rpoC2	T	C	synonymous variant	low
1090	17536	rpoC2	T	G	missense variant	moderate
1091	17537	rpoC2	G	A	synonymous variant	low
1092	17548	rpoC2	G	T	missense variant	moderate
1093	17567	rpoC2	C	T	synonymous variant	low
1094	17573	rpoC2	G	T	missense variant	moderate
1095	17573	rpoC2	G	A	synonymous variant	low
1096	17576	rpoC2	A	T	synonymous variant	low
1097	17584	rpoC2	T	A	missense variant	moderate
1098	17586	rpoC2	G	A	missense variant	moderate
1099	17586	rpoC2	G	T	missense variant	moderate
1100	17590	rpoC2	T	G	missense variant	moderate
1101	17594	rpoC2	C	A	missense variant	moderate
1102	17595	rpoC2	T	A	missense variant	moderate
1103	17597	rpoC2	A	C	missense variant	moderate
1104	17617	rpoC2	C	T	missense variant	moderate
1105	17621	rpoC2	G	A	synonymous variant	low
1106	17623	rpoC2	G	C	missense variant	moderate
1107	17626	rpoC2	G	T	missense variant	moderate
1108	17632	rpoC2	G	T	missense variant	moderate
1109	17642	rpoC2	A	G	synonymous variant	low
1110	17645	rpoC2	G	A	synonymous variant	low
1111	17647	rpoC2	A	G	missense variant	moderate
1112	17650	rpoC2	G	A	missense variant	moderate
1113	17650	rpoC2	G	T	missense variant	moderate
1114	17653	rpoC2	T	G	missense variant	moderate
1115	17654	rpoC2	C	A	missense variant	moderate
1116	17660	rpoC2	T	C	missense variant	moderate
1117	17660	rpoC2	T	G	synonymous variant	low
1118	17666	rpoC2	C	A	synonymous variant	low
1119	17668	rpoC2	T	G	missense variant	moderate
1120	17671	rpoC2	C	T	missense variant	moderate
1121	17678	rpoC2	A	C	stop gained	high
1122	17679	rpoC2	T	G	missense variant	moderate
1123	17687	rpoC2	T	C	synonymous variant	low
1124	17687	rpoC2	T	A	synonymous variant	low
1125	17688	rpoC2	C	T	missense variant	moderate
1126	17689	rpoC2	C	T	missense variant	moderate
1127	17690	rpoC2	G	T	missense variant	moderate
1128	17702	rpoC2	T	A	missense variant	moderate
1129	17706	rpoC2	T	G	missense variant	moderate
1130	17711	rpoC2	T	C	synonymous variant	low
1131	17713	rpoC2	T	G	missense variant	moderate
1132	17714	rpoC2	T	A	missense variant	moderate
1133	17722	rpoC2	G	C	missense variant	moderate
1134	17724	rpoC2	A	G	missense variant	moderate
1135	17726	rpoC2	A	G	synonymous variant	low
1136	17730	rpoC2	T	A	missense variant	moderate
1137	17730	rpoC2	T	C	missense variant	moderate
1138	17742	rpoC2	T	G	missense variant	moderate
1139	17743	rpoC2	T	C	missense variant	moderate
1140	17764	rpoC2	A	T	missense variant	moderate
1141	17764	rpoC2	A	C	missense variant	moderate
1142	17765	rpoC2	C	T	synonymous variant	low
1143	17765	rpoC2	C	A	synonymous variant	low
1144	17771	rpoC2	C	A	missense variant	moderate
1145	17772	rpoC2	T	A	missense variant	moderate
1146	17779	rpoC2	G	A	missense variant	moderate
1147	17780	rpoC2	A	G	synonymous variant	low
1148	17785	rpoC2	T	G	missense variant	moderate
1149	17786	rpoC2	T	C	synonymous variant	low
1150	17798	rpoC2	T	C	synonymous variant	low
1151	17800	rpoC2	A	G	missense variant	moderate
1152	17808	rpoC2	T	A	missense variant	moderate
1153	17809	rpoC2	T	G	missense variant	moderate
1154	17814	rpoC2	A	C	missense variant	moderate
1155	17827	rpoC2	T	C	missense variant	moderate
1156	17831	rpoC2	T	G	missense variant	moderate
1157	17834	rpoC2	A	G	synonymous variant	low
1158	17844	rpoC2	G	A	missense variant	moderate
1159	17849	rpoC2	C	T	synonymous variant	low
1160	17850	rpoC2	C	G	missense variant	moderate
1161	17853	rpoC2	A	G	missense variant	moderate
1162	17856	rpoC2	G	T	missense variant	moderate
1163	17857	rpoC2	T	G	missense variant	moderate
1164	17859	rpoC2	A	G	missense variant	moderate
1165	17860	rpoC2	T	A	missense variant	moderate
1166	17864	rpoC2	G	A	synonymous variant	low
1167	17865	rpoC2	G	A	missense variant	moderate
1168	17866	rpoC2	G	A	missense variant	moderate
1169	17867	rpoC2	A	G	synonymous variant	low
1170	17870	rpoC2	T	C	synonymous variant	low
1171	17883	rpoC2	A	C	missense variant	moderate
1172	17885	rpoC2	T	C	synonymous variant	low
1173	17887	rpoC2	A	G	missense variant	moderate
1174	17888	rpoC2	T	G	missense variant	moderate
1175	17895	rpoC2	C	A	missense variant	moderate
1176	17897	rpoC2	C	A	synonymous variant	low
1177	17897	rpoC2	C	T	synonymous variant	low
1178	17898	rpoC2	C	T	missense variant	moderate
1179	17900	rpoC2	G	A	synonymous variant	low
1180	17901	rpoC2	T	C	missense variant	moderate
1181	17902	rpoC2	T	C	missense variant	moderate
1182	17914	rpoC2	C	G	missense variant	moderate
1183	17921	rpoC2	G	T	missense variant	moderate
1184	17943	rpoC2	T	C	missense variant	moderate
1185	17945	rpoC2	G	A	synonymous variant	low
1186	17959	rpoC2	T	A	missense variant	moderate
1187	17975	rpoC2	T	G	missense variant	moderate
1188	17978	rpoC2	T	C	synonymous variant	low
1189	17982	rpoC2	C	T	missense variant	moderate
1190	17986	rpoC2	T	G	synonymous variant	low
1191	17993	rpoC2	T	C	synonymous variant	low
1192	17996	rpoC2	C	T	synonymous variant	low
1193	18001	rpoC2	G	T	missense variant	moderate
1194	18005	rpoC2	A	G	synonymous variant	low
1195	18020	rpoC2	G	T	missense variant	moderate
1196	18021	rpoC2	C	T	missense variant	moderate
1197	18025	rpoC2	G	A	missense variant	moderate
1198	18026	rpoC2	T	C	synonymous variant	low
1199	18028	rpoC2	A	G	missense variant	moderate
1200	18038	rpoC2	C	T	synonymous variant	low
1201	18038	rpoC2	C	A	missense variant	moderate
1202	18040	rpoC2	T	G	synonymous variant	low
1203	18042	rpoC2	T	G	missense variant	moderate
1204	18042	rpoC2	T	C	missense variant	moderate
1205	18043	rpoC2	C	G	missense variant	moderate
1206	18057	rpoC2	G	A	missense variant	moderate
1207	18060	rpoC2	T	A	missense variant	moderate
1208	18060	rpoC2	T	G	missense variant	moderate
1209	18061	rpoC2	A	C	missense variant	moderate
1210	18071	rpoC2	G	T	synonymous variant	low
1211	18075	rpoC2	C	T	missense variant	moderate
1212	18078	rpoC2	T	C	missense variant	moderate
1213	18079	rpoC2	C	T	missense variant	moderate
1214	18080	rpoC2	C	T	synonymous variant	low
1215	18083	rpoC2	C	A	missense variant	moderate
1216	18084	rpoC2	C	T	missense variant	moderate
1217	18093	rpoC2	G	A	missense variant	moderate
1218	18096	rpoC2	A	G	missense variant	moderate
1219	18098	rpoC2	C	T	synonymous variant	low
1220	18098	rpoC2	C	A	missense variant	moderate
1221	18100	rpoC2	A	C	missense variant	moderate
1222	18103	rpoC2	C	T	missense variant	moderate
1223	18104	rpoC2	C	T	synonymous variant	low
1224	18113	rpoC2	C	T	synonymous variant	low
1225	18115	rpoC2	G	A	missense variant	moderate
1226	18117	rpoC2	T	C	missense variant	moderate
1227	18119	rpoC2	A	G	synonymous variant	low
1228	18131	rpoC2	G	A	synonymous variant	low
1229	18131	rpoC2	G	T	synonymous variant	low
1230	18139	rpoC2	A	G	missense variant	moderate
1231	18167	rpoC2	T	G	synonymous variant	low
1232	18170	rpoC2	G	A	synonymous variant	low
1233	18175	rpoC2	A	C	missense variant	moderate
1234	18188	rpoC2	A	C	missense variant	moderate
1235	18188	rpoC2	A	G	synonymous variant	low
1236	18191	rpoC2	T	C	synonymous variant	low
1237	18205	rpoC2	C	T	missense variant	moderate
1238	18208	rpoC2	A	C	missense variant	moderate
1239	18209	rpoC2	G	A	synonymous variant	low
1240	18214	rpoC2	C	A	missense variant	moderate
1241	18216	rpoC2	T	C	missense variant	moderate
1242	18218	rpoC2	G	A	synonymous variant	low
1243	18220	rpoC2	C	T	missense variant	moderate
1244	18221	rpoC2	C	T	synonymous variant	low
1245	18224	rpoC2	T	G	missense variant	moderate
1246	18224	rpoC2	T	C	synonymous variant	low
1247	18227	rpoC2	A	G	synonymous variant	low
1248	18228	rpoC2	A	C	missense variant	moderate
1249	18231	rpoC2	G	A	missense variant	moderate
1250	18235	rpoC2	A	C	missense variant	moderate
1251	18237	rpoC2	T	C	missense variant	moderate
1252	18245	rpoC2	G	A	synonymous variant	low
1253	18247	rpoC2	C	T	missense variant	moderate
1254	18248	rpoC2	T	G	missense variant	moderate
1255	18250	rpoC2	G	T	missense variant	moderate
1256	18263	rpoC2	C	T	missense variant	moderate
1257	18263	rpoC2	C	G	missense variant	moderate
1258	18265	rpoC2	T	G	missense variant	moderate
1259	18275	rpoC2	C	A	synonymous variant	low
1260	18283	rpoC2	A	G	synonymous variant	low
1261	18292	rpoC2	T	C	missense variant	moderate
1262	18293	rpoC2	T	C	synonymous variant	low
1263	18293	rpoC2	T	A	synonymous variant	low
1264	18296	rpoC2	G	A	synonymous variant	low
1265	18299	rpoC2	A	G	synonymous variant	low
1266	18305	rpoC2	T	C	synonymous variant	low
1267	18310	rpoC2	G	A	missense variant	moderate
1268	18311	rpoC2	A	G	synonymous variant	low
1269	18314	rpoC2	T	C	synonymous variant	low
1270	18315	rpoC2	G	A	missense variant	moderate
1271	18320	rpoC2	A	G	synonymous variant	low
1272	18329	rpoC2	A	G	synonymous variant	low
1273	18332	rpoC2	A	C	missense variant	moderate
1274	18334	rpoC2	A	G	missense variant	moderate
1275	18351	rpoC2	C	A	missense variant	moderate
1276	18352	rpoC2	T	G	synonymous variant	low
1277	18353	rpoC2	A	G	synonymous variant	low
1278	18355	rpoC2	G	A	missense variant	moderate
1279	18356	rpoC2	T	C	synonymous variant	low
1280	18368	rpoC2	C	T	synonymous variant	low
1281	18386	rpoC2	C	T	synonymous variant	low
1282	18387	rpoC2	T	G	missense variant	moderate
1283	18389	rpoC2	G	A	synonymous variant	low
1284	18410	rpoC2	T	A	synonymous variant	low
1285	18412	rpoC2	T	G	missense variant	moderate
1286	18416	rpoC2	G	A	synonymous variant	low
1287	18419	rpoC2	C	T	synonymous variant	low
1288	18420	rpoC2	G	T	missense variant	moderate
1289	18421	rpoC2	T	C	missense variant	moderate
1290	18422	rpoC2	T	A	synonymous variant	low
1291	18468	rpoC2	T	C	missense variant	moderate
1292	18489	rpoC2	A	G	missense variant	moderate
1293	18503	rpoC2	T	G	missense variant	moderate
1294	18507	rpoC2	A	C	missense variant	moderate
1295	18508	rpoC2	A	G	synonymous variant	low
1296	18509	rpoC2	T	C	synonymous variant	low
1297	18511	rpoC2	T	C	missense variant	moderate
1298	18515	rpoC2	T	C	synonymous variant	low
1299	18515	rpoC2	T	G	synonymous variant	low
1300	18516	rpoC2	G	A	missense variant	moderate
1301	18524	rpoC2	G	A	synonymous variant	low
1302	18536	rpoC2	T	G	synonymous variant	low
1303	18537	rpoC2	A	C	missense variant	moderate
1304	18538	rpoC2	C	A	missense variant	moderate
1305	18542	rpoC2	T	C	synonymous variant	low
1306	18545	rpoC2	C	T	synonymous variant	low
1307	18547	rpoC2	G	A	missense variant	moderate
1308	18548	rpoC2	T	C	synonymous variant	low
1309	18559	rpoC2	T	C	missense variant	moderate
1310	18563	rpoC2	G	A	synonymous variant	low
1311	18564	rpoC2	C	T	missense variant	moderate
1312	18566	rpoC2	G	T	missense variant	moderate
1313	18572	rpoC2	A	G	synonymous variant	low
1314	18578	rpoC2	C	A	missense variant	moderate
1315	18590	rpoC2	T	G	synonymous variant	low
1316	18591	rpoC2	C	T	missense variant	moderate
1317	18593	rpoC2	A	G	synonymous variant	low
1318	18599	rpoC2	A	G	synonymous variant	low
1319	18617	rpoC2	G	T	synonymous variant	low
1320	18623	rpoC2	T	A	synonymous variant	low
1321	18632	rpoC2	T	C	synonymous variant	low
1322	18645	rpoC2	C	T	missense variant	moderate
1323	18647	rpoC2	C	T	synonymous variant	low
1324	18650	rpoC2	C	T	missense variant	moderate
1325	18650	rpoC2	C	G	missense variant	moderate
1326	18653	rpoC2	T	G	synonymous variant	low
1327	18656	rpoC2	A	G	synonymous variant	low
1328	18661	rpoC2	A	G	synonymous variant	low
1329	18662	rpoC2	T	G	synonymous variant	low
1330	18665	rpoC2	G	A	synonymous variant	low
1331	18668	rpoC2	T	G	synonymous variant	low
1332	18668	rpoC2	T	C	synonymous variant	low
1333	18671	rpoC2	T	C	synonymous variant	low
1334	18673	rpoC2	G	T	synonymous variant	low
1335	18679	rpoC2	T	G	synonymous variant	low
1336	18700	rpoC2	T	C	missense variant	moderate
1337	18703	rpoC2	C	T	missense variant	moderate
1338	18705	rpoC2	C	A	missense variant	moderate
1339	18725	rpoC2	C	A	synonymous variant	low
1340	18738	rpoC2	G	T	missense variant	moderate
1341	18739	rpoC2	A	C	missense variant	moderate
1342	18740	rpoC2	A	C	synonymous variant	low
1343	18752	rpoC2	T	C	synonymous variant	low
1344	18752	rpoC2	T	G	missense variant	moderate
1345	18761	rpoC2	C	A	synonymous variant	low
1346	18763	rpoC2	C	T	missense variant	moderate
1347	18770	rpoC2	G	A	synonymous variant	low
1348	18776	rpoC2	G	A	synonymous variant	low
1349	18785	rpoC2	T	C	synonymous variant	low
1350	18785	rpoC2	T	A	synonymous variant	low
1351	18786	rpoC2	C	T	missense variant	moderate
1352	18786	rpoC2	C	A	missense variant	moderate
1353	18793	rpoC2	C	A	missense variant	moderate
1354	18797	rpoC2	C	T	missense variant	moderate
1355	18798	rpoC2	A	G	missense variant	moderate
1356	18803	rpoC2	G	A	synonymous variant	low
1357	18811	rpoC2	G	A	missense variant	moderate
1358	18824	rpoC2	A	G	synonymous variant	low
1359	18830	rpoC2	T	C	synonymous variant	low
1360	18833	rpoC2	A	G	synonymous variant	low
1361	18861	rpoC2	G	A	missense variant	moderate
1362	18877	rpoC2	C	T	missense variant	moderate
1363	18878	rpoC2	A	G	synonymous variant	low
1364	18879	rpoC2	G	T	missense variant	moderate
1365	18884	rpoC2	A	G	synonymous variant	low
1366	18899	rpoC2	C	T	synonymous variant	low
1367	18909	rpoC2	C	A	missense variant	moderate
1368	18926	rpoC2	A	G	synonymous variant	low
1369	18953	rpoC2	A	C	synonymous variant	low
1370	18969	rpoC2	A	T	missense variant	moderate
1371	18971	rpoC2	G	A	synonymous variant	low
1372	18971	rpoC2	G	C	synonymous variant	low
1373	18971	rpoC2	G	T	synonymous variant	low
1374	18983	rpoC2	C	T	synonymous variant	low
1375	18990	rpoC2	C	T	missense variant	moderate
1376	18991	rpoC2	T	C	missense variant	moderate
1377	18995	rpoC2	A	T	synonymous variant	low
1378	19000	rpoC2	G	A	missense variant	moderate
1379	19000	rpoC2	G	T	missense variant	moderate
1380	19004	rpoC2	T	C	synonymous variant	low
1381	19005	rpoC2	A	C	missense variant	moderate
1382	19017	rpoC2	C	T	missense variant	moderate
1383	19034	rpoC2	G	A	synonymous variant	low
1384	19037	rpoC2	T	C	synonymous variant	low
1385	19045	rpoC2	T	G	missense variant	moderate
1386	19062	rpoC2	C	T	missense variant	moderate
1387	19070	rpoC2	C	T	synonymous variant	low
1388	19081	rpoC2	A	C	missense variant	moderate
1389	19084	rpoC2	C	A	missense variant	moderate
1390	19092	rpoC2	T	C	missense variant	moderate
1391	19094	rpoC2	A	G	synonymous variant	low
1392	19095	rpoC2	T	C	missense variant	moderate
1393	19098	rpoC2	A	C	missense variant	moderate
1394	19099	rpoC2	G	A	missense variant	moderate
1395	19105	rpoC2	C	T	missense variant	moderate
1396	19105	rpoC2	C	G	missense variant	moderate
1397	19111	rpoC2	A	G	missense variant	moderate
1398	19113	rpoC2	A	G	missense variant	moderate
1399	19113	rpoC2	A	T	missense variant	moderate
1400	19115	rpoC2	G	A	synonymous variant	low
1401	19120	rpoC2	T	G	missense variant	moderate
1402	19125	rpoC2	T	C	missense variant	moderate
1403	19126	rpoC2	G	A	missense variant	moderate
1404	19127	rpoC2	A	C	synonymous variant	low
1405	19129	rpoC2	C	T	missense variant	moderate
1406	19143	rpoC2	C	T	missense variant	moderate
1407	19144	rpoC2	T	G	synonymous variant	low
1408	19148	rpoC2	T	A	missense variant	moderate
1409	19148	rpoC2	T	C	synonymous variant	low
1410	19161	rpoC2	T	C	missense variant	moderate
1411	19162	rpoC2	C	T	missense variant	moderate
1412	19167	rpoC2	C	A	missense variant	moderate
1413	19169	rpoC2	A	T	synonymous variant	low
1414	19170	rpoC2	G	C	missense variant	moderate
1415	19171	rpoC2	T	A	missense variant	moderate
1416	19172	rpoC2	A	G	synonymous variant	low
1417	19173	rpoC2	C	T	missense variant	moderate
1418	19175	rpoC2	T	C	synonymous variant	low
1419	19185	rpoC2	C	T	missense variant	moderate
1420	19188	rpoC2	G	A	missense variant	moderate
1421	19193	rpoC2	A	G	synonymous variant	low
1422	19196	rpoC2	C	A	missense variant	moderate
1423	19196	rpoC2	C	T	synonymous variant	low
1424	19201	rpoC2	T	A	missense variant	moderate
1425	19202	rpoC2	T	G	missense variant	moderate
1426	19207	rpoC2	G	C	missense variant	moderate
1427	19211	rpoC2	C	G	synonymous variant	low
1428	19212	rpoC2	A	G	missense variant	moderate
1429	19219	rpoC2	C	A	missense variant	moderate
1430	19235	rpoC2	G	A	synonymous variant	low
1431	19239	rpoC2	T	G	missense variant	moderate
1432	19243	rpoC2	T	A	missense variant	moderate
1433	19245	rpoC2	T	G	missense variant	moderate
1434	19247	rpoC2	T	C	synonymous variant	low
1435	19249	rpoC2	T	C	missense variant	moderate
1436	19249	rpoC2	T	G	synonymous variant	low
1437	19253	rpoC2	T	C	synonymous variant	low
1438	19257	rpoC2	G	A	missense variant	moderate
1439	19258	rpoC2	C	A	missense variant	moderate
1440	19259	rpoC2	A	C	synonymous variant	low
1441	19275	rpoC2	T	C	missense variant	moderate
1442	19276	rpoC2	T	C	missense variant	moderate
1443	19298	rpoC2	G	A	synonymous variant	low
1444	19299	rpoC2	A	C	missense variant	moderate
1445	19301	rpoC2	T	G	synonymous variant	low
1446	19304	rpoC2	A	G	synonymous variant	low
1447	19305	rpoC2	A	G	missense variant	moderate
1448	19306	rpoC2	A	G	missense variant	moderate
1449	19307	rpoC2	A	G	synonymous variant	low
1450	19311	rpoC2	A	G	missense variant	moderate
1451	19319	rpoC2	G	A	synonymous variant	low
1452	19320	rpoC2	G	A	missense variant	moderate
1453	19320	rpoC2	G	T	missense variant	moderate
1454	19324	rpoC2	C	T	missense variant	moderate
1455	19326	rpoC2	C	G	missense variant	moderate
1456	19331	rpoC2	A	G	synonymous variant	low
1457	19358	rpoC2	T	C	synonymous variant	low
1458	19361	rpoC2	T	C	synonymous variant	low
1459	19364	rpoC2	T	G	synonymous variant	low
1460	19388	rpoC2	T	C	synonymous variant	low
1461	19389	rpoC2	G	C	missense variant	moderate
1462	19397	rpoC2	C	T	synonymous variant	low
1463	19406	rpoC2	G	A	synonymous variant	low
1464	19415	rpoC2	A	G	synonymous variant	low
1465	19415	rpoC2	A	C	synonymous variant	low
1466	19424	rpoC2	G	A	synonymous variant	low
1467	19430	rpoC2	T	C	synonymous variant	low
1468	19433	rpoC2	T	C	synonymous variant	low
1469	19442	rpoC2	G	A	synonymous variant	low
1470	19457	rpoC2	T	C	synonymous variant	low
1471	19461	rpoC2	C	A	missense variant	moderate
1472	19467	rpoC2	C	T	missense variant	moderate
1473	19481	rpoC2	T	A	missense variant	moderate
1474	19481	rpoC2	T	G	missense variant	moderate
1475	19487	rpoC2	G	A	synonymous variant	low
1476	19492	rpoC2	C	T	missense variant	moderate
1477	19494	rpoC2	C	A	missense variant	moderate
1478	19495	rpoC2	C	G	missense variant	moderate
1479	19505	rpoC2	C	T	synonymous variant	low
1480	19508	rpoC2	A	C	synonymous variant	low
1481	19513	rpoC2	T	C	missense variant	moderate
1482	19520	rpoC2	T	C	synonymous variant	low
1483	19529	rpoC2	T	G	synonymous variant	low
1484	19531	rpoC2	C	T	missense variant	moderate
1485	19538	rpoC2	A	G	synonymous variant	low
1486	19541	rpoC2	A	G	synonymous variant	low
1487	19547	rpoC2	A	C	synonymous variant	low
1488	19556	rpoC2	C	A	missense variant	moderate
1489	19565	rpoC2	G	T	synonymous variant	low
1490	19568	rpoC2	T	C	synonymous variant	low
1491	19578	rpoC2	A	G	missense variant	moderate
1492	19580	rpoC2	G	A	synonymous variant	low
1493	19591	rpoC2	T	G	missense variant	moderate
1494	19598	rpoC2	A	C	missense variant	moderate
1495	19601	rpoC2	C	T	synonymous variant	low
1496	19602	rpoC2	T	C	missense variant	moderate
1497	19603	rpoC2	C	T	missense variant	moderate
1498	19614	rpoC2	T	C	missense variant	moderate
1499	19619	rpoC2	G	A	synonymous variant	low
1500	19621	rpoC2	C	T	missense variant	moderate
1501	19622	rpoC2	T	G	synonymous variant	low
1502	19643	rpoC2	A	G	synonymous variant	low
1503	19652	rpoC2	A	G	synonymous variant	low
1504	19667	rpoC2	A	C	missense variant	moderate
1505	19677	rpoC2	T	C	missense variant	moderate
1506	19678	rpoC2	C	A	missense variant	moderate
1507	19682	rpoC2	G	A	synonymous variant	low
1508	19685	rpoC2	G	A	synonymous variant	low
1509	19691	rpoC2	T	G	synonymous variant	low
1510	19706	rpoC2	A	G	synonymous variant	low
1511	19714	rpoC2	T	G	synonymous variant	low
1512	19715	rpoC2	T	C	synonymous variant	low
1513	19728	rpoC2	G	A	missense variant	moderate
1514	19742	rpoC2	T	C	synonymous variant	low
1515	19763	rpoC2	T	C	synonymous variant	low
1516	19774	rpoC2	G	A	synonymous variant	low
1517	19781	rpoC2	G	A	synonymous variant	low
1518	19784	rpoC2	C	T	synonymous variant	low
1519	19787	rpoC2	T	C	synonymous variant	low
1520	19802	rpoC2	A	G	synonymous variant	low
1521	19805	rpoC2	C	T	synonymous variant	low
1522	19814	rpoC2	A	G	synonymous variant	low
1523	19817	rpoC2	C	T	synonymous variant	low
1524	19819	rpoC2	C	T	missense variant	moderate
1525	19826	rpoC2	T	C	synonymous variant	low
1526	19832	rpoC2	T	C	synonymous variant	low
1527	19845	rpoC2	C	T	missense variant	moderate
1528	19850	rpoC2	A	G	synonymous variant	low
1529	19853	rpoC2	G	A	synonymous variant	low
1530	19861	rpoC2	T	G	synonymous variant	low
1531	19880	rpoC2	G	A	synonymous variant	low
1532	19889	rpoC2	T	C	synonymous variant	low
1533	19907	rpoC2	G	T	synonymous variant	low
1534	19910	rpoC2	G	A	synonymous variant	low
1535	19916	rpoC2	T	G	synonymous variant	low
1536	19916	rpoC2	T	A	synonymous variant	low
1537	19921	rpoC2	A	G	missense variant	moderate
1538	19939	rpoC2	G	A	missense variant	moderate
1539	19946	rpoC2	G	A	synonymous variant	low
1540	19950	rpoC2	C	T	missense variant	moderate
1541	19953	rpoC2	T	G	missense variant	moderate
1542	19957	rpoC2	C	T	missense variant	moderate
1543	19967	rpoC2	A	C	synonymous variant	low
1544	19967	rpoC2	A	T	synonymous variant	low
1545	19978	rpoC2	G	T	missense variant	moderate
1546	19984	rpoC2	T	G	synonymous variant	low
1547	19987	rpoC2	C	T	missense variant	moderate
1548	19993	rpoC2	T	C	missense variant	moderate
1549	19994	rpoC2	G	A	synonymous variant	low
1550	19997	rpoC2	T	G	synonymous variant	low
1551	20000	rpoC2	T	G	synonymous variant	low
1552	20000	rpoC2	T	C	synonymous variant	low
1553	20002	rpoC2	G	T	missense variant	moderate
1554	20003	rpoC2	G	T	synonymous variant	low
1555	20017	rpoC2	C	T	missense variant	moderate
1556	20021	rpoC2	T	C	synonymous variant	low
1557	20033	rpoC2	G	T	synonymous variant	low
1558	20033	rpoC2	G	A	synonymous variant	low
1559	20048	rpoC2	T	G	synonymous variant	low
1560	20056	rpoC2	T	C	missense variant	moderate
1561	20057	rpoC2	T	C	synonymous variant	low
1562	20069	rpoC2	C	A	missense variant	moderate
1563	20079	rpoC2	C	T	missense variant	moderate
1564	20089	rpoC2	C	T	missense variant	moderate
1565	20096	rpoC2	G	A	synonymous variant	low
1566	20102	rpoC2	G	T	synonymous variant	low
1567	20103	rpoC2	A	G	missense variant	moderate
1568	20104	rpoC2	T	C	missense variant	moderate
1569	20111	rpoC2	A	G	synonymous variant	low
1570	20123	rpoC2	A	C	synonymous variant	low
1571	20159	rpoC2	G	C	synonymous variant	low
1572	20171	rpoC2	T	C	synonymous variant	low
1573	20180	rpoC2	C	T	synonymous variant	low
1574	20183	rpoC2	T	C	synonymous variant	low
1575	20201	rpoC2	C	G	synonymous variant	low
1576	20207	rpoC2	T	C	synonymous variant	low
1577	20207	rpoC2	T	G	synonymous variant	low
1578	20210	rpoC2	C	T	synonymous variant	low
1579	20213	rpoC2	T	G	synonymous variant	low
1580	20222	rpoC2	A	G	synonymous variant	low
1581	20234	rpoC2	T	G	synonymous variant	low
1582	20243	rpoC2	T	G	synonymous variant	low
1583	20252	rpoC2	C	A	synonymous variant	low
1584	20254	rpoC2	G	A	synonymous variant	low
1585	20255	rpoC2	T	C	synonymous variant	low
1586	20270	rpoC2	G	A	synonymous variant	low
1587	20288	rpoC2	A	G	synonymous variant	low
1588	20309	rpoC2	C	T	synonymous variant	low
1589	20318	rpoC2	T	C	synonymous variant	low
1590	20339	rpoC2	G	A	synonymous variant	low
1591	20348	rpoC2	G	A	synonymous variant	low
1592	20369	rpoC2	C	T	synonymous variant	low
1593	20375	rpoC2	G	A	synonymous variant	low
1594	20375	rpoC2	G	C	synonymous variant	low
1595	20387	rpoC2	G	T	synonymous variant	low
1596	20393	rpoC2	A	G	synonymous variant	low
1597	20399	rpoC2	A	G	synonymous variant	low
1598	20405	rpoC2	G	C	synonymous variant	low
1599	20420	rpoC2	A	C	synonymous variant	low
1600	20453	rpoC2	A	C	synonymous variant	low
1601	20471	rpoC2	A	G	synonymous variant	low
1602	20474	rpoC2	T	G	missense variant	moderate
1603	20475	rpoC2	T	A	missense variant	moderate
1604	20504	rpoC2	C	T	synonymous variant	low
1605	20504	rpoC2	C	A	synonymous variant	low
1606	20530	rpoC2	T	C	missense variant	moderate
1607	20531	rpoC2	A	C	missense variant	moderate
1608	20531	rpoC2	A	T	missense variant	moderate
1609	20546	rpoC2	A	G	synonymous variant	low
1610	20558	rpoC2	T	A	synonymous variant	low
1611	20567	rpoC2	C	T	synonymous variant	low
1612	20609	rpoC2	G	A	synonymous variant	low
1613	20621	rpoC2	G	A	synonymous variant	low
1614	20630	rpoC2	A	G	synonymous variant	low
1615	20633	rpoC2	C	T	synonymous variant	low
1616	20636	rpoC2	C	T	synonymous variant	low
1617	20642	rpoC2	C	T	synonymous variant	low
1618	20654	rpoC2	C	T	synonymous variant	low
1619	20656	rpoC2	G	A	synonymous variant	low
1620	20657	rpoC2	G	T	synonymous variant	low
1621	20699	rpoC2	C	A	missense variant	moderate
1622	20720	rpoC2	A	G	synonymous variant	low
1623	20729	rpoC2	T	G	synonymous variant	low
1624	20747	rpoC2	G	A	synonymous variant	low
1625	20754	rpoC2	T	C	missense variant	moderate
1626	20965	rpoC1	T	C	synonymous variant	low
1627	20968	rpoC1	G	A	synonymous variant	low
1628	20971	rpoC1	G	A	synonymous variant	low
1629	20992	rpoC1	G	A	synonymous variant	low
1630	20995	rpoC1	C	T	synonymous variant	low
1631	21001	rpoC1	A	G	synonymous variant	low
1632	21007	rpoC1	T	G	synonymous variant	low
1633	21009	rpoC1	G	T	synonymous variant	low
1634	21028	rpoC1	A	G	synonymous variant	low
1635	21043	rpoC1	G	A	synonymous variant	low
1636	21054	rpoC1	T	G	missense variant	moderate
1637	21057	rpoC1	T	C	missense variant	moderate
1638	21081	rpoC1	T	G	missense variant	moderate
1639	21084	rpoC1	G	C	missense variant	moderate
1640	21107	rpoC1	T	G	missense variant	moderate
1641	21121	rpoC1	T	C	synonymous variant	low
1642	21124	rpoC1	A	G	synonymous variant	low
1643	21139	rpoC1	A	G	synonymous variant	low
1644	21163	rpoC1	G	A	synonymous variant	low
1645	21174	rpoC1	G	A	synonymous variant	low
1646	21175	rpoC1	T	C	synonymous variant	low
1647	21176	rpoC1	C	T	missense variant	moderate
1648	21181	rpoC1	C	T	synonymous variant	low
1649	21190	rpoC1	C	T	synonymous variant	low
1650	21193	rpoC1	A	G	synonymous variant	low
1651	21196	rpoC1	G	A	synonymous variant	low
1652	21199	rpoC1	A	G	synonymous variant	low
1653	21205	rpoC1	A	C	missense variant	moderate
1654	21207	rpoC1	T	C	missense variant	moderate
1655	21207	rpoC1	T	G	missense variant	moderate
1656	21229	rpoC1	T	G	synonymous variant	low
1657	21241	rpoC1	G	A	synonymous variant	low
1658	21259	rpoC1	A	G	synonymous variant	low
1659	21271	rpoC1	T	G	missense variant	moderate
1660	21280	rpoC1	C	T	synonymous variant	low
1661	21286	rpoC1	G	A	synonymous variant	low
1662	21287	rpoC1	T	C	missense variant	moderate
1663	21294	rpoC1	C	G	missense variant	moderate
1664	21295	rpoC1	G	A	synonymous variant	low
1665	21296	rpoC1	T	G	missense variant	moderate
1666	21296	rpoC1	T	A	missense variant	moderate
1667	21296	rpoC1	T	C	missense variant	moderate
1668	21301	rpoC1	T	C	synonymous variant	low
1669	21302	rpoC1	C	A	missense variant	moderate
1670	21306	rpoC1	T	C	missense variant	moderate
1671	21312	rpoC1	G	T	missense variant	moderate
1672	21313	rpoC1	A	C	stop gained	high
1673	21314	rpoC1	T	G	missense variant	moderate
1674	21320	rpoC1	C	G	missense variant	moderate
1675	21322	rpoC1	G	A	synonymous variant	low
1676	21322	rpoC1	G	T	synonymous variant	low
1677	21327	rpoC1	T	G	missense variant	moderate
1678	21329	rpoC1	C	T	missense variant	moderate
1679	21358	rpoC1	T	C	synonymous variant	low
1680	21361	rpoC1	A	G	synonymous variant	low
1681	21362	rpoC1	C	T	missense variant	moderate
1682	21367	rpoC1	T	C	synonymous variant	low
1683	21370	rpoC1	A	G	synonymous variant	low
1684	21384	rpoC1	A	G	missense variant	moderate
1685	21385	rpoC1	G	A	synonymous variant	low
1686	21391	rpoC1	A	G	synonymous variant	low
1687	21406	rpoC1	A	G	synonymous variant	low
1688	21427	rpoC1	T	C	synonymous variant	low
1689	21430	rpoC1	A	G	synonymous variant	low
1690	21442	rpoC1	T	C	synonymous variant	low
1691	21444	rpoC1	A	G	synonymous variant	low
1692	21445	rpoC1	G	A	synonymous variant	low
1693	21448	rpoC1	G	A	synonymous variant	low
1694	21475	rpoC1	C	G	synonymous variant	low
1695	21481	rpoC1	C	T	synonymous variant	low
1696	21484	rpoC1	T	C	synonymous variant	low
1697	21487	rpoC1	A	G	synonymous variant	low
1698	21496	rpoC1	A	T	synonymous variant	low
1699	21501	rpoC1	A	G	synonymous variant	low
1700	21502	rpoC1	G	A	synonymous variant	low
1701	21526	rpoC1	A	C	synonymous variant	low
1702	21535	rpoC1	G	A	synonymous variant	low
1703	21541	rpoC1	A	G	synonymous variant	low
1704	21544	rpoC1	G	A	synonymous variant	low
1705	21550	rpoC1	C	T	synonymous variant	low
1706	21598	rpoC1	G	A	synonymous variant	low
1707	21601	rpoC1	T	C	synonymous variant	low
1708	21640	rpoC1	C	T	synonymous variant	low
1709	21649	rpoC1	C	T	synonymous variant	low
1710	21652	rpoC1	T	G	synonymous variant	low
1711	21655	rpoC1	G	A	synonymous variant	low
1712	21661	rpoC1	C	A	synonymous variant	low
1713	21676	rpoC1	A	C	missense variant	moderate
1714	21697	rpoC1	C	T	synonymous variant	low
1715	21699	rpoC1	G	T	missense variant	moderate
1716	21717	rpoC1	T	G	missense variant	moderate
1717	21721	rpoC1	C	T	synonymous variant	low
1718	21727	rpoC1	A	C	synonymous variant	low
1719	21730	rpoC1	T	C	synonymous variant	low
1720	21733	rpoC1	T	C	missense variant	moderate
1721	21742	rpoC1	A	G	synonymous variant	low
1722	21748	rpoC1	A	G	synonymous variant	low
1723	21750	rpoC1	G	T	missense variant	moderate
1724	21751	rpoC1	T	C	synonymous variant	low
1725	21754	rpoC1	T	C	synonymous variant	low
1726	21766	rpoC1	G	A	synonymous variant	low
1727	21780	rpoC1	T	G	missense variant	moderate
1728	21805	rpoC1	G	A	synonymous variant	low
1729	21817	rpoC1	G	A	synonymous variant	low
1730	21826	rpoC1	T	C	synonymous variant	low
1731	21838	rpoC1	A	G	synonymous variant	low
1732	21841	rpoC1	A	G	synonymous variant	low
1733	21847	rpoC1	G	A	synonymous variant	low
1734	21853	rpoC1	G	C	synonymous variant	low
1735	21862	rpoC1	A	C	synonymous variant	low
1736	21874	rpoC1	G	A	synonymous variant	low
1737	21883	rpoC1	G	T	synonymous variant	low
1738	21895	rpoC1	C	T	synonymous variant	low
1739	21898	rpoC1	G	A	synonymous variant	low
1740	21901	rpoC1	A	G	synonymous variant	low
1741	21916	rpoC1	G	T	synonymous variant	low
1742	21937	rpoC1	C	G	synonymous variant	low
1743	21961	rpoC1	G	A	synonymous variant	low
1744	21979	rpoC1	G	A	synonymous variant	low
1745	21982	rpoC1	G	A	synonymous variant	low
1746	22000	rpoC1	T	C	synonymous variant	low
1747	22012	rpoC1	T	C	synonymous variant	low
1748	22027	rpoC1	C	T	synonymous variant	low
1749	22039	rpoC1	T	G	synonymous variant	low
1750	22045	rpoC1	T	C	synonymous variant	low
1751	22048	rpoC1	C	T	synonymous variant	low
1752	22081	rpoC1	G	A	synonymous variant	low
1753	22096	rpoC1	C	A	synonymous variant	low
1754	22099	rpoC1	A	G	synonymous variant	low
1755	22132	rpoC1	C	T	synonymous variant	low
1756	22132	rpoC1	C	G	synonymous variant	low
1757	22135	rpoC1	G	A	synonymous variant	low
1758	22153	rpoC1	A	G	synonymous variant	low
1759	22159	rpoC1	C	T	synonymous variant	low
1760	22168	rpoC1	C	T	synonymous variant	low
1761	22168	rpoC1	C	A	synonymous variant	low
1762	22183	rpoC1	A	C	synonymous variant	low
1763	22189	rpoC1	A	C	synonymous variant	low
1764	22192	rpoC1	C	T	synonymous variant	low
1765	22200	rpoC1	G	A	synonymous variant	low
1766	22219	rpoC1	T	C	synonymous variant	low
1767	22255	rpoC1	T	C	synonymous variant	low
1768	22261	rpoC1	A	G	synonymous variant	low
1769	22264	rpoC1	C	T	synonymous variant	low
1770	22279	rpoC1	C	T	synonymous variant	low
1771	22280	rpoC1	T	C	missense variant	moderate
1772	22284	rpoC1	T	G	synonymous variant	low
1773	22293	rpoC1	C	T	missense variant	moderate
1774	22294	rpoC1	T	C	synonymous variant	low
1775	22299	rpoC1	G	T	synonymous variant	low
1776	22315	rpoC1	A	C	synonymous variant	low
1777	22318	rpoC1	C	G	synonymous variant	low
1778	22323	rpoC1	G	A	missense variant	moderate
1779	22327	rpoC1	T	C	synonymous variant	low
1780	22336	rpoC1	T	C	synonymous variant	low
1781	22339	rpoC1	T	C	synonymous variant	low
1782	22342	rpoC1	T	C	synonymous variant	low
1783	22353	rpoC1	C	A	missense variant	moderate
1784	22354	rpoC1	C	A	missense variant	moderate
1785	22356	rpoC1	A	G	synonymous variant	low
1786	22377	rpoC1	G	T	synonymous variant	low
1787	22386	rpoC1	G	A	synonymous variant	low
1788	22393	rpoC1	T	C	synonymous variant	low
1789	22404	rpoC1	G	T	synonymous variant	low
1790	22405	rpoC1	G	T	synonymous variant	low
1791	22414	rpoC1	C	T	synonymous variant	low
1792	22420	rpoC1	A	G	synonymous variant	low
1793	22423	rpoC1	A	C	synonymous variant	low
1794	22434	rpoC1	G	T	synonymous variant	low
1795	22440	rpoC1	G	T	synonymous variant	low
1796	22447	rpoC1	A	C	missense variant	moderate
1797	22456	rpoC1	T	C	synonymous variant	low
1798	22457	rpoC1	T	C	missense variant	moderate
1799	22457	rpoC1	T	G	missense variant	moderate
1800	22459	rpoC1	G	A	synonymous variant	low
1801	22474	rpoC1	T	A	synonymous variant	low
1802	22480	rpoC1	G	A	synonymous variant	low
1803	22492	rpoC1	G	A	synonymous variant	low
1804	22504	rpoC1	A	G	synonymous variant	low
1805	22537	rpoC1	A	G	synonymous variant	low
1806	22548	rpoC1	C	T	missense variant	moderate
1807	22549	rpoC1	T	G	synonymous variant	low
1808	22558	rpoC1	A	T	synonymous variant	low
1809	23336	rpoC1	G	A	synonymous variant	low
1810	23369	rpoC1	T	C	synonymous variant	low
1811	23378	rpoC1	A	G	synonymous variant	low
1812	23417	rpoC1	C	T	synonymous variant	low
1813	23420	rpoC1	A	G	synonymous variant	low
1814	23435	rpoC1	G	T	synonymous variant	low
1815	23447	rpoC1	A	G	synonymous variant	low
1816	23474	rpoC1	G	A	synonymous variant	low
1817	23483	rpoC1	A	G	synonymous variant	low
1818	23486	rpoC1	T	C	synonymous variant	low
1819	23488	rpoC1	C	T	missense variant	moderate
1820	23489	rpoC1	G	A	synonymous variant	low
1821	23492	rpoC1	T	C	synonymous variant	low
1822	23542	rpoC1	G	T	synonymous variant	low
1823	23564	rpoC1	C	A	synonymous variant	low
1824	23567	rpoC1	A	G	synonymous variant	low
1825	23569	rpoC1	T	C	missense variant	moderate
1826	23574	rpoC1	A	G	missense variant	moderate
1827	23579	rpoC1	C	T	synonymous variant	low
1828	23582	rpoC1	A	G	synonymous variant	low
1829	23590	rpoC1	T	G	synonymous variant	low
1830	23600	rpoC1	T	C	synonymous variant	low
1831	23606	rpoC1	A	G	synonymous variant	low
1832	23609	rpoC1	T	C	synonymous variant	low
1833	23615	rpoC1	A	G	synonymous variant	low
1834	23624	rpoC1	G	A	synonymous variant	low
1835	23624	rpoC1	G	T	synonymous variant	low
1836	23660	rpoC1	T	C	synonymous variant	low
1837	23666	rpoC1	T	C	missense variant	moderate
1838	23668	rpoC1	T	C	missense variant	moderate
1839	23670	rpoC1	T	C	missense variant	moderate
1840	23683	rpoC1	G	A	synonymous variant	low
1841	23685	rpoC1	A	G	missense variant	moderate
1842	23690	rpoC1	T	G	missense variant	moderate
1843	23692	rpoC1	G	T	missense variant	moderate
1844	23693	rpoC1	G	T	synonymous variant	low
1845	23701	rpoC1	C	A	missense variant	moderate
1846	23702	rpoC1	A	G	synonymous variant	low
1847	23711	rpoC1	T	G	missense variant	moderate
1848	23714	rpoC1	A	G	synonymous variant	low
1849	23716	rpoC1	G	T	missense variant	moderate
1850	23723	rpoC1	T	C	synonymous variant	low
1851	23732	rpoC1	T	C	synonymous variant	low
1852	23753	rpoC1	C	G	missense variant	moderate
1853	23754	rpoC1	T	C	missense variant	moderate
1854	23759	rpoC1	G	A	synonymous variant	low
1855	23811	rpoB	A	C	missense variant	moderate
1856	23823	rpoB	G	A	synonymous variant	low
1857	23838	rpoB	A	C	synonymous variant	low
1858	23841	rpoB	G	T	missense variant	moderate
1859	23880	rpoB	A	C	synonymous variant	low
1860	23891	rpoB	G	T	synonymous variant	low
1861	23901	rpoB	T	G	synonymous variant	low
1862	23901	rpoB	T	C	synonymous variant	low
1863	23910	rpoB	C	T	synonymous variant	low
1864	23911	rpoB	T	G	missense variant	moderate
1865	23918	rpoB	T	G	missense variant	moderate
1866	23926	rpoB	G	A	missense variant	moderate
1867	23928	rpoB	T	C	synonymous variant	low
1868	23937	rpoB	G	T	synonymous variant	low
1869	23961	rpoB	G	A	synonymous variant	low
1870	23979	rpoB	A	C	synonymous variant	low
1871	23997	rpoB	C	T	synonymous variant	low
1872	24024	rpoB	T	C	synonymous variant	low
1873	24042	rpoB	T	C	synonymous variant	low
1874	24060	rpoB	T	C	synonymous variant	low
1875	24066	rpoB	C	T	synonymous variant	low
1876	24069	rpoB	T	C	synonymous variant	low
1877	24075	rpoB	G	A	synonymous variant	low
1878	24084	rpoB	T	C	synonymous variant	low
1879	24117	rpoB	T	C	synonymous variant	low
1880	24120	rpoB	A	G	synonymous variant	low
1881	24123	rpoB	G	A	synonymous variant	low
1882	24129	rpoB	T	G	synonymous variant	low
1883	24195	rpoB	T	C	synonymous variant	low
1884	24210	rpoB	T	C	synonymous variant	low
1885	24234	rpoB	G	A	synonymous variant	low
1886	24240	rpoB	T	G	synonymous variant	low
1887	24247	rpoB	T	C	missense variant	moderate
1888	24249	rpoB	C	T	synonymous variant	low
1889	24252	rpoB	A	G	synonymous variant	low
1890	24267	rpoB	T	C	synonymous variant	low
1891	24273	rpoB	A	C	synonymous variant	low
1892	24278	rpoB	T	C	missense variant	moderate
1893	24288	rpoB	G	A	synonymous variant	low
1894	24300	rpoB	T	C	synonymous variant	low
1895	24303	rpoB	A	C	synonymous variant	low
1896	24312	rpoB	T	C	synonymous variant	low
1897	24312	rpoB	T	G	synonymous variant	low
1898	24314	rpoB	G	A	synonymous variant	low
1899	24321	rpoB	C	T	synonymous variant	low
1900	24336	rpoB	A	G	synonymous variant	low
1901	24351	rpoB	A	G	synonymous variant	low
1902	24354	rpoB	T	G	synonymous variant	low
1903	24378	rpoB	C	G	synonymous variant	low
1904	24380	rpoB	G	A	synonymous variant	low
1905	24381	rpoB	A	C	synonymous variant	low
1906	24384	rpoB	C	T	synonymous variant	low
1907	24396	rpoB	G	C	synonymous variant	low
1908	24399	rpoB	C	T	synonymous variant	low
1909	24399	rpoB	C	A	synonymous variant	low
1910	24432	rpoB	T	C	synonymous variant	low
1911	24435	rpoB	G	A	synonymous variant	low
1912	24438	rpoB	C	A	synonymous variant	low
1913	24447	rpoB	T	C	synonymous variant	low
1914	24489	rpoB	A	G	synonymous variant	low
1915	24502	rpoB	C	A	missense variant	moderate
1916	24503	rpoB	T	G	synonymous variant	low
1917	24506	rpoB	G	A	missense variant	moderate
1918	24522	rpoB	A	G	synonymous variant	low
1919	24524	rpoB	T	C	missense variant	moderate
1920	24525	rpoB	A	G	synonymous variant	low
1921	24540	rpoB	T	C	synonymous variant	low
1922	24546	rpoB	A	G	synonymous variant	low
1923	24549	rpoB	T	G	synonymous variant	low
1924	24549	rpoB	T	A	synonymous variant	low
1925	24552	rpoB	T	C	synonymous variant	low
1926	24583	rpoB	G	A	missense variant	moderate
1927	24600	rpoB	C	G	synonymous variant	low
1928	24600	rpoB	C	A	synonymous variant	low
1929	24600	rpoB	C	T	synonymous variant	low
1930	24601	rpoB	G	T	missense variant	moderate
1931	24618	rpoB	A	G	synonymous variant	low
1932	24623	rpoB	C	T	missense variant	moderate
1933	24624	rpoB	C	T	synonymous variant	low
1934	24626	rpoB	C	T	missense variant	moderate
1935	24627	rpoB	T	C	synonymous variant	low
1936	24628	rpoB	T	C	missense variant	moderate
1937	24645	rpoB	C	T	synonymous variant	low
1938	24660	rpoB	A	G	synonymous variant	low
1939	24664	rpoB	C	G	missense variant	moderate
1940	24666	rpoB	A	C	synonymous variant	low
1941	24675	rpoB	A	C	synonymous variant	low
1942	24705	rpoB	G	A	synonymous variant	low
1943	24717	rpoB	G	A	synonymous variant	low
1944	24747	rpoB	C	T	synonymous variant	low
1945	24756	rpoB	C	T	synonymous variant	low
1946	24777	rpoB	A	C	synonymous variant	low
1947	24780	rpoB	T	C	synonymous variant	low
1948	24789	rpoB	A	G	synonymous variant	low
1949	24804	rpoB	G	A	synonymous variant	low
1950	24807	rpoB	T	C	synonymous variant	low
1951	24819	rpoB	A	G	synonymous variant	low
1952	24822	rpoB	C	T	synonymous variant	low
1953	24840	rpoB	A	G	synonymous variant	low
1954	24846	rpoB	G	A	synonymous variant	low
1955	24855	rpoB	G	T	synonymous variant	low
1956	24876	rpoB	A	G	synonymous variant	low
1957	24879	rpoB	C	T	synonymous variant	low
1958	24888	rpoB	G	A	synonymous variant	low
1959	24888	rpoB	G	T	missense variant	moderate
1960	24889	rpoB	T	C	missense variant	moderate
1961	24894	rpoB	G	A	synonymous variant	low
1962	24903	rpoB	A	G	synonymous variant	low
1963	24906	rpoB	G	A	synonymous variant	low
1964	24906	rpoB	G	T	synonymous variant	low
1965	24909	rpoB	G	A	synonymous variant	low
1966	24924	rpoB	A	G	synonymous variant	low
1967	24927	rpoB	C	T	synonymous variant	low
1968	24944	rpoB	G	T	synonymous variant	low
1969	24945	rpoB	T	G	synonymous variant	low
1970	24948	rpoB	A	G	synonymous variant	low
1971	24969	rpoB	T	G	synonymous variant	low
1972	24970	rpoB	C	G	missense variant	moderate
1973	24982	rpoB	C	T	missense variant	moderate
1974	24987	rpoB	A	G	synonymous variant	low
1975	24993	rpoB	G	A	synonymous variant	low
1976	25005	rpoB	T	C	synonymous variant	low
1977	25020	rpoB	C	T	synonymous variant	low
1978	25026	rpoB	T	C	synonymous variant	low
1979	25047	rpoB	G	A	synonymous variant	low
1980	25059	rpoB	A	G	synonymous variant	low
1981	25071	rpoB	G	A	synonymous variant	low
1982	25074	rpoB	A	G	synonymous variant	low
1983	25089	rpoB	A	G	synonymous variant	low
1984	25092	rpoB	C	T	synonymous variant	low
1985	25098	rpoB	G	A	synonymous variant	low
1986	25100	rpoB	T	C	missense variant	moderate
1987	25101	rpoB	T	C	synonymous variant	low
1988	25129	rpoB	C	T	missense variant	moderate
1989	25130	rpoB	T	G	synonymous variant	low
1990	25140	rpoB	T	G	missense variant	moderate
1991	25140	rpoB	T	C	synonymous variant	low
1992	25141	rpoB	T	G	missense variant	moderate
1993	25155	rpoB	A	C	synonymous variant	low
1994	25155	rpoB	A	G	synonymous variant	low
1995	25176	rpoB	A	G	synonymous variant	low
1996	25184	rpoB	C	A	missense variant	moderate
1997	25194	rpoB	G	A	synonymous variant	low
1998	25194	rpoB	G	C	missense variant	moderate
[truncated: 7,292 more rows]

## Sheet: Supplementary Table 11
Supplementary Table 11 The effects of 635 InDel mutations on 42 protein-coding genes in Rosaceae plastomes
Code	Sites	Gene	Reference	Alternative	Insertion / Deletion size (bp)	Level	Effects
1	2056	matK	A	AT	1	high	frameshift variant
2	2058	matK	T	TAAAAC	5	high	frameshift variant
3	2062	matK	T	TTAAAAG	6	moderate	conservative inframe insertion
4	2069	matK	T	TAAAAGT	6	moderate	conservative inframe insertion
5	2714	matK	AGAT	A	-3	moderate	conservative inframe deletion
6	2715	matK	GAT	G	-2	high	frameshift variant
7	2720	matK	AG	A	-1	high	frameshift variant
8	2729	matK	AATCAT	A	-5	high	frameshift variant
9	2730	matK	ATCATT	A	-5	high	frameshift variant
10	2735	matK	TAGCAAAGAC	TAAGAC	-4	high	frameshift variant
11	2735	matK	TAGCAAAGAC	T	-9	moderate	conservative inframe deletion
12	2737	matK	GCAAA	G	-4	high	frameshift variant
13	2747	matK	CT	C	-1	high	frameshift variant
14	2750	matK	CTA	C	-2	high	frameshift variant
15	2752	matK	A	ACTTCTA	6	moderate	conservative inframe insertion
16	2924	matK	A	AAAA	3	moderate	conservative inframe insertion
17	2924	matK	A	AAAAAAA	6	moderate	conservative inframe insertion
18	3149	matK	C	CGATTTC	6	moderate	conservative inframe insertion
19	3153	matK	TTCTGTCGCC	T	-9	moderate	disruptive inframe deletion
20	3162	matK	CTCTAAG	C	-6	moderate	disruptive inframe deletion
21	3257	matK	C	CAAA	3	moderate	conservative inframe insertion
22	3258	matK	C	CAAA	3	moderate	disruptive inframe insertion
23	3268	matK	TGGG	T	-3	moderate	disruptive inframe deletion
24	3369	matK	TACATTATCC	T	-9	moderate	disruptive inframe deletion
25	5210	rps16	T	TTTTAT	5	high	frameshift variant
26	5227	rps16	A	ATGTTGA	6	moderate	conservative inframe insertion
27	5229	rps16	T	TAAGGCG	6	moderate	conservative inframe insertion
28	7492	psbK	G	GATCTGT	6	moderate	conservative inframe insertion
29	7497	psbK	G	GTATCTG	6	moderate	conservative inframe insertion
30	7498	psbK	T	TATATAC	6	moderate	conservative inframe insertion
31	7498	psbK	T	TATCTAC	6	moderate	conservative inframe insertion
32	7995	psbI	T	TA	1	high	frameshift variant
33	15694	rps2	A	ATTATTAA	7	high	frameshift variant & splice region variant
34	16403	rps2	C	CA	1	high	frameshift variant
35	16675	rpoC2	AATAAA	A	-5	high	frameshift variant
36	16689	rpoC2	C	CT	1	high	frameshift variant
37	17522	rpoC2	GT	G	-1	high	frameshift variant
38	17525	rpoC2	T	TC	1	high	frameshift variant
39	17607	rpoC2	TGATTATAATCAT	T	-12	moderate	conservative inframe deletion
40	17610	rpoC2	TTATAATCATG	T	-10	high	frameshift variant
41	17622	rpoC2	TGG	T	-2	high	frameshift variant
42	17663	rpoC2	G	GC	1	high	frameshift variant
43	17664	rpoC2	T	TAC	2	high	frameshift variant
44	17665	rpoC2	T	TGCA	3	moderate	conservative inframe insertion
45	17750	rpoC2	C	CAAATAT	6	moderate	disruptive inframe insertion
46	17750	rpoC2	C	CAAATAG	6	moderate	disruptive inframe insertion
47	17862	rpoC2	AG	A	-1	high	frameshift variant
48	17866	rpoC2	GATCTCT	G	-6	moderate	conservative inframe deletion
49	17867	rpoC2	ATCTCT	A	-5	high	frameshift variant
50	17871	rpoC2	CTATCT	C	-5	high	frameshift variant
51	17877	rpoC2	CT	C	-1	high	frameshift variant
52	17887	rpoC2	ATTCTTT	A	-6	moderate	conservative inframe deletion
53	18022	rpoC2	T	TATGGCT	6	moderate	conservative inframe insertion
54	18059	rpoC2	A	AT	1	high	frameshift variant & stop gained
55	18063	rpoC2	A	ATGG	3	moderate	conservative inframe insertion
56	18064	rpoC2	A	AT	1	high	frameshift variant
57	18067	rpoC2	G	GATTGAT	6	moderate	conservative inframe insertion
58	18067	rpoC2	G	GATTTAT	6	moderate	conservative inframe insertion
59	18067	rpoC2	G	GT	1	high	frameshift variant
60	18067	rpoC2	G	GATTAAT	6	moderate	conservative inframe insertion
61	18070	rpoC2	T	TGATATT	6	moderate	conservative inframe insertion
62	18080	rpoC2	C	CGAA	3	moderate	disruptive inframe insertion
63	18244	rpoC2	TGTCTTG	T	-6	moderate	conservative inframe deletion
64	18268	rpoC2	A	AAATTAA	6	moderate	conservative inframe insertion
65	18530	rpoC2	TTTTTTTACC	T	-9	moderate	disruptive inframe deletion
66	18969	rpoC2	A	ATACCATTTA	9	moderate	conservative inframe insertion
67	18969	rpoC2	A	ATTA	3	moderate	conservative inframe insertion
68	19077	rpoC2	AAAAAATCAG	A	-9	moderate	disruptive inframe deletion
69	19078	rpoC2	AAAAATCAGA	A	-9	moderate	conservative inframe deletion
70	19200	rpoC2	C	CCAAAAA	6	moderate	conservative inframe insertion
71	19200	rpoC2	C	CCAAAGA	6	moderate	conservative inframe insertion
72	19221	rpoC2	T	TTTACTG	6	moderate	conservative inframe insertion
73	19229	rpoC2	T	TGTATTTACT	9	moderate	conservative inframe insertion
74	19257	rpoC2	G	GT	1	high	frameshift variant
75	19259	rpoC2	AG	A	-1	high	frameshift variant
76	21261	rpoC1	GTTCTTT	G	-6	moderate	conservative inframe deletion
77	21266	rpoC1	TTTTCTT	T	-6	moderate	conservative inframe deletion
78	25615	rpoB	CTTACCT	C	-6	moderate	disruptive inframe deletion
79	25616	rpoB	TTACCTT	T	-6	moderate	conservative inframe deletion
80	27007	rpoB	ATT	A	-2	high	frameshift variant & start lost
81	42203	psaA	TA	T	-1	high	frameshift variant
82	54414	atpE	C	CGGC	3	moderate	conservative inframe insertion
83	58212	rbcL	TTGAATTCCAAGCAATGGATA	T	-20	high	frameshift variant
84	58219	rbcL	CCAAGCAATGGATACAATTT	C	-19	high	frameshift variant & stop lost & splice region variant
85	58232	rbcL	ACAATTTGAATTCCAAGCAATGGATA	A	-25	high	frameshift variant & stop lost & splice region variant
86	58233	rbcL	CAATTT	C	-5	high	frameshift variant & stop lost & splice region variant
87	58233	rbcL	CAATTT	CTTT	-2	high	frameshift variant
88	58239	rbcL	GAATTCC	G	-6	high	frameshift variant & stop lost & splice region variant
89	58939	accD	AGCCTAG	A	-6	moderate	disruptive inframe deletion
90	58951	accD	T	TTTGAAAATA	9	moderate	disruptive inframe insertion
91	59167	accD	G	GAAAATAAAAATTTTGAGATTG	21	moderate	disruptive inframe insertion
92	59207	accD	TTTATAG	T	-6	moderate	conservative inframe deletion
93	59388	accD	CAATTAC	C	-6	moderate	disruptive inframe deletion
94	59483	accD	GTAATGATTTTAC	G	-12	moderate	disruptive inframe deletion
95	59484	accD	T	TG	1	high	frameshift variant
96	59485	accD	A	ATGGT	4	high	frameshift variant
97	59486	accD	A	AG	1	high	frameshift variant
98	60335	accD	AGATC	A	-4	high	frameshift variant & stop lost & splice region variant
99	62178	ycf4	G	GA	1	high	frameshift variant
100	62978	cemA	TTTACAAAAG	T	-9	moderate	conservative inframe deletion
101	63669	petA	G	GACTTGG	6	moderate	disruptive inframe insertion
102	65832	psbL	TTTT	T	-3	high	frameshift variant & stop lost & splice region variant
103	65832	psbL	TTTT	TTTATTT	3	moderate	conservative inframe insertion & splice region variant
104	65833	psbL	TTT	T	-2	high	frameshift variant & stop lost & splice region variant
105	65834	psbL	TT	T	-1	high	frameshift variant & stop lost & splice region variant
106	65834	psbL	TT	TAT	1	high	frameshift variant & splice region variant
107	65834	psbL	TT	TTTTTAT	5	high	frameshift variant & splice region variant
108	65834	psbL	TT	TTTTTTTTTAT	9	moderate	conservative inframe insertion & splice region variant
109	65834	psbL	TT	TTTTAT	4	high	frameshift variant & splice region variant
110	65835	psbL	T	TTT	2	high	frameshift variant & splice region variant
111	65835	psbL	T	TT	1	high	frameshift variant & splice region variant
112	65835	psbL	T	TTTT	3	moderate	conservative inframe insertion & splice region variant
113	65835	psbL	T	TTTTTTT	6	moderate	conservative inframe insertion & splice region variant
114	70054	rps18	GAA	G	-2	high	frameshift variant
115	70070	rps18	G	GTA	2	high	frameshift variant
116	70071	rps18	G	GA	1	high	frameshift variant
117	70075	rps18	A	AGAG	3	moderate	disruptive inframe insertion
118	70077	rps18	A	AAGA	3	moderate	conservative inframe insertion & splice region variant
119	70079	rps18	T	TAAG	3	moderate	conservative inframe insertion
120	70218	rpl20	T	TTCTCT	5	high	frameshift variant & splice region variant
121	71894	clpP	G	GATAATAT	7	high	splice acceptor variant & intron variant
122	75972	psbT	C	CCAAAAAG	7	high	frameshift variant
123	75978	psbT	A	AGTAAAAT	7	high	frameshift variant & stop gained
124	75978	psbT	A	AGTAAAAG	7	high	frameshift variant & stop gained
125	78048	petB	A	AAGC	3	moderate	disruptive inframe insertion
126	78048	petB	A	AAGG	3	moderate	disruptive inframe insertion
127	79691	rpoA	CTTTCTATTTATA	C	-12	high	frameshift variant & stop lost & splice region variant
128	79695	rpoA	CTATTTATA	C	-8	high	frameshift variant & stop lost & splice region variant
129	79700	rpoA	TATA	T	-3	high	stop lost & disruptive inframe deletion & splice region variant
130	79700	rpoA	TATA	TTA	-1	high	frameshift variant & stop lost & splice region variant
131	80739	rps11	TATTTTT	T	-6	high	frameshift variant & stop lost & splice region variant
132	81531	infA	A	AATCATT	6	low	splice region variant & non coding transcript exon variant
133	82076	rps8	GA	G	-1	high	frameshift variant
134	82084	rps8	T	TC	1	high	frameshift variant
135	82985	rpl16	C	CCTATA	5	high	frameshift variant & stop gained
136	85313	rpl22	A	ATCCCTCAGCTCTAATTTCTAGCTTTA	26	high	frameshift variant & stop gained
137	85321	rpl22	GC	G	-1	high	frameshift variant
138	85323	rpl22	TC	T	-1	high	frameshift variant
139	85323	rpl22	TC	TGC	1	high	frameshift variant
140	85325	rpl22	TAA	T	-2	high	frameshift variant
141	85330	rpl22	TA	T	-1	high	frameshift variant
142	85332	rpl22	TA	T	-1	high	frameshift variant
143	85337	rpl22	T	TTATTCCTCAGCTCTAATTTATAGCTT	26	high	frameshift variant
144	85338	rpl22	T	TA	1	high	frameshift variant
145	85340	rpl22	AGTTT	A	-4	high	frameshift variant
146	85341	rpl22	G	GAATTCC	6	moderate	conservative inframe insertion
147	85345	rpl22	TAG	T	-2	high	frameshift variant
148	85346	rpl22	A	AT	1	high	frameshift variant
149	85352	rpl22	T	TCCTAGC	6	moderate	disruptive inframe insertion
150	85357	rpl22	C	CAT	2	high	frameshift variant
151	85357	rpl22	C	CATCTG	5	high	frameshift variant
152	85727	rpl22	TATCATA	T	-6	high	frameshift variant & start lost
153	85729	rpl22	T	TCTC	3	moderate	conservative inframe insertion
154	85802	rps19	TA	TAATTA	4	high	frameshift variant & splice region variant
155	87585	rpl2	GATTGGA	G	-6	moderate	conservative inframe deletion
156	87591	rpl2	A	ATTTCAC	6	moderate	conservative inframe insertion
157	87592	rpl2	T	TTTCACT	6	moderate	conservative inframe insertion
158	156092	rpl2	A	AAGTGAA	6	moderate	conservative inframe insertion
159	156093	rpl2	ATCCAAT	A	-6	moderate	conservative inframe deletion
160	89445	ycf2	TAGCCAA	T	-6	moderate	conservative inframe deletion
161	89986	ycf2	CTGGATA	C	-6	moderate	disruptive inframe deletion
162	90195	ycf2	T	TGATTCCTAC	9	moderate	disruptive inframe insertion
163	90774	ycf2	CCGTTTT	C	-6	moderate	disruptive inframe deletion
164	90793	ycf2	GTGT	G	-3	moderate	disruptive inframe deletion
165	90830	ycf2	A	ATATTGATTTTGA	12	moderate	conservative inframe insertion
166	90830	ycf2	A	ATATTGATATTGATTTTGA	18	moderate	conservative inframe insertion
167	91166	ycf2	A	ATAAGAT	6	moderate	disruptive inframe insertion
168	91491	ycf2	GTGCGGC	G	-6	moderate	conservative inframe deletion
169	91876	ycf2	C	CGAAAAC	6	moderate	disruptive inframe insertion
170	91952	ycf2	C	CTTCAAC	6	moderate	conservative inframe insertion
171	92105	ycf2	T	TA	1	high	frameshift variant
172	92109	ycf2	GC	G	-1	high	frameshift variant
173	92116	ycf2	T	TG	1	high	frameshift variant
174	92120	ycf2	AT	A	-1	high	frameshift variant
175	92544	ycf2	GGGTTCT	G	-6	moderate	disruptive inframe deletion
176	92647	ycf2	A	ATCATCGATT	9	moderate	disruptive inframe insertion
177	92647	ycf2	A	ATCATTGATT	9	moderate	disruptive inframe insertion
178	92650	ycf2	A	ATCGATTTCA	9	moderate	disruptive inframe insertion
179	92650	ycf2	A	ATCGATTTCG	9	moderate	disruptive inframe insertion
180	92651	ycf2	TA	T	-1	high	frameshift variant
181	92654	ycf2	GTATC	G	-4	high	frameshift variant
182	92660	ycf2	TACCAAA	T	-6	moderate	disruptive inframe deletion
183	92667	ycf2	TCCCA	T	-4	high	frameshift variant
184	92673	ycf2	CA	C	-1	high	frameshift variant
185	92677	ycf2	AGAATCGC	A	-7	high	frameshift variant
186	92861	ycf2	C	CGTTAAC	6	moderate	conservative inframe insertion
187	93335	ycf2	TTGATGATAGTGA	T	-12	moderate	disruptive inframe deletion
188	93347	ycf2	ACGACCGTGA	A	-9	moderate	conservative inframe deletion
189	94263	ycf2	A	AGTAGAA	6	moderate	disruptive inframe insertion
190	94425	ycf2	A	ATACGAA	6	moderate	disruptive inframe insertion
191	94431	ycf2	GTTTGAA	G	-6	moderate	conservative inframe deletion
192	94435	ycf2	G	GAGTTTG	6	moderate	disruptive inframe insertion
193	94449	ycf2	A	AGAAGTA	6	moderate	disruptive inframe insertion
194	94449	ycf2	A	AGAAGGA	6	moderate	disruptive inframe insertion
195	94659	ycf2	TGGAACCATG	T	-9	moderate	conservative inframe deletion
196	94774	ycf2	CCTTTTATCT	C	-9	moderate	conservative inframe deletion
197	94775	ycf2	CTTTTATCTC	C	-9	moderate	conservative inframe deletion
198	148900	ycf2	AGAGATAAAA	A	-9	moderate	conservative inframe deletion
199	149016	ycf2	GCATGGTTCC	G	-9	moderate	conservative inframe deletion
200	149234	ycf2	A	ACTACTT	6	moderate	conservative inframe insertion
201	149234	ycf2	A	ACTCCTT	6	moderate	conservative inframe insertion
202	149247	ycf2	CTTCAAA	C	-6	moderate	conservative inframe deletion
203	149255	ycf2	T	TCAAACT	6	moderate	conservative inframe insertion
204	149258	ycf2	G	GATTCGT	6	moderate	conservative inframe insertion
205	149431	ycf2	T	TACTTCT	6	moderate	conservative inframe insertion
206	150327	ycf2	AGTCACGGTC	A	-9	moderate	conservative inframe deletion
207	150334	ycf2	G	GCCGATA	6	moderate	disruptive inframe insertion
208	150356	ycf2	TCGCTATCATCAATATCGT	T	-18	moderate	conservative inframe deletion
209	150827	ycf2	A	AACGTTA	6	moderate	conservative inframe insertion
210	151000	ycf2	AGCGATTC	A	-7	high	frameshift variant
211	151010	ycf2	TTGATGG	T	-6	moderate	disruptive inframe deletion
212	151018	ycf2	ATTTGGT	A	-6	moderate	disruptive inframe deletion
213	151025	ycf2	ATG	A	-2	high	frameshift variant
214	151029	ycf2	TA	T	-1	high	frameshift variant
215	151031	ycf2	CT	C	-1	high	frameshift variant
216	151036	ycf2	G	GAAATCGATG	9	moderate	conservative inframe insertion
217	151036	ycf2	G	GAAATCAATG	9	moderate	conservative inframe insertion
218	151133	ycf2	GCAGAAC	G	-6	moderate	disruptive inframe deletion
219	151563	ycf2	TA	T	-1	high	frameshift variant
220	151568	ycf2	G	GC	1	high	frameshift variant
221	151574	ycf2	TG	T	-1	high	frameshift variant
222	151579	ycf2	A	AT	1	high	frameshift variant
223	151737	ycf2	A	AAGTTGA	6	moderate	conservative inframe insertion
224	151812	ycf2	T	TTCGTTT	6	moderate	conservative inframe insertion
225	152187	ycf2	CGCCGCA	C	-6	moderate	conservative inframe deletion
226	152512	ycf2	T	TATCTTA	6	moderate	disruptive inframe insertion
227	152857	ycf2	A	AAAATCAATATCA	12	moderate	conservative inframe insertion
228	152857	ycf2	A	AAAATCAATATCAATATCA	18	moderate	conservative inframe insertion
229	152887	ycf2	GAAC	G	-3	moderate	disruptive inframe deletion
230	152903	ycf2	TGAAAAC	T	-6	moderate	disruptive inframe deletion
231	153488	ycf2	C	CCGTAGGAAT	9	moderate	conservative inframe insertion
232	153691	ycf2	CATATCC	C	-6	moderate	conservative inframe deletion
233	154233	ycf2	ATTGGCT	A	-6	moderate	conservative inframe deletion
234	99683	rps7	C	CG	1	high	frameshift variant
235	144000	rps7	A	AC	1	high	frameshift variant
236	111865	ycf1-fragment	ATGTACTTATTAGATCTAA	A	-18	moderate	conservative inframe deletion
237	111883	ycf1-fragment	A	ATGTACTTATTAGATCTAA	18	moderate	conservative inframe insertion
238	112008	ycf1-fragment	ACCTCAGAAA	A	-9	moderate	disruptive inframe deletion
239	112018	ycf1-fragment	C	CCTCAGAAACGGAAGAAAGGGGGGAAAGTGA	30	moderate	disruptive inframe insertion
240	112018	ycf1-fragment	C	CGGGGAAAAGTGA	12	moderate	disruptive inframe insertion
241	112025	ycf1-fragment	A	AAGGGGGGAAAGTGAGGAAGAA	21	moderate	disruptive inframe insertion
242	112025	ycf1-fragment	A	AAGGGGGGGAAGTGAGGAAGAA	21	moderate	disruptive inframe insertion
243	112100	ycf1-fragment	TCCTTCC	T	-6	moderate	disruptive inframe deletion
244	112106	ycf1-fragment	CCCTTCC	C	-6	moderate	disruptive inframe deletion
245	112145	ycf1-fragment	AATCGAT	A	-6	moderate	conservative inframe deletion
246	112203	ycf1-fragment	CACTTTAAAG	C	-9	moderate	disruptive inframe deletion
247	112211	ycf1-fragment	AG	A	-1	high	frameshift variant
248	112213	ycf1-fragment	AG	A	-1	high	frameshift variant
249	112215	ycf1-fragment	AC	A	-1	high	frameshift variant
250	112218	ycf1-fragment	CG	C	-1	high	frameshift variant
251	112219	ycf1-fragment	GCTATA	G	-5	high	frameshift variant
252	112223	ycf1-fragment	TAAAAA	T	-5	high	frameshift variant
253	112228	ycf1-fragment	AT	A	-1	high	frameshift variant
254	112229	ycf1-fragment	TAGACCC	T	-6	moderate	conservative inframe deletion
255	112237	ycf1-fragment	TTTATGA	T	-6	moderate	disruptive inframe deletion
256	112246	ycf1-fragment	CT	C	-1	high	frameshift variant
257	112250	ycf1-fragment	TTA	T	-2	high	frameshift variant
258	112254	ycf1-fragment	CTGGATGGGAA	C	-10	high	frameshift variant
259	112266	ycf1-fragment	CAAGA	C	-4	high	frameshift variant
260	112274	ycf1-fragment	AGAAAAT	A	-6	moderate	conservative inframe deletion
261	112281	ycf1-fragment	TCAA	T	-3	high	stop gained & disruptive inframe deletion
262	112282	ycf1-fragment	CAAAGTT	C	-6	moderate	conservative inframe deletion
263	112285	ycf1-fragment	AG	A	-1	high	frameshift variant
264	112288	ycf1-fragment	TAGAAA	TACAAATATTGAAAGAAA	12	moderate	conservative inframe insertion
265	112288	ycf1-fragment	TAGAAA	T	-5	high	frameshift variant
266	112292	ndhF & ycf1-fragment	AATATTTAAGTTAGA	A	-14	high	bidirectional gene fusion
267	112293	ycf1-fragment	A	AAAAAAGATCTCT	12	moderate	disruptive inframe insertion
268	112294	ycf1-fragment	TA	TCCGA	3	moderate	disruptive inframe insertion
269	112294	ycf1-fragment	TA	T	-1	high	frameshift variant
270	112295	ndhF & ycf1-fragment	ATTTAAGTTAGAAATA	A	-15	high	bidirectional gene fusion
271	112295	ycf1-fragment	ATTTAAGTTAGAAATA	ATTAAGTTAGAAATA	-1	high	frameshift variant
272	112296	ndhF & ycf1-fragment	TTTAAGTTAGAAATATAATAT	TTAT	-17	high	bidirectional gene fusion
273	112296	ndhF & ycf1-fragment	TTTAAGTTAGAAATATAATAT	T	-20	high	bidirectional gene fusion
274	112296	ycf1-fragment	TTTAAGTTAGAAATATAATAT	TTAAGTTAGAAATATAATAT	-1	high	frameshift variant
275	112297	ndhF & ycf1-fragment	TTAAGTTAGAAATATAATATTAA	T	-22	high	bidirectional gene fusion
276	112297	ndhF & ycf1-fragment	TTAAGTTAGAAATATAATATTAA	TA	-21	high	bidirectional gene fusion
277	112298	ycf1-fragment	TAAGTTAGAAATATAATATTAA	TGAAAAAGTTAGAAATATAATATTAA	4	high	frameshift variant
278	112298	ycf1-fragment	TAAGTTAGAAATATAATATTAA	TTTTAAAAAGTTAGAAATATAATATTAA	6	moderate	conservative inframe insertion
279	112298	ycf1-fragment	TAAGTTAGAAATATAATATTAA	TTTAGAAATATAATATTAA	-3	moderate	conservative inframe deletion
280	112298	ndhF & ycf1-fragment	TAAGTTAGAAATATAATATTAA	T	-21	high	bidirectional gene fusion
281	112299	ycf1-fragment	AAGTTAGAAATATAATATTAAA	AAAAAAAGTTAGAAATATAATATTAAA	5	high	frameshift variant
282	112299	ndhF & ycf1-fragment	AAGTTAGAAATATAATATTAAA	AA	-20	high	bidirectional gene fusion
283	112299	ndhF & ycf1-fragment	AAGTTAGAAATATAATATTAAA	A	-21	high	bidirectional gene fusion
284	112299	ndhF & ycf1-fragment	AAGTTAGAAATATAATATTAAA	AAAA	-18	high	bidirectional gene fusion
285	112300	ycf1-fragment	AGTTAGAAAT	ATTAGAAAT	-1	high	frameshift variant
286	112300	ycf1-fragment	AGTTAGAAAT	A	-9	moderate	disruptive inframe deletion
287		ndhF			-9	high	frameshift variant & stop lost & splice region variant
288	112300	ycf1-fragment	AGTTAGAAAT	AAAAT	-5	high	frameshift variant
289		ndhF			-5	high	frameshift variant & stop lost & splice region variant
290	112300	ycf1-fragment	AGTTAGAAAT	AAGAAAAAAAGGTTAGAAAT	10	high	frameshift variant
291	112300	ycf1-fragment	AGTTAGAAAT	ACCGGTTGTGTTGTTAGAAAT	11	high	frameshift variant
292	112301	ycf1-fragment	G	GATCTCTTCCAATTTTTTTTTTATT	24	moderate	conservative inframe insertion
293		ndhF			24	moderate	conservative inframe insertion & splice region variant
294	112302	ycf1-fragment	T	TTTAAGT	6	moderate	disruptive inframe insertion
295		ndhF			6	moderate	conservative inframe insertion & splice region variant
296	112302	ycf1-fragment	T	TTG	2	high	frameshift variant
297		ndhF			2	high	frameshift variant&stop lost & splice region variant
298	112303	ycf1-fragment	TAGAA	T	-4	high	frameshift variant
299		ndhF			-4	high	frameshift variant & stop lost & splice region variant
300	112305	ycf1-fragment	G	GTTTAATATTAATATAAT	17	high	frameshift variant & stop gained
301		ndhF			17	high	frameshift variant & stop gained
302	112305	ycf1-fragment	G	GTA	2	high	frameshift variant
303		ndhF			2	high	frameshift variant
304	112306	ycf1-fragment	A	AT	1	high	frameshift variant
305		ndhF			1	high	frameshift variant
306	112308	ycf1-fragment	ATATAAT	A	-6	high	frameshift variant & stop lost & splice region variant
307		ndhF			-6	moderate	disruptive inframe deletion
308	112308	ycf1-fragment	ATATAAT	AATAAT	-1	high	frameshift variant
309		ndhF			-1	high	frameshift variant
310	112308	ycf1-fragment	ATATAAT	AAAT	-3	high	stop lost & disruptive inframe deletion & splice region variant
311		ndhF			-3	moderate	disruptive inframe deletion
312	112309	ycf1-fragment	TA	TTTTAGTTTAATATTAATATAA	20	high	frameshift variant & stop gained
313		ndhF			20	high	frameshift variant & stop gained
314	112309	ycf1-fragment	TA	T	-1	high	frameshift variant
315		ndhF			-1	high	frameshift variant
316	112310	ndhF	A	ATAATAT	6	moderate	conservative inframe insertion
317	112310	ycf1-fragment	A	AAAATAT	6	moderate	conservative inframe insertion & splice region variant
318		ndhF			6	moderate	conservative inframe insertion
319	112311	ycf1-fragment	TAA	T	-2	high	frameshift variant & stop lost & splice region variant
320		ndhF			-2	high	frameshift variant
321	112312	ndhF	AAT	A	-2	high	frameshift variant
322	112313	ndhF	AT	A	-1	high	frameshift variant
323	112314	ndhF	TATTAAAAAAAAA	T	-12	moderate	disruptive inframe deletion
324	112314	ndhF	TATTAAAAAAAAA	TTTAATTAAAAAAAAA	3	moderate	disruptive inframe insertion
325	112315	ndhF	ATT	A	-2	high	frameshift variant
326	112315	ndhF	ATT	ATTAATATTT	7	high	frameshift variant
327	112315	ndhF	ATT	AATTTAAATTTAATTT	13	high	frameshift variant & stop gained
328	112316	ndhF	TTAAAAAAAAA	T	-10	high	frameshift variant
329	112317	ndhF	TAA	T	-2	high	frameshift variant
330	112319	ndhF	A	AATATTAAA	8	high	frameshift variant
331	112319	ndhF	A	AATATTAA	7	high	frameshift variant
332	112319	ndhF	A	AAAAAAT	6	moderate	conservative inframe insertion
333	112322	ndhF	A	AATAAT	5	high	frameshift variant
334	112325	ndhF	AAA	A	-2	high	frameshift variant
335	112327	ndhF	A	ATC	2	high	frameshift variant & stop gained
336	112328	ndhF	A	ATCAC	4	high	frameshift variant
337	112328	ndhF	A	AC	1	high	frameshift variant
338	112329	ndhF	TAAA	T	-3	moderate	disruptive inframe deletion
339	112433	ndhF	CT	C	-1	high	frameshift variant
340	112437	ndhF	A	AG	1	high	frameshift variant
341	112992	ndhF	A	AT	1	high	frameshift variant
342	112995	ndhF	T	TTTATTA	6	moderate	disruptive inframe insertion
343	112996	ndhF	C	CAT	2	high	frameshift variant
344	112996	ndhF	C	CATTA	4	high	frameshift variant
345	112996	ndhF	C	CTATTTT	6	moderate	conservative inframe insertion
346	112997	ndhF	C	CT	1	high	frameshift variant
347	112998	ndhF	A	ACTATT	5	high	frameshift variant
348	113000	ndhF	T	TC	1	high	frameshift variant
349	113000	ndhF	T	TTTC	3	moderate	conservative inframe insertion
350	113002	ndhF	T	TTAC	3	moderate	conservative inframe insertion
351	113028	ndhF	A	AG	1	high	frameshift variant
352	113031	ndhF	AG	A	-1	high	frameshift variant
353	113090	ndhF	T	TG	1	high	frameshift variant
354	113092	ndhF	T	TCGGG	4	high	frameshift variant
355	113094	ndhF	T	TG	1	high	frameshift variant
356	113095	ndhF	T	TCC	2	high	frameshift variant
357	113100	ndhF	T	TTA	2	high	frameshift variant
358	113100	ndhF	T	TTCTTTA	6	moderate	disruptive inframe insertion
359	115601	rpl32	ATAATAG	A	-6	high	stop lost & conservative inframe deletion & splice region variant
360	117243	ccsA	T	TT	1	high	frameshift variant
361	117689	ccsA	TTTAGTA	T	-6	moderate	conservative inframe deletion
362	117692	ccsA	AGTAT	A	-4	high	frameshift variant
363	117693	ccsA	GTATT	G	-4	high	frameshift variant
364	117697	ccsA	TAG	T	-2	high	frameshift variant
365	117698	ccsA	AGT	A	-2	high	frameshift variant
366	117767	ccsA	T	TTAT	3	moderate	disruptive inframe insertion
367	117769	ccsA	C	CTTT	3	moderate	conservative inframe insertion
368	117769	ccsA	C	CTGT	3	moderate	conservative inframe insertion
369	117770	ccsA	T	TTTC	3	moderate	conservative inframe insertion
370	117770	ccsA	T	TTTG	3	moderate	conservative inframe insertion
371	118114	ccsA	TAACATC	T	-6	moderate	disruptive inframe deletion
372	118116	ccsA	AC	A	-1	high	frameshift variant
373	118124	ccsA	TTG	T	-2	high	frameshift variant & stop lost & splice region variant
374	118126	ccsA	GAATTA	G	-5	high	frameshift variant & stop lost & splice region variant
375	118576	ndhD	C	CATTAAA	6	moderate	conservative inframe insertion
376	118927	ndhD	T	TA	1	high	frameshift variant
377	118930	ndhD	CT	C	-1	high	frameshift variant
378	119121	ndhD	T	TC	1	high	frameshift variant
379	119573	ndhD	G	GA	1	high	frameshift variant
380	122046	ndhI	TC	T	-1	high	frameshift variant
381	122059	ndhI	TTATTTTTTTT	TT	-9	moderate	conservative inframe deletion
382	122059	ndhI	TTATTTTTTTT	TTTT	-7	high	frameshift variant
383	122059	ndhI	TTATTTTTTTT	TTTTTT	-5	high	frameshift variant
384	122059	ndhI	TTATTTTTTTT	TTTTT	-6	moderate	conservative inframe deletion
385	122059	ndhI	TTATTTTTTTT	T	-10	high	frameshift variant
386	122061	ndhI	ATTTTTTTT	ATTTT	-4	high	frameshift variant
387	122061	ndhI	ATTTTTTTT	A	-8	high	frameshift variant
388	122061	ndhI	ATTTTTTTT	ATTT	-5	high	frameshift variant
389	122061	ndhI	ATTTTTTTT	AT	-7	high	frameshift variant
390	122061	ndhI	ATTTTTTTT	ATT	-6	moderate	conservative inframe deletion
391	122068	ndhI	TTTTTTTT	T	-7	high	frameshift variant
392	122069	ndhI	TTTTTTT	T	-6	moderate	conservative inframe deletion
393	122070	ndhI	TTTTTT	T	-5	high	frameshift variant
394	122071	ndhI	TTTTT	T	-4	high	frameshift variant
395	122072	ndhI	TTTT	T	-3	moderate	conservative inframe deletion
396	122073	ndhI	TTT	T	-2	high	frameshift variant
397	122075	ndhI	T	TT	1	high	frameshift variant
398	122635	ndhA	C	CT	1	high	frameshift variant & splice region variant
399	124833	ndhA	TATCTTGTAC	T	-9	moderate	conservative inframe deletion
400	124845	ndhA	C	CTAG	3	moderate	conservative inframe insertion
401	124847	ndhA	G	GTATCTA	6	moderate	conservative inframe insertion
402	125890	ndhH	TT	T	-1	high	frameshift variant
403	125896	ndhH	TC	T	-1	high	frameshift variant
404	125900	ndhH	TC	T	-1	high	frameshift variant
405	125975	ndhH	AC	A	-1	high	frameshift variant
406	125991	ndhH	TG	T	-1	high	frameshift variant
407	125994	ndhH	TG	T	-1	high	frameshift variant
408	126218	rps15	T	TT	1	high	frameshift variant
409	126369	rps15	GTTTTCGTCT	G	-9	moderate	disruptive inframe deletion
410	126987	ycf1	C	CTTT	3	moderate	conservative inframe insertion
411	127028	ycf1	A	ATTCCCC	6	moderate	disruptive inframe insertion
412	127045	ycf1	G	GGATATCATT	9	moderate	conservative inframe insertion
413	127045	ycf1	G	GCATATCATT	9	moderate	conservative inframe insertion
414	127560	ycf1	G	GTTTTTG	6	moderate	conservative inframe insertion
415	127673	ycf1	C	CGCG	3	moderate	disruptive inframe insertion
416	127729	ycf1	TCTCC	T	-4	high	frameshift variant
417	127729	ycf1	TCTCC	TC	-3	moderate	conservative inframe deletion
418	127735	ycf1	ATAT	AAT	-1	high	frameshift variant
419	127735	ycf1	ATAT	A	-3	moderate	conservative inframe deletion
420	127737	ycf1	AT	A	-1	high	frameshift variant
421	127793	ycf1	A	AGTAGCG	6	moderate	disruptive inframe insertion
422	127793	ycf1	A	AGTAACG	6	moderate	disruptive inframe insertion
423	127800	ycf1	TTTA	T	-3	moderate	disruptive inframe deletion
424	127806	ycf1	TTAG	T	-3	moderate	disruptive inframe deletion
425	128027	ycf1	G	GTTATTA	6	moderate	disruptive inframe insertion
426	128069	ycf1	A	AGAT	3	high	stop gained & disruptive inframe insertion
427	128069	ycf1	A	ACAT	3	high	stop gained & disruptive inframe insertion
428	128078	ycf1	ACTGTT	A	-5	high	frameshift variant
429	128084	ycf1	AG	A	-1	high	frameshift variant
430	128209	ycf1	CTAGATAAGGGATAATAGGAATACCTTCCGG	C	-30	moderate	conservative inframe deletion
431	128213	ycf1	A	ATCATTATT	8	high	frameshift variant & stop gained
432	128214	ycf1	T	TCATTATTG	8	high	frameshift variant
433	128214	ycf1	T	TCCTTATTG	8	high	frameshift variant
434	128215	ycf1	A	AT	1	high	frameshift variant
435	128215	ycf1	A	AATTATTGAT	9	moderate	conservative inframe insertion
436	128368	ycf1	A	AATTAATAGATTTATATGCTAA	21	moderate	conservative inframe insertion
437	128411	ycf1	CAGTAAT	C	-6	moderate	disruptive inframe deletion
438	128430	ycf1	A	ATTTTTG	6	moderate	conservative inframe insertion
439	128430	ycf1	A	ATTTTTT	6	high	stop gained & conservative inframe insertion
440	128432	ycf1	A	AATTT	4	high	frameshift variant
441	128434	ycf1	T	TCG	2	high	frameshift variant
442	128434	ycf1	T	TTTTTAG	6	moderate	conservative inframe insertion
443	128434	ycf1	T	TATTTTG	6	moderate	conservative inframe insertion
444	128448	ycf1	AT	A	-1	high	frameshift variant
445	128452	ycf1	A	AT	1	high	frameshift variant
446	128452	ycf1	A	ATT	2	high	frameshift variant
447	128457	ycf1	TCC	TC	-1	high	frameshift variant
448	128457	ycf1	TCC	T	-2	high	frameshift variant
449	128457	ycf1	TCC	TGCC	1	high	frameshift variant
450	128475	ycf1	C	CACAAATCTTTAT	12	moderate	conservative inframe insertion
451	128501	ycf1	GTGTTGA	G	-6	moderate	disruptive inframe deletion
452	128574	ycf1	T	TATTGAT	6	moderate	conservative inframe insertion
453	128575	ycf1	A	ATT	2	high	frameshift variant
454	128576	ycf1	C	CATAA	4	high	frameshift variant
455	128578	ycf1	G	GATAATT	6	moderate	conservative inframe insertion
456	128675	ycf1	AT	A	-1	high	frameshift variant
457	128679	ycf1	T	TC	1	high	frameshift variant
458	128695	ycf1	GAA	G	-2	high	frameshift variant
459	128707	ycf1	T	TGC	2	high	frameshift variant
460	128739	ycf1	T	TAAAA	4	high	frameshift variant
461	128741	ycf1	T	TCG	2	high	frameshift variant
462	128741	ycf1	T	TCC	2	high	frameshift variant
463	128741	ycf1	T	TAA	2	high	frameshift variant
464	128745	ycf1	TTA	T	-2	high	frameshift variant
465	128752	ycf1	GTTGA	G	-4	high	frameshift variant
466	128822	ycf1	A	ATT	2	high	frameshift variant
467	128828	ycf1	G	GAC	2	high	frameshift variant
468	128829	ycf1	T	TGAC	3	moderate	conservative inframe insertion
469	128829	ycf1	T	TAA	2	high	frameshift variant
470	128830	ycf1	T	TAAG	3	moderate	conservative inframe insertion
471	128836	ycf1	T	TATTGGC	6	moderate	conservative inframe insertion
472	128842	ycf1	T	TATTAGT	6	moderate	conservative inframe insertion
473	128842	ycf1	T	TATTAGA	6	moderate	conservative inframe insertion
474	128842	ycf1	T	TATTATA	6	moderate	conservative inframe insertion
475	128842	ycf1	T	TAG	2	high	frameshift variant
476	128843	ycf1	A	ATT	2	high	frameshift variant
477	128843	ycf1	A	ATTATAT	6	moderate	disruptive inframe insertion
478	128844	ycf1	A	AC	1	high	frameshift variant
479	128845	ycf1	G	GTAAA	4	high	frameshift variant
480	128921	ycf1	AT	A	-1	high	frameshift variant
481	128923	ycf1	CGTTAA	C	-5	high	frameshift variant
482	129114	ycf1	TC	T	-1	high	frameshift variant
483	129121	ycf1	C	CT	1	high	frameshift variant
484	129138	ycf1	A	ATTTTGT	6	moderate	conservative inframe insertion
485	129158	ycf1	T	TAAATTT	6	moderate	conservative inframe insertion
486	129169	ycf1	T	TTATAAA	6	moderate	conservative inframe insertion
487	129169	ycf1	T	TTAGAAA	6	moderate	conservative inframe insertion
488	129169	ycf1	T	TTCTAAA	6	moderate	conservative inframe insertion
489	129169	ycf1	T	TTCGAAA	6	moderate	conservative inframe insertion
490	129169	ycf1	T	TTAAAAA	6	moderate	conservative inframe insertion
491	129275	ycf1	A	ATT	2	high	frameshift variant
492	129277	ycf1	C	CGAGGTATAGTTT	12	moderate	conservative inframe insertion
493	129278	ycf1	C	CAA	2	high	frameshift variant
494	129279	ycf1	T	TG	1	high	frameshift variant
495	129281	ycf1	A	AC	1	high	frameshift variant
496	129283	ycf1	A	ATGG	3	moderate	conservative inframe insertion
497	129291	ycf1	T	TCAATGGAC	8	high	frameshift variant
498	129293	ycf1	A	ATGGT	4	high	frameshift variant
499	129295	ycf1	T	TAGTTTCAA	8	high	frameshift variant
500	129296	ycf1	C	CG	1	high	frameshift variant
501	129301	ycf1	A	ATGGTATAGT	9	moderate	conservative inframe insertion
502	129304	ycf1	C	CA	1	high	frameshift variant
503	129307	ycf1	G	GGAC	3	moderate	conservative inframe insertion
504	129309	ycf1	A	AT	1	high	frameshift variant
505	129314	ycf1	C	CAAT	3	moderate	disruptive inframe insertion
506	129315	ycf1	C	CAT	2	high	frameshift variant
507	129316	ycf1	C	CAG	2	high	frameshift variant
508	129324	ycf1	A	ATACCAA	6	moderate	conservative inframe insertion
509	129356	ycf1	ATATACTTCT	A	-9	moderate	disruptive inframe deletion
510	129369	ycf1	TC	T	-1	high	frameshift variant
511	129371	ycf1	TC	T	-1	high	frameshift variant
512	129373	ycf1	TCAA	T	-3	moderate	conservative inframe deletion
513	129374	ycf1	CAATCCA	CTCCA	-2	high	frameshift variant
514	129374	ycf1	CAATCCA	C	-6	moderate	disruptive inframe deletion
515	129377	ycf1	TCCA	T	-3	moderate	disruptive inframe deletion
516	129378	ycf1	CCA	C	-2	high	frameshift variant
517	129382	ycf1	ATCCAAA	A	-6	moderate	conservative inframe deletion
518	129383	ycf1	TCCA	T	-3	moderate	disruptive inframe deletion
519	129391	ycf1	ATAT	A	-3	moderate	conservative inframe deletion
520	129544	ycf1	AT	A	-1	high	frameshift variant
521	129550	ycf1	TTAATTTTTT	T	-9	moderate	conservative inframe deletion
522	129558	ycf1	T	TC	1	high	frameshift variant
523	129563	ycf1	T	TG	1	high	frameshift variant
524	129671	ycf1	AT	A	-1	high	frameshift variant
525	129673	ycf1	CCTTCTT	C	-6	moderate	conservative inframe deletion
526	129676	ycf1	T	TG	1	high	frameshift variant
527	129691	ycf1	C	CATTATA	6	moderate	conservative inframe insertion
528	129699	ycf1	GGGGCTT	G	-6	moderate	disruptive inframe deletion
529	130062	ycf1	T	TG	1	high	frameshift variant
530	130066	ycf1	C	CT	1	high	frameshift variant
531	130067	ycf1	C	CA	1	high	frameshift variant
532	130069	ycf1	C	CACT	3	moderate	conservative inframe insertion
533	130069	ycf1	C	CGCT	3	moderate	conservative inframe insertion
534	130069	ycf1	C	CCTCTTTTTTTTTCGCGCT	18	moderate	conservative inframe insertion
535	130074	ycf1	T	TTTG	3	moderate	conservative inframe insertion
536	130076	ycf1	T	TGTG	3	moderate	disruptive inframe insertion
537	130076	ycf1	T	TGTC	3	moderate	disruptive inframe insertion
538	130082	ycf1	C	CGCGCTTTCTTTTGTCTTTTTA	21	moderate	disruptive inframe insertion
539	130082	ycf1	C	CTCACTTTGTTTTGTCTTCTTT	21	moderate	disruptive inframe insertion
540	130083	ycf1	T	TCGCTTTCTTTTGTGTTTTTCT	21	moderate	conservative inframe insertion
541	130083	ycf1	T	TCACTTTCTT	9	moderate	conservative inframe insertion
542	130083	ycf1	T	TCACTTTCTTTTGTGTTTTTCT	21	moderate	conservative inframe insertion
543	130084	ycf1	C	CGCTTTCTTTTK	11	high	frameshift variant
544	130084	ycf1	C	CACTTTCTTCTG	11	high	frameshift variant
545	130086	ycf1	G	GTTTTTCTCTD	10	high	frameshift variant
546	130086	ycf1	G	GGTTTTCTCTT	10	high	frameshift variant
547	130088	ycf1	A	AGTTTTCTCTT	10	high	frameshift variant&stop gained
548	130089	ycf1	T	TAG	2	high	frameshift variant
549	130097	ycf1	A	AATTGTG	6	moderate	disruptive inframe insertion
550	130098	ycf1	A	ATTTTG	5	high	frameshift variant
551	130099	ycf1	A	AG	1	high	frameshift variant
552	130153	ycf1	TATCAAA	T	-6	moderate	conservative inframe deletion
553	130155	ycf1	TC	T	-1	high	frameshift variant
554	130156	ycf1	C	CMAA	3	moderate	conservative inframe insertion
555					3	moderate	conservative inframe insertion
556	130168	ycf1	AAAA	A	-3	moderate	conservative inframe deletion
557	130170	ycf1	AAAG	A	-3	moderate	disruptive inframe deletion
558	130170	ycf1	AAAG	AAG	-1	high	frameshift variant
559	130171	ycf1	A	AAAA	3	moderate	conservative inframe insertion
560	130541	ycf1	AG	A	-1	high	frameshift variant
561	130546	ycf1	T	TAGA	3	moderate	conservative inframe insertion
562	130548	ycf1	T	TGA	2	high	frameshift variant
563	130553	ycf1	T	TA	1	high	frameshift variant
564	130680	ycf1	CTTGATG	C	-6	moderate	disruptive inframe deletion
565	130727	ycf1	A	AT	1	high	frameshift variant
566	130731	ycf1	ATTTCTGTTACTAATGATTTTCTAT	A	-24	moderate	disruptive inframe deletion
567	130736	ycf1	TG	T	-1	high	frameshift variant
568	130741	ycf1	CTA	C	-2	high	frameshift variant
569	130745	ycf1	TG	T	-1	high	frameshift variant
570	130746	ycf1	GA	G	-1	high	frameshift variant
571	130748	ycf1	TTTTCTATCA	T	-9	moderate	disruptive inframe deletion
572	130751	ycf1	TCTATCA	T	-6	moderate	disruptive inframe deletion
573	130751	ycf1	TCTATCA	TTCA	-3	moderate	disruptive inframe deletion
574	130752	ycf1	CTATCATTTA	C	-9	moderate	disruptive inframe deletion
575	130756	ycf1	CATTTA	C	-5	high	frameshift variant
576	130757	ycf1	ATTTAT	AAT	-3	moderate	disruptive inframe deletion
577	130757	ycf1	ATTTAT	A	-5	high	frameshift variant
578	130763	ycf1	AT	A	-1	high	frameshift variant
579	130765	ycf1	CAAA	CATTTATATCAAA	9	moderate	conservative inframe insertion
580	130765	ycf1	CAAA	C	-3	moderate	conservative inframe deletion
581	130839	ycf1	ACCCTT	A	-5	high	frameshift variant
582	130842	ycf1	C	CTTTCTA	6	moderate	conservative inframe insertion
583	130847	ycf1	TA	T	-1	high	frameshift variant
584	130850	ycf1	G	GTCTATG	6	moderate	conservative inframe insertion
585	130859	ycf1	T	TCTAGA	5	high	frameshift variant
586	130860	ycf1	A	AC	1	high	frameshift variant
587	131023	ycf1	T	TATTTAG	6	moderate	conservative inframe insertion
588	131024	ycf1	A	AGTGAGAG	7	high	frameshift variant
589	131024	ycf1	A	AATGAGAG	7	high	frameshift variant
590	131024	ycf1	A	ATCGAGAGTT	9	moderate	disruptive inframe insertion
591	131026	ycf1	T	TCGC	3	moderate	conservative inframe insertion
592	131027	ycf1	T	TG	1	high	frameshift variant
593	131029	ycf1	G	GATTTAG	6	moderate	conservative inframe insertion
594	131029	ycf1	G	GCT	2	high	frameshift variant
595	131029	ycf1	G	GCTAT	4	high	frameshift variant
596	131031	ycf1	G	GGT	2	high	frameshift variant
597	131058	ycf1	A	AT	1	high	frameshift variant
598	131065	ycf1	TA	T	-1	high	frameshift variant
599	131097	ycf1	CTATAAC	C	-6	moderate	disruptive inframe deletion
600	131129	ycf1	A	ATTAGAG	6	moderate	disruptive inframe insertion
601	131274	ycf1	ACAT	A	-3	moderate	disruptive inframe deletion
602	131279	ycf1	ATTTTC	A	-5	high	frameshift variant
603	131284	ycf1	C	CATTTTC	6	moderate	conservative inframe insertion
604	131288	ycf1	TC	T	-1	high	frameshift variant
605	131372	ycf1	G	GTA	2	high	frameshift variant
606	131374	ycf1	G	GC	1	high	frameshift variant
607	131383	ycf1	TTTTAAA	T	-6	moderate	conservative inframe deletion
608	131383	ycf1	TTTTAAA	TTAAA	-2	high	frameshift variant
609	131383	ycf1	TTTTAAA	TTTCTTTAAA	3	moderate	conservative inframe insertion
610	131395	ycf1	CTAACTT	C	-6	moderate	conservative inframe deletion
611	131454	ycf1	CTA	C	-2	high	frameshift variant
612	131461	ycf1	TATAG	T	-4	high	frameshift variant
613	131471	ycf1	CTCTTTAAAG	C	-9	moderate	disruptive inframe deletion
614	131533	ycf1	CATCGAT	C	-6	moderate	conservative inframe deletion
615	131577	ycf1	GGGGAAG	G	-6	moderate	conservative inframe deletion
616	131658	ycf1	G	GTTTCTTCCTCACTTTCCCCCC	21	moderate	conservative inframe insertion
617	131664	ycf1	T	TCCTCACTTTTCC	12	moderate	conservative inframe insertion
618	131665	ycf1	C	CCTCACTTTCCCCCCTTTCTTC	21	moderate	conservative inframe insertion
619	131665	ycf1	C	CCTCACTTCCCCCCCTTTCTTC	21	moderate	conservative inframe insertion
620	131666	ycf1	CGTTTCTGAG	CTCACTTTCCCCCCTTTCTTCCGTTTCTGAGGTTTCTGAG	30	moderate	disruptive inframe insertion
621	131666	ycf1	CGTTTCTGAG	C	-9	moderate	disruptive inframe deletion
622	131675	ycf1	G	GGTT	3	moderate	disruptive inframe insertion
623	131812	ycf1	TAAGTACATTAGATCTAAT	T	-18	moderate	conservative inframe deletion
624	131830	ycf1	T	TAAGTACATTAGATCTAAT	18	moderate	conservative inframe insertion
625	157780	rps19-fragment	A	AT	1	high	frameshift variant
626	157781	rps19-fragment	TTA	T	-2	high	frameshift variant
627	157782	rps19-fragment	T	TTAA	3	high	stop gained & conservative inframe insertion
628	157783	rps19-fragment	A	AT	1	high	frameshift variant & stop gained
629	157784	rps19-fragment	T	TA	1	high	frameshift variant
630	157787	rps19-fragment	A	AT	1	high	frameshift variant
631	157788	rps19-fragment	AAAGT	A	-4	high	frameshift variant
632	157788	rps19-fragment	AAAGT	ATAAGT	1	high	frameshift variant & stop gained
633	157794	rps19-fragment	T	TA	1	high	frameshift variant
634	157795	rps19-fragment	T	TG	1	high	frameshift variant
635	157800	rps19-fragment	T	TCTA	3	moderate	conservative inframe insertion
Note: the insertion and deletion with tree-muptiple size were marked with green (moderate and low effects) and yellow (high effects). The InDels with length of three multiples had moderate and low effects on protein-coding genes, among which 35% led to disruptive inframe InDels and 64% led to conservative inframe InDels.

## Sheet: Supplementary Table 13
Supplementary Table 13 The GC contents in plastid genes and intergenic regions of Rosaceae plastomes
Genes	Types	Family Rosaceae	Subfamily Rosoideae	Subfamily Amygdaloideae	Tribe Amygdaleae	Tribe Maleae	Tribe Spiraeeae	Tribe Exochordeae
trnG-UCC	tRNA	0.3240±0.0022	0.3317±0.0042	0.3239±0.0018	0.3236±0.0009	0.3277±0.0014	0.3229±0.0000	0.3142±0.0000
trnK-UUU	tRNA	0.3284±0.0015	0.3341±0.0013	0.3283±0.0012	0.3283±0.0012	0.3277±0.0010	0.3275±0.0000	0.3280±0.0000
trnL-UAA	tRNA	0.3515±0.0034	0.3451±0.0167	0.3517±0.0024	0.3522±0.0014	0.3472±0.0016	0.3544±0.0000	0.3366±0.0000
trnV-UAC	tRNA	0.3810±0.0027	0.3889±0.0034	0.3808±0.0024	0.3802±0.0013	0.3872±0.0014	0.3830±0.0000	0.3765±0.0000
trnM-CAU	tRNA	0.4167±0.0000	0.4167±0.0000	0.4167±0.0000	0.4167±0.0000	0.4167±0.0000	0.4167±0.0000	0.4167±0.0000
trnR-UCU	tRNA	0.4302±0.0028	0.4306±0.0000	0.4302±0.0029	0.4306±0.0000	0.4264±0.0094	0.4306±0.0000	0.4306±0.0000
trnI-CAU	tRNA	0.4595±0.0000	0.4595±0.0000	0.4595±0.0000	0.4595±0.0000	0.4595±0.0000	0.4595±0.0000	0.4595±0.0000
trnP-UGG	tRNA	0.4856±0.0045	0.5000±0.0000	0.4852±0.0040	0.4865±0.0000	0.4730±0.0000	0.4865±0.0000	0.4730±0.0000
trnT-GGU	tRNA	0.4861±0.0000	0.4861±0.0000	0.4861±0.0000	0.4861±0.0000	0.4861±0.0000	0.4861±0.0000	0.4861±0.0000
trnV-GAC	tRNA	0.4861±0.0000	0.4861±0.0000	0.4861±0.0000	0.4861±0.0000	0.4861±0.0000	0.4861±0.0000	0.4861±0.0000
trnI-GAU	tRNA	0.4934±0.0007	0.4963±0.0003	0.4934±0.0005	0.4933±0.0004	0.4941±0.0000	0.4936±0.0000	0.4956±0.0000
trnS-UGA	tRNA	0.4949±0.0017	0.5054±0.0000	0.4946±0.0000	0.4946±0.0000	0.4946±0.0000	0.4946±0.0000	0.4946±0.0000
trnG-GCC	tRNA	0.5068±0.0026	0.5070±0.0000	0.5068±0.0026	0.5066±0.0023	0.5085±0.0045	0.5070±0.0000	0.5070±0.0000
trnS-GGA	tRNA	0.5068±0.0033	0.5172±0.0000	0.5065±0.0029	0.5057±0.0000	0.5138±0.0056	0.5058±0.0000	0.5172±0.0000
trnS-GCU	tRNA	0.5116±0.0015	0.5152±0.0066	0.5115±0.0011	0.5114±0.0000	0.5114±0.0000	0.5114±0.0000	0.5227±0.0000
trnA-UGC	tRNA	0.5124±0.0009	0.5075±0.0013	0.5125±0.0003	0.5125±0.0001	0.5125±0.0007	0.5142±0.0000	0.5102±0.0000
trnW-CCA	tRNA	0.5142±0.0046	0.5135±0.0000	0.5142±0.0046	0.5133±0.0026	0.5230±0.0091	0.5270±0.0000	0.5135±0.0000
trnL-CAA	tRNA	0.5182±0.0019	0.5062±0.0000	0.5185±0.0000	0.5185±0.0000	0.5185±0.0000	0.5185±0.0000	0.5185±0.0000
trnF-GAA	tRNA	0.5204±0.0012	0.5206±0.0000	0.5204±0.0013	0.5204±0.0013	0.5206±0.0000	0.5206±0.0000	0.5205±0.0000
trnT-UGU	tRNA	0.5342±0.0035	0.5251±0.0079	0.5345±0.0031	0.5342±0.0000	0.5329±0.0043	0.5616±0.0000	0.5479±0.0000
trnN-GUU	tRNA	0.5429±0.0040	0.5417±0.0000	0.5430±0.0041	0.5418±0.0013	0.5556±0.0000	0.5417±0.0000	0.5417±0.0000
trnY-GUA	tRNA	0.5480±0.0021	0.5476±0.0000	0.5480±0.0022	0.5480±0.0020	0.5476±0.0000	0.5595±0.0000	0.5476±0.0000
trnL-UAG	tRNA	0.5636±0.0046	0.5708±0.0072	0.5635±0.0044	0.5629±0.0021	0.5688±0.0122	0.5750±0.0000	0.5625±0.0000
trnH-GUG	tRNA	0.5730±0.0050	0.5867±0.0000	0.5727±0.0046	0.5725±0.0046	0.5733±0.0000	0.5867±0.0000	0.5733±0.0000
trnC-GCA	tRNA	0.5815±0.0043	0.5803±0.0000	0.5815±0.0044	0.5818±0.0041	0.5790±0.0039	0.5926±0.0000	0.5679±0.0000
trnfM-CAU	tRNA	0.5946±0.0000	0.5946±0.0000	0.5946±0.0000	0.5946±0.0000	0.5946±0.0000	0.5946±0.0000	0.5946±0.0000
trnQ-UUG	tRNA	0.5975±0.0018	0.6019±0.0080	0.5973±0.0013	0.5974±0.0013	0.5972±0.0000	0.5972±0.0000	0.5972±0.0000
trnE-UUC	tRNA	0.6027±0.0018	0.6027±0.0137	0.6027±0.0000	0.6027±0.0000	0.6027±0.0000	0.6027±0.0000	0.6027±0.0000
trnD-GUC	tRNA	0.6214±0.0017	0.6216±0.0000	0.6214±0.0018	0.6216±0.0000	0.6203±0.0043	0.6216±0.0000	0.6081±0.0000
trnR-ACG	tRNA	0.6216±0.0000	0.6216±0.0000	0.6216±0.0000	0.6216±0.0000	0.6216±0.0000	0.6216±0.0000	0.6216±0.0000
rrn4	rRNA	0.5051±0.0016	0.5032±0.0028	0.5051±0.0015	0.5051±0.0016	0.5049±0.0000	0.5049±0.0000	0.5049±0.0000
rrn5	rRNA	0.5207±0.0000	0.5207±0.0000	0.5207±0.0000	0.5207±0.0000	0.5207±0.0000	0.5207±0.0000	0.5207±0.0000
rrn23	rRNA	0.5530±0.0005	0.5510±0.0004	0.5530±0.0005	0.5529±0.0001	0.5544±0.0002	0.5514±0.0000	0.5531±0.0000
rrn16	rRNA	0.5647±0.0001	0.5645±0.0008	0.5647±0.0001	0.5647±0.0001	0.5647±0.0000	0.5654±0.0000	0.5647±0.0000
ycf1	protein-coding region	0.2946±0.0071	0.3042±0.0023	0.2944±0.0070	0.2937±0.0060	0.3010±0.0126	0.2984±0.0000	0.2909±0.0000
rps19-fragment	protein-coding region	0.3017±0.0294	0.7620±0.0310	0.3017±0.0294	0.3120±0.0282	0.2821±0.0210	0.2917±0.0000	0.3333±0.0000
rps15	protein-coding region	0.3155±0.0054	0.3089±0.0056	0.3156±0.0054	0.3172±0.0022	0.3004±0.0017	0.3004±0.0000	0.3144±0.0000
ndhF	protein-coding region	0.3170±0.0019	0.3241±0.0045	0.3168±0.0014	0.3167±0.0014	0.3178±0.0010	0.3166±0.0000	0.3177±0.0000
matK	protein-coding region	0.3222±0.0018	0.3298±0.0028	0.3220±0.0013	0.3220±0.0012	0.3219±0.0009	0.3175±0.0000	0.3247±0.0000
ccsA	protein-coding region	0.3235±0.0076	0.2996±0.0495	0.3241±0.0016	0.3240±0.0006	0.3226±0.0016	0.3330±0.0000	0.3354±0.0000
psbM	protein-coding region	0.3238±0.0043	0.3238±0.0000	0.3238±0.0043	0.3246±0.0032	0.3143±0.0000	0.3243±0.0000	0.3333±0.0000
infA	protein-coding region	0.3248±0.0054	0.3216±0.0315	0.3249±0.0036	0.3255±0.0020	0.3177±0.0023	0.3125±0.0000	0.3432±0.0000
cemA	protein-coding region	0.3266±0.0021	0.3217±0.0015	0.3267±0.0020	0.3272±0.0013	0.3233±0.0011	0.3145±0.0000	0.3232±0.0000
rps8	protein-coding region	0.3282±0.0067	0.3580±0.0065	0.3275±0.0047	0.3260±0.0007	0.3410±0.0018	0.3482±0.0000	0.3235±0.0000
ndhA	protein-coding region	0.3305±0.0028	0.3176±0.0054	0.3308±0.0018	0.3313±0.0010	0.3277±0.0017	0.3237±0.0000	0.3213±0.0000
rps16	protein-coding region	0.3318±0.0035	0.3440±0.0012	0.3315±0.0029	0.3313±0.0015	0.3357±0.0037	0.3208±0.0000	0.3141±0.0000
rps18	protein-coding region	0.3326±0.0074	0.3529±0.0033	0.3321±0.0067	0.3304±0.0040	0.3498±0.0010	0.3431±0.0000	0.3267±0.0000
psbL	protein-coding region	0.3328±0.0030	0.3248±0.0000	0.3330±0.0027	0.3333±0.0022	0.3333±0.0000	0.3162±0.0000	0.3248±0.0000
rpl32	protein-coding region	0.3341±0.0041	0.3438±0.0145	0.3338±0.0033	0.3341±0.0022	0.3340±0.0020	0.3270±0.0000	0.3082±0.0000
psbT	protein-coding region	0.3342±0.0032	0.3366±0.0057	0.3341±0.0031	0.3333±0.0000	0.3435±0.0029	0.3333±0.0000	0.3241±0.0000
ndhI	protein-coding region	0.3384±0.0056	0.3287±0.0064	0.3387±0.0054	0.3372±0.0028	0.3531±0.0024	0.3453±0.0000	0.3490±0.0000
ndhE	protein-coding region	0.3387±0.0048	0.3519±0.0076	0.3384±0.0043	0.3371±0.0018	0.3500±0.0010	0.3431±0.0000	0.3529±0.0000
clpP	protein-coding region	0.3414±0.0045	0.3486±0.0016	0.3412±0.0044	0.3412±0.0014	0.3359±0.0014	0.3814±0.0000	0.3522±0.0000
rpoA	protein-coding region	0.3442±0.0016	0.3430±0.0065	0.3443±0.0014	0.3446±0.0008	0.3409±0.0010	0.3424±0.0000	0.3476±0.0000
accD	protein-coding region	0.3452±0.0024	0.3578±0.0022	0.3449±0.0012	0.3448±0.0009	0.3455±0.0008	0.3442±0.0000	0.3543±0.0000
rps19	protein-coding region	0.3462±0.0045	0.3513±0.0036	0.3460±0.0045	0.3447±0.0020	0.3588±0.0020	0.3513±0.0000	0.3548±0.0000
rpl20	protein-coding region	0.3466±0.0037	0.3333±0.0028	0.3469±0.0030	0.3477±0.0015	0.3396±0.0018	0.3333±0.0000	0.3503±0.0000
rpl16	protein-coding region	0.3482±0.0057	0.3327±0.0267	0.3486±0.0038	0.3487±0.0037	0.3477±0.0010	0.3593±0.0000	0.3362±0.0000
atpF	protein-coding region	0.3494±0.0046	0.3724±0.0038	0.3489±0.0028	0.3494±0.0024	0.3438±0.0015	0.3445±0.0000	0.3465±0.0000
ycf1-fragment	protein-coding region	0.3500±0.0027	0.3583±0.0048	0.3498±0.0023	0.3493±0.0020	0.3540±0.0005	0.3527±0.0000	0.3520±0.0000
psaI	protein-coding region	0.3509±0.0042	0.3363±0.0051	0.3513±0.0034	0.3505±0.0019	0.3605±0.0028	0.3509±0.0000	0.3509±0.0000
rpl22	protein-coding region	0.3517±0.0055	0.3782±0.0057	0.3510±0.0035	0.3509±0.0022	0.3491±0.0018	0.3795±0.0000	0.3570±0.0000
rps3	protein-coding region	0.3531±0.0018	0.3521±0.0047	0.3531±0.0018	0.3532±0.0012	0.3521±0.0016	0.3455±0.0000	0.3638±0.0000
ndhG	protein-coding region	0.3536±0.0019	0.3471±0.0011	0.3538±0.0016	0.3542±0.0009	0.3501±0.0006	0.3578±0.0000	0.3465±0.0000
ndhD	protein-coding region	0.3547±0.0013	0.3590±0.0037	0.3546±0.0010	0.3543±0.0006	0.3568±0.0009	0.3526±0.0000	0.3565±0.0000
petB	protein-coding region	0.3573±0.0015	0.3573±0.0024	0.3573±0.0015	0.3571±0.0014	0.3578±0.0009	0.3596±0.0000	0.3647±0.0000
petG	protein-coding region	0.3587±0.0037	0.3421±0.0088	0.3591±0.0024	0.3596±0.0000	0.3561±0.0045	0.3509±0.0000	0.3421±0.0000
ndhC	protein-coding region	0.3607±0.0021	0.3673±0.0057	0.3605±0.0017	0.3609±0.0005	0.3557±0.0016	0.3636±0.0000	0.3581±0.0000
psbI	protein-coding region	0.3607±0.0023	0.3694±0.0090	0.3604±0.0014	0.3604±0.0009	0.3604±0.0043	0.3604±0.0000	0.3604±0.0000
psbZ	protein-coding region	0.3610±0.0037	0.3686±0.0122	0.3608±0.0031	0.3598±0.0005	0.3693±0.0022	0.3757±0.0000	0.3651±0.0000
ycf3	protein-coding region	0.3621±0.0020	0.3543±0.0061	0.3623±0.0013	0.3624±0.0010	0.3599±0.0011	0.3608±0.0000	0.3677±0.0000
petL	protein-coding region	0.3630±0.0040	0.3646±0.0000	0.3630±0.0040	0.3639±0.0030	0.3542±0.0000	0.3542±0.0000	0.3646±0.0000
psbK	protein-coding region	0.3659±0.0027	0.3692±0.0112	0.3658±0.0023	0.3665±0.0011	0.3602±0.0000	0.3611±0.0000	0.3548±0.0000
rpoC2	protein-coding region	0.3687±0.0017	0.3766±0.0012	0.3685±0.0011	0.3682±0.0005	0.3716±0.0003	0.3707±0.0000	0.3721±0.0000
rpl23	protein-coding region	0.3727±0.0014	0.3794±0.0000	0.3725±0.0009	0.3725±0.0008	0.3727±0.0011	0.3688±0.0000	0.3723±0.0000
ycf2	protein-coding region	0.3738±0.0010	0.3740±0.0008	0.3738±0.0010	0.3737±0.0010	0.3744±0.0001	0.3733±0.0000	0.3753±0.0000
petD	protein-coding region	0.3755±0.0011	0.3796±0.0007	0.3754±0.0008	0.3754±0.0007	0.3750±0.0009	0.3706±0.0000	0.3776±0.0000
rpoC1	protein-coding region	0.3756±0.0020	0.3849±0.0043	0.3753±0.0011	0.3751±0.0006	0.3784±0.0011	0.3747±0.0000	0.3738±0.0000
ndhB	protein-coding region	0.3789±0.0006	0.3788±0.0011	0.3789±0.0006	0.3788±0.0003	0.3806±0.0003	0.3800±0.0000	0.3783±0.0000
rps2	protein-coding region	0.3792±0.0025	0.3905±0.0045	0.3789±0.0017	0.3785±0.0007	0.3837±0.0009	0.3798±0.0000	0.3755±0.0000
ndhH	protein-coding region	0.3792±0.0031	0.3907±0.0042	0.3789±0.0024	0.3782±0.0012	0.3853±0.0006	0.3790±0.0000	0.3883±0.0000
atpI	protein-coding region	0.3793±0.0021	0.3705±0.0047	0.3795±0.0015	0.3796±0.0012	0.3797±0.0007	0.3723±0.0000	0.3723±0.0000
rpl33	protein-coding region	0.3822±0.0036	0.3881±0.0050	0.3820±0.0035	0.3830±0.0014	0.3736±0.0016	0.3781±0.0000	0.3632±0.0000
ndhJ	protein-coding region	0.3829±0.0033	0.3948±0.0032	0.3826±0.0027	0.3818±0.0009	0.3899±0.0014	0.3899±0.0000	0.3920±0.0000
ycf4	protein-coding region	0.3845±0.0040	0.4012±0.0052	0.3841±0.0030	0.3849±0.0015	0.3759±0.0023	0.3856±0.0000	0.3802±0.0000
rpl36	protein-coding region	0.3847±0.0048	0.3772±0.0152	0.3849±0.0043	0.3860±0.0021	0.3746±0.0042	0.3684±0.0000	0.3947±0.0000
rpoB	protein-coding region	0.3873±0.0009	0.3915±0.0014	0.3872±0.0006	0.3871±0.0005	0.3879±0.0007	0.3878±0.0000	0.3894±0.0000
ndhK	protein-coding region	0.3910±0.0023	0.4028±0.0034	0.3907±0.0012	0.3907±0.0012	0.3910±0.0016	0.3921±0.0000	0.3921±0.0000
rps4	protein-coding region	0.3926±0.0016	0.3949±0.0010	0.3925±0.0016	0.3926±0.0013	0.3913±0.0005	0.3878±0.0000	0.4010±0.0000
rpl14	protein-coding region	0.3936±0.0043	0.4011±0.0072	0.3934±0.0041	0.3923±0.0016	0.4057±0.0013	0.3902±0.0000	0.3957±0.0000
psbE	protein-coding region	0.3938±0.0028	0.3982±0.0061	0.3937±0.0027	0.3930±0.0013	0.4012±0.0013	0.3929±0.0000	0.3889±0.0000
rps12	protein-coding region	0.3965±0.0007	0.3970±0.0009	0.3965±0.0007	0.3967±0.0002	0.3942±0.0000	0.3955±0.0000	0.3955±0.0000
psaJ	protein-coding region	0.3974±0.0047	0.3840±0.0144	0.3977±0.0038	0.3976±0.0039	0.3985±0.0031	0.3926±0.0000	0.4000±0.0000
psbJ	protein-coding region	0.3988±0.0065	0.3659±0.0081	0.3996±0.0038	0.4000±0.0036	0.3976±0.0026	0.3902±0.0000	0.3902±0.0000
psbH	protein-coding region	0.4002±0.0027	0.3941±0.0168	0.4003±0.0013	0.4003±0.0013	0.4000±0.0000	0.4000±0.0000	0.4044±0.0000
rps7	protein-coding region	0.4016±0.0021	0.3950±0.0117	0.4018±0.0010	0.4016±0.0005	0.4039±0.0000	0.3974±0.0000	0.4060±0.0000
psbF	protein-coding region	0.4056±0.0056	0.3972±0.0048	0.4058±0.0055	0.4074±0.0029	0.3917±0.0000	0.3917±0.0000	0.3917±0.0000
psaB	protein-coding region	0.4060±0.0009	0.4098±0.0030	0.4059±0.0006	0.4058±0.0004	0.4070±0.0007	0.4036±0.0000	0.4054±0.0000
rpl2	protein-coding region	0.4085±0.0008	0.4095±0.0010	0.4085±0.0008	0.4083±0.0006	0.4101±0.0005	0.4076±0.0000	0.4097±0.0000
petA	protein-coding region	0.4095±0.0014	0.4154±0.0000	0.4094±0.0011	0.4092±0.0006	0.4101±0.0009	0.4180±0.0000	0.4102±0.0000
atpA	protein-coding region	0.4095±0.0027	0.4193±0.0024	0.4093±0.0022	0.4099±0.0010	0.4030±0.0006	0.4055±0.0000	0.4114±0.0000
petN	protein-coding region	0.4120±0.0037	0.4074±0.0064	0.4122±0.0036	0.4112±0.0019	0.4211±0.0035	0.4111±0.0000	0.4222±0.0000
atpE	protein-coding region	0.4122±0.0037	0.4135±0.0076	0.4122±0.0036	0.4132±0.0017	0.4020±0.0017	0.4105±0.0000	0.4080±0.0000
psbA	protein-coding region	0.4152±0.0011	0.4159±0.0030	0.4152±0.0010	0.4153±0.0004	0.4138±0.0009	0.4115±0.0000	0.4228±0.0000
rps14	protein-coding region	0.4161±0.0014	0.4169±0.0019	0.4161±0.0014	0.4162±0.0012	0.4158±0.0016	0.4092±0.0000	0.4158±0.0000
atpB	protein-coding region	0.4268±0.0018	0.4224±0.0027	0.4270±0.0016	0.4273±0.0009	0.4229±0.0008	0.4233±0.0000	0.4300±0.0000
psaC	protein-coding region	0.4274±0.0030	0.4241±0.0124	0.4275±0.0025	0.4269±0.0010	0.4346±0.0013	0.4187±0.0000	0.4309±0.0000
psbD	protein-coding region	0.4277±0.0010	0.4325±0.0014	0.4276±0.0006	0.4276±0.0004	0.4272±0.0006	0.4284±0.0000	0.4228±0.0000
psaA	protein-coding region	0.4289±0.0012	0.4338±0.0031	0.4287±0.0008	0.4288±0.0007	0.4282±0.0006	0.4248±0.0000	0.4288±0.0000
rbcL	protein-coding region	0.4364±0.0024	0.4323±0.0039	0.4365±0.0023	0.4371±0.0015	0.4310±0.0012	0.4321±0.0000	0.4349±0.0000
psbB	protein-coding region	0.4365±0.0011	0.4396±0.0027	0.4364±0.0010	0.4362±0.0006	0.4388±0.0005	0.4335±0.0000	0.4348±0.0000
psbN	protein-coding region	0.4389±0.0032	0.4495±0.0044	0.4386±0.0027	0.4395±0.0007	0.4318±0.0000	0.4318±0.0000	0.4242±0.0000
rps12	protein-coding region	0.4395±0.0037	0.4357±0.0051	0.4396±0.0036	0.4385±0.0008	0.4500±0.0042	0.4470±0.0000	0.4386±0.0000
psbC	protein-coding region	0.4454±0.0012	0.4447±0.0008	0.4455±0.0012	0.4458±0.0005	0.4432±0.0014	0.4409±0.0000	0.4388±0.0000
rps11	protein-coding region	0.4483±0.0032	0.4572±0.0028	0.4481±0.0029	0.4484±0.0006	0.4413±0.0000	0.4580±0.0000	0.4676±0.0000
atpH	protein-coding region	0.4894±0.0078	0.4566±0.0085	0.4902±0.0058	0.4919±0.0021	0.4768±0.0027	0.4630±0.0000	0.4675±0.0000
trnR-UCU - atpA	intergenic region	0.1039±0.0195	0.1620±0.0097	0.1024±0.0172	0.1010±0.0164	0.1121±0.0190	0.1137±0.0000	0.1451±0.0000
rps19-fragment - trnH-GUG	intergenic region	0.1104±0.1243	0.7620±0.0310	0.1104±0.1243	0.1465±0.1480	0.0516±0.0240	0.0714±0.0000	0.1368±0.0000
trnG-UCC - trnR-UCU	intergenic region	0.1382±0.0190	0.1867±0.0140	0.1369±0.0175	0.1323±0.0083	0.1821±0.0078	0.2025±0.0000	0.1103±0.0000
ndhC - trnV-UAC	intergenic region	0.1781±0.0167	0.2313±0.0087	0.1768±0.0145	0.1740±0.0117	0.1995±0.0116	0.2237±0.0000	0.2000±0.0000
rpl32 - trnL-UAG	intergenic region	0.1797±0.0349	0.2321±0.0099	0.1784±0.0343	0.1734±0.0324	0.2206±0.0054	0.2434±0.0000	0.2189±0.0000
rpoA- rps11	intergenic region	0.1878±0.0050	0.2090±0.0098	0.1872±0.0035	0.1876±0.0015	0.1875±0.0000	0.1719±0.0000	0.1563±0.0000
rpl22 - rps19	intergenic region	0.1956±0.0161	0.1679±0.0055	0.1963±0.0157	0.1954±0.0153	0.1980±0.0054	0.2090±0.0000	0.2553±0.0000
ndhI - ndhA	intergenic region	0.1998±0.0138	0.2226±0.0266	0.1992±0.0130	0.1952±0.0046	0.2367±0.0068	0.2326±0.0000	0.2113±0.0000
rps19 - rpl2	intergenic region	0.2031±0.0081	0.2174±0.0060	0.2027±0.0079	0.2007±0.0041	0.2234±0.0081	0.2143±0.0000	0.2000±0.0000
trnH-GUG - psbA	intergenic region	0.2115±0.0050	0.2177±0.0033	0.2113±0.0049	0.2117±0.0035	0.2113±0.0067	0.1782±0.0000	0.2061±0.0000
rpl2 - rps19-fragment	intergenic region	0.2118±0.0131	0.7620±0.0310	0.2118±0.0131	0.2048±0.0100	0.2245±0.0079	0.2143±0.0000	0.2000±0.0000
trnT-UGU - trnL-UAA	intergenic region	0.2157±0.0201	0.2401±0.0115	0.2151±0.0200	0.2143±0.0208	0.2207±0.0040	0.2292±0.0000	0.2243±0.0000
trnQ-UUG - psbK	intergenic region	0.2172±0.0038	0.2187±0.0088	0.2172±0.0037	0.2172±0.0037	0.2170±0.0026	0.2217±0.0000	0.2129±0.0000
rpl2 - rpl23	intergenic region	0.2218±0.0051	0.2222±0.0000	0.2218±0.0051	0.2222±0.0000	0.2222±0.0000	0.2222±0.0000	0.1667±0.0000
rpl23 - rpl2	intergenic region	0.2218±0.0051	0.2222±0.0000	0.2218±0.0051	0.2222±0.0000	0.2222±0.0000	0.2222±0.0000	0.1667±0.0000
accD - psaI	intergenic region	0.2265±0.0087	0.1809±0.0090	0.2277±0.0046	0.2268±0.0034	0.2347±0.0067	0.2443±0.0000	0.2334±0.0000
rps4 - trnT-UGU	intergenic region	0.2293±0.0107	0.2357±0.0429	0.2291±0.0092	0.2269±0.0063	0.2491±0.0080	0.2500±0.0000	0.2373±0.0000
ndhG - ndhI	intergenic region	0.2302±0.0070	0.2486±0.0167	0.2298±0.0061	0.2283±0.0036	0.2440±0.0029	0.2178±0.0000	0.2520±0.0000
rpl16 - rps3	intergenic region	0.2312±0.0067	0.2136±0.0206	0.2317±0.0056	0.2329±0.0037	0.2215±0.0055	0.2051±0.0000	0.2292±0.0000
trnK-UUU - rps16	intergenic region	0.2317±0.0051	0.2573±0.0074	0.2310±0.0030	0.2312±0.0029	0.2293±0.0037	0.2349±0.0000	0.2271±0.0000
psbI - trnS-GCU	intergenic region	0.2324±0.0098	0.2327±0.0105	0.2324±0.0098	0.2299±0.0064	0.2525±0.0032	0.2482±0.0000	0.2761±0.0000
atpA - atpF	intergenic region	0.2329±0.0162	0.2756±0.0019	0.2318±0.0149	0.2271±0.0043	0.2773±0.0045	0.2593±0.0000	0.2407±0.0000
psbZ - trnG-GCC	intergenic region	0.2334±0.0253	0.2206±0.0258	0.2337±0.0253	0.2403±0.0124	0.1627±0.0108	0.2784±0.0000	0.2076±0.0000
rps3 - rpl22	intergenic region	0.2353±0.0149	0.2843±0.0082	0.2341±0.0128	0.2325±0.0031	0.2351±0.0055	0.2527±0.0000	0.3659±0.0000
rpl14 - rpl16	intergenic region	0.2356±0.0065	0.2271±0.0056	0.2358±0.0064	0.2361±0.0064	0.2357±0.0048	0.2238±0.0000	0.2254±0.0000
petD - rpoA	intergenic region	0.2363±0.0097	0.2491±0.0118	0.2360±0.0095	0.2329±0.0026	0.2634±0.0057	0.2644±0.0000	0.2511±0.0000
psaC - ndhE	intergenic region	0.2379±0.0068	0.2638±0.0175	0.2372±0.0049	0.2363±0.0042	0.2460±0.0028	0.2446±0.0000	0.2369±0.0000
ndhF - rpl32	intergenic region	0.2379±0.0073	0.2334±0.0208	0.2380±0.0068	0.2401±0.0026	0.2199±0.0036	0.2308±0.0000	0.2108±0.0000
psbN - psbH	intergenic region	0.2382±0.0029	0.2401±0.0049	0.2382±0.0028	0.2373±0.0000	0.2458±0.0000	0.2542±0.0000	0.2373±0.0000
rps12 - clpP	intergenic region	0.2391±0.0077	0.2430±0.0085	0.2390±0.0077	0.2387±0.0046	0.2341±0.0123	0.2606±0.0000	0.2899±0.0000
rps16 - trnQ-UUG	intergenic region	0.2409±0.0078	0.2245±0.0078	0.2413±0.0074	0.2411±0.0076	0.2431±0.0033	0.2471±0.0000	0.2419±0.0000
rps8 - rpl14	intergenic region	0.2462±0.0176	0.2424±0.0080	0.2463±0.0178	0.2519±0.0021	0.1900±0.0104	0.2258±0.0000	0.2370±0.0000
rps15 - ycf1	intergenic region	0.2464±0.0085	0.2786±0.0081	0.2456±0.0068	0.2438±0.0039	0.2631±0.0047	0.2575±0.0000	0.2554±0.0000
ndhK - ndhC	intergenic region	0.2491±0.0114	0.3004±0.0289	0.2478±0.0070	0.2459±0.0018	0.2638±0.0048	0.2453±0.0000	0.2955±0.0000
rps11 - rpl36	intergenic region	0.2514±0.0084	0.2903±0.0059	0.2504±0.0057	0.2517±0.0036	0.2381±0.0073	0.2346±0.0000	0.2483±0.0000
ndhE - ndhG	intergenic region	0.2516±0.0097	0.2393±0.0029	0.2519±0.0096	0.2522±0.0098	0.2526±0.0029	0.2357±0.0000	0.2346±0.0000
trnG-GCC - trnfM-CAU	intergenic region	0.2571±0.0118	0.2975±0.0212	0.2561±0.0096	0.2541±0.0067	0.2772±0.0081	0.2421±0.0000	0.2727±0.0000
trnP-UGG - psaJ	intergenic region	0.2573±0.0051	0.2567±0.0146	0.2573±0.0048	0.2559±0.0024	0.2702±0.0025	0.2694±0.0000	0.2614±0.0000
atpI - rps2	intergenic region	0.2598±0.0054	0.2567±0.0076	0.2599±0.0054	0.2582±0.0021	0.2741±0.0020	0.2698±0.0000	0.2813±0.0000
ndhH - rps15	intergenic region	0.2598±0.0126	0.2450±0.0133	0.2602±0.0124	0.2631±0.0089	0.2327±0.0087	0.2407±0.0000	0.2451±0.0000
psbA - trnK-UUU	intergenic region	0.2602±0.0066	0.2712±0.0114	0.2599±0.0062	0.2611±0.0037	0.2468±0.0113	0.2691±0.0000	0.2559±0.0000
trnW-CCA - trnP-UGG	intergenic region	0.2635±0.0165	0.2853±0.0206	0.2629±0.0161	0.2676±0.0043	0.2121±0.0032	0.2647±0.0000	0.2734±0.0000
petL - petG	intergenic region	0.2656±0.0060	0.2785±0.0057	0.2653±0.0057	0.2640±0.0028	0.2792±0.0053	0.2480±0.0000	0.2813±0.0000
petN - psbM	intergenic region	0.2712±0.0032	0.2816±0.0016	0.2709±0.0028	0.2709±0.0015	0.2719±0.0019	0.2508±0.0000	0.2850±0.0000
trnF-GAA - ndhJ	intergenic region	0.2717±0.0094	0.3151±0.0022	0.2706±0.0064	0.2691±0.0039	0.2875±0.0032	0.2610±0.0000	0.2710±0.0000
ccsA - ndhD	intergenic region	0.2725±0.0099	0.2925±0.0369	0.2720±0.0081	0.2743±0.0031	0.2496±0.0070	0.2756±0.0000	0.2454±0.0000
trnM-CAU - atpE	intergenic region	0.2728±0.0140	0.3434±0.0078	0.2710±0.0083	0.2686±0.0029	0.2965±0.0032	0.2741±0.0000	0.2654±0.0000
rpoB - trnC-GCA	intergenic region	0.2741±0.0029	0.2860±0.0039	0.2738±0.0022	0.2740±0.0020	0.2715±0.0024	0.2691±0.0000	0.2720±0.0000
trnT-GGU - psbD	intergenic region	0.2751±0.0108	0.2844±0.0051	0.2749±0.0108	0.2765±0.0093	0.2574±0.0115	0.2722±0.0000	0.2799±0.0000
trnV-UAC - trnM-CAU	intergenic region	0.2755±0.0033	0.2741±0.0106	0.2756±0.0031	0.2758±0.0026	0.2739±0.0024	0.2840±0.0000	0.2604±0.0000
rbcL - accD	intergenic region	0.2803±0.0067	0.3046±0.0019	0.2797±0.0055	0.2785±0.0038	0.2925±0.0038	0.2887±0.0000	0.2733±0.0000
petB - petD	intergenic region	0.2822±0.0051	0.2714±0.0118	0.2825±0.0046	0.2835±0.0012	0.2773±0.0040	0.2746±0.0000	0.2412±0.0000
atpF - atpH	intergenic region	0.2834±0.0036	0.2897±0.0078	0.2833±0.0033	0.2836±0.0027	0.2801±0.0066	0.2766±0.0000	0.2854±0.0000
rpl36 - infA	intergenic region	0.2838±0.0100	0.2428±0.0344	0.2849±0.0062	0.2863±0.0032	0.2716±0.0074	0.2933±0.0000	0.2569±0.0000
clpP - psbB	intergenic region	0.2851±0.0035	0.3010±0.0085	0.2847±0.0022	0.2848±0.0018	0.2836±0.0021	0.2765±0.0000	0.2945±0.0000
rpoC1 - rpoB	intergenic region	0.2853±0.0125	0.2903±0.0000	0.2851±0.0126	0.2852±0.0126	0.2903±0.0000	0.2581±0.0000	0.2581±0.0000
atpH - atpI	intergenic region	0.2856±0.0085	0.3175±0.0085	0.2848±0.0067	0.2827±0.0024	0.3038±0.0023	0.3050±0.0000	0.2959±0.0000
petA - psbJ	intergenic region	0.2864±0.0031	0.2901±0.0108	0.2863±0.0028	0.2858±0.0016	0.2921±0.0043	0.2940±0.0000	0.2801±0.0000
cemA - petA	intergenic region	0.2868±0.0054	0.3121±0.0080	0.2861±0.0034	0.2860±0.0029	0.2881±0.0042	0.2977±0.0000	0.2740±0.0000
ycf3 - trnS-GGA	intergenic region	0.2874±0.0035	0.2845±0.0103	0.2875±0.0032	0.2883±0.0015	0.2786±0.0017	0.2876±0.0000	0.2955±0.0000
trnE-UUC - trnT-GGU	intergenic region	0.2880±0.0092	0.3059±0.0084	0.2875±0.0088	0.2897±0.0058	0.2660±0.0043	0.2816±0.0000	0.2768±0.0000
ycf4 - cemA	intergenic region	0.2889±0.0060	0.3187±0.0043	0.2881±0.0037	0.2882±0.0037	0.2890±0.0014	0.2806±0.0000	0.2791±0.0000
atpB - rbcL	intergenic region	0.2901±0.0021	0.2890±0.0017	0.2901±0.0021	0.2900±0.0017	0.2926±0.0018	0.2826±0.0000	0.2812±0.0000
trnL-UAA - trnF-GAA	intergenic region	0.2961±0.0062	0.2971±0.0043	0.2961±0.0062	0.2973±0.0041	0.2814±0.0037	0.3079±0.0000	0.3073±0.0000
psaJ - rpl33	intergenic region	0.2966±0.0041	0.2937±0.0030	0.2967±0.0041	0.2962±0.0037	0.3014±0.0054	0.2965±0.0000	0.2931±0.0000
psbE - petL	intergenic region	0.2976±0.0026	0.3003±0.0088	0.2975±0.0023	0.2974±0.0016	0.3004±0.0026	0.2845±0.0000	0.2916±0.0000
psbK - psbI	intergenic region	0.2980±0.0120	0.2801±0.0328	0.2985±0.0110	0.3019±0.0029	0.2641±0.0030	0.2851±0.0000	0.2974±0.0000
trnS-GCU - trnG-UCC	intergenic region	0.2985±0.0083	0.3184±0.0051	0.2980±0.0077	0.2990±0.0072	0.2917±0.0030	0.2713±0.0000	0.2896±0.0000
psaI - ycf4	intergenic region	0.3024±0.0066	0.3053±0.0044	0.3023±0.0067	0.3042±0.0036	0.2854±0.0038	0.2857±0.0000	0.2883±0.0000
ndhJ - ndhK	intergenic region	0.3053±0.0087	0.2933±0.0110	0.3056±0.0085	0.3081±0.0032	0.2808±0.0068	0.3016±0.0000	0.2966±0.0000
trnD-GUC - trnY-GUA	intergenic region	0.3068±0.0048	0.3193±0.0072	0.3065±0.0043	0.3058±0.0025	0.3147±0.0028	0.2870±0.0000	0.3259±0.0000
rps2 - rpoC2	intergenic region	0.3071±0.0066	0.3282±0.0108	0.3066±0.0056	0.3057±0.0030	0.3126±0.0041	0.2925±0.0000	0.3498±0.0000
psbM - trnD-GUC	intergenic region	0.3077±0.0032	0.3083±0.0067	0.3077±0.0031	0.3085±0.0017	0.3010±0.0017	0.3012±0.0000	0.2915±0.0000
rpl33 - rps18	intergenic region	0.3079±0.0225	0.3068±0.0129	0.3080±0.0227	0.3149±0.0041	0.2376±0.0188	0.2995±0.0000	0.2787±0.0000
psaA - ycf3	intergenic region	0.3108±0.0028	0.3141±0.0090	0.3107±0.0025	0.3103±0.0017	0.3149±0.0017	0.3235±0.0000	0.3031±0.0000
atpE - atpB	intergenic region	0.3149±0.0161	0.3182±0.0000	0.3148±0.0163	0.3191±0.0095	0.2727±0.0000	0.3182±0.0000	0.2727±0.0000
trnC-GCA - petN	intergenic region	0.3185±0.0051	0.3405±0.0058	0.3179±0.0037	0.3173±0.0028	0.3251±0.0037	0.3231±0.0000	0.3130±0.0000
rps18 - rpl20	intergenic region	0.3189±0.0058	0.3152±0.0180	0.3190±0.0054	0.3203±0.0037	0.3068±0.0021	0.3115±0.0000	0.3050±0.0000
psbT - psbN	intergenic region	0.3191±0.0247	0.3559±0.0078	0.3182±0.0243	0.3108±0.0030	0.3967±0.0070	0.3115±0.0000	0.3279±0.0000
trnS-UGA - psbZ	intergenic region	0.3192±0.0099	0.3270±0.0054	0.3190±0.0099	0.3218±0.0035	0.2901±0.0058	0.3297±0.0000	0.2949±0.0000
infA - rps8	intergenic region	0.3214±0.0085	0.3245±0.0075	0.3213±0.0085	0.3191±0.0031	0.3393±0.0164	0.3504±0.0000	0.3423±0.0000
rps14 - psaB	intergenic region	0.3223±0.0050	0.3249±0.0077	0.3222±0.0049	0.3220±0.0048	0.3221±0.0032	0.3359±0.0000	0.3333±0.0000
psbJ - psbL	intergenic region	0.3238±0.0070	0.3020±0.0235	0.3243±0.0054	0.3239±0.0048	0.3249±0.0016	0.3520±0.0000	0.3361±0.0000
psbB - psbT	intergenic region	0.3239±0.0053	0.3437±0.0107	0.3234±0.0041	0.3236±0.0041	0.3212±0.0031	0.3207±0.0000	0.3256±0.0000
trnL-UAG - ccsA	intergenic region	0.3269±0.0153	0.2979±0.0288	0.3277±0.0143	0.3300±0.0041	0.3076±0.0412	0.2809±0.0000	0.3253±0.0000
psbH - petB	intergenic region	0.3286±0.0056	0.3043±0.0135	0.3292±0.0036	0.3283±0.0020	0.3377±0.0052	0.3361±0.0000	0.3279±0.0000
rpl20 - rps12	intergenic region	0.3289±0.0041	0.3447±0.0069	0.3285±0.0032	0.3275±0.0008	0.3378±0.0009	0.3259±0.0000	0.3403±0.0000
ndhD - psaC	intergenic region	0.3367±0.0096	0.3387±0.0081	0.3366±0.0097	0.3345±0.0066	0.3589±0.0043	0.3178±0.0000	0.3554±0.0000
petG - trnW-CCA	intergenic region	0.3390±0.0097	0.3602±0.0093	0.3384±0.0091	0.3360±0.0048	0.3629±0.0000	0.3280±0.0000	0.3630±0.0000
psbC - trnS-UGA	intergenic region	0.3434±0.0078	0.3666±0.0210	0.3428±0.0063	0.3412±0.0032	0.3571±0.0038	0.3372±0.0000	0.3764±0.0000
rps7 - rps12	intergenic region	0.3466±0.0085	0.3333±0.0111	0.3469±0.0082	0.3451±0.0059	0.3650±0.0012	0.3333±0.0000	0.3654±0.0000
rps12 - rps7	intergenic region	0.3466±0.0085	0.3333±0.0111	0.3469±0.0082	0.3451±0.0059	0.3650±0.0012	0.3333±0.0000	0.3654±0.0000
trnfM-CAU - rps14	intergenic region	0.3523±0.0070	0.3429±0.0031	0.3526±0.0069	0.3520±0.0030	0.3644±0.0038	0.3522±0.0000	0.2976±0.0000
rpl23 - trnI-CAU	intergenic region	0.3575±0.0009	0.3556±0.0035	0.3576±0.0007	0.3575±0.0004	0.3576±0.0000	0.3636±0.0000	0.3576±0.0000
trnI-CAU - rpl23	intergenic region	0.3575±0.0009	0.3556±0.0035	0.3576±0.0007	0.3575±0.0004	0.3576±0.0000	0.3636±0.0000	0.3576±0.0000
trnL-CAA - ndhB	intergenic region	0.3586±0.0047	0.3803±0.0048	0.3581±0.0032	0.3579±0.0024	0.3596±0.0075	0.3616±0.0000	0.3641±0.0000
ndhB - trnL-CAA	intergenic region	0.3587±0.0048	0.3803±0.0048	0.3581±0.0033	0.3579±0.0024	0.3596±0.0075	0.3616±0.0000	0.3688±0.0000
trnI-CAU - ycf2	intergenic region	0.3635±0.0010	0.3636±0.0000	0.3635±0.0011	0.3636±0.0000	0.3636±0.0000	0.3523±0.0000	0.3636±0.0000
ycf2 - trnI-CAU	intergenic region	0.3635±0.0010	0.3636±0.0000	0.3635±0.0011	0.3636±0.0000	0.3636±0.0000	0.3523±0.0000	0.3636±0.0000
ndhB - rps7	intergenic region	0.3648±0.0029	0.3744±0.0183	0.3646±0.0007	0.3647±0.0001	0.3645±0.0000	0.3614±0.0000	0.3583±0.0000
rps7 - ndhB	intergenic region	0.3648±0.0029	0.3744±0.0183	0.3646±0.0007	0.3647±0.0001	0.3645±0.0000	0.3614±0.0000	0.3583±0.0000
trnN-GUU - ycf1-fragment	intergenic region	0.3667±0.0023	0.3792±0.0053	0.3663±0.0009	0.3662±0.0003	0.3672±0.0017	0.3650±0.0000	0.3731±0.0000
ycf1 - trnN-GUU	intergenic region	0.3667±0.0023	0.3792±0.0053	0.3663±0.0009	0.3662±0.0003	0.3672±0.0017	0.3650±0.0000	0.3731±0.0000
trnY-GUA - trnE-UUC	intergenic region	0.3758±0.0111	0.3729±0.0000	0.3759±0.0112	0.3724±0.0028	0.4068±0.0080	0.4237±0.0000	0.3898±0.0000
trnS-GGA - rps4	intergenic region	0.3929±0.0070	0.3764±0.0087	0.3933±0.0064	0.3948±0.0031	0.3859±0.0019	0.3505±0.0000	0.3591±0.0000
rps12 - trnV-GAC	intergenic region	0.3953±0.0013	0.3904±0.0044	0.3955±0.0008	0.3953±0.0007	0.3967±0.0005	0.3972±0.0000	0.3962±0.0000
trnV-GAC - rps12	intergenic region	0.3953±0.0013	0.3904±0.0044	0.3955±0.0008	0.3953±0.0007	0.3967±0.0005	0.3972±0.0000	0.3962±0.0000
rrn5 - trnR-ACG	intergenic region	0.3993±0.0083	0.4211±0.0033	0.3988±0.0077	0.3969±0.0052	0.4175±0.0024	0.3985±0.0000	0.4093±0.0000
trnR-ACG - rrn5	intergenic region	0.3994±0.0084	0.4211±0.0033	0.3988±0.0077	0.3969±0.0052	0.4175±0.0024	0.3985±0.0000	0.4125±0.0000
ycf2 - trnL - CAA	intergenic region	0.4082±0.0020	0.4151±0.0028	0.4080±0.0016	0.4082±0.0015	0.4066±0.0005	0.4030±0.0000	0.4063±0.0000
trnL-CAA - ycf2	intergenic region	0.4082±0.0020	0.4151±0.0028	0.4080±0.0016	0.4082±0.0016	0.4066±0.0005	0.4030±0.0000	0.4063±0.0000
psbL - psbF	intergenic region	0.4087±0.0041	0.4091±0.0000	0.4087±0.0042	0.4087±0.0044	0.4091±0.0000	0.4091±0.0000	0.4091±0.0000
rpoC2 - rpoC1	intergenic region	0.4126±0.0057	0.4060±0.0217	0.4127±0.0049	0.4135±0.0043	0.4068±0.0046	0.4011±0.0000	0.4011±0.0000
trnA-UGC - rrn23	intergenic region	0.4169±0.0014	0.4172±0.0000	0.4169±0.0014	0.4169±0.0012	0.4172±0.0000	0.4096±0.0000	0.4110±0.0000
rrn23 - trnA-UGC	intergenic region	0.4169±0.0014	0.4172±0.0000	0.4169±0.0014	0.4169±0.0012	0.4172±0.0000	0.4096±0.0000	0.4110±0.0000
trnN-GUU - trnR-ACG	intergenic region	0.4215±0.0020	0.4189±0.0068	0.4216±0.0018	0.4220±0.0011	0.4176±0.0021	0.4231±0.0000	0.4228±0.0000
trnR-ACG - trnN-GUU	intergenic region	0.4216±0.0020	0.4189±0.0068	0.4216±0.0018	0.4220±0.0011	0.4176±0.0021	0.4231±0.0000	0.4249±0.0000
psaB - psaA	intergenic region	0.4399±0.0011	0.4359±0.0071	0.4400±0.0000	0.4400±0.0000	0.4400±0.0000	0.4400±0.0000	0.4400±0.0000
rrn4 - rrn5	intergenic region	0.4456±0.0041	0.4451±0.0026	0.4456±0.0042	0.4447±0.0032	0.4546±0.0000	0.4550±0.0000	0.4466±0.0000
rrn5 - rrn4	intergenic region	0.4456±0.0041	0.4451±0.0026	0.4456±0.0042	0.4447±0.0032	0.4546±0.0000	0.4550±0.0000	0.4466±0.0000
trnV-GAC - rrn16	intergenic region	0.4490±0.0016	0.4435±0.0025	0.4491±0.0013	0.4492±0.0009	0.4493±0.0000	0.4405±0.0000	0.4449±0.0000
rrn16 - trnV-GAC	intergenic region	0.4490±0.0016	0.4435±0.0025	0.4491±0.0013	0.4492±0.0009	0.4493±0.0000	0.4405±0.0000	0.4449±0.0000
trnI-GAU - trnA-UGC	intergenic region	0.5000±0.0020	0.5052±0.0090	0.4999±0.0014	0.5000±0.0000	0.5000±0.0000	0.5000±0.0000	0.4844±0.0000
trnA-UGC - trnI-GAU	intergenic region	0.5000±0.0020	0.5052±0.0090	0.4999±0.0014	0.5000±0.0000	0.5000±0.0000	0.5000±0.0000	0.4844±0.0000
rrn16 - trnI-GAU	intergenic region	0.5108±0.0024	0.5235±0.0017	0.5105±0.0012	0.5101±0.0004	0.5132±0.0011	0.5152±0.0000	0.5169±0.0000
trnI-GAU - rrn16	intergenic region	0.5108±0.0024	0.5235±0.0017	0.5105±0.0012	0.5101±0.0004	0.5132±0.0011	0.5152±0.0000	0.5169±0.0000
rrn23 - rrn4	intergenic region	0.5607±0.0037	0.5748±0.0059	0.5604±0.0029	0.5612±0.0000	0.5510±0.0000	0.5612±0.0000	0.5612±0.0000
rrn4 - rrn23	intergenic region	0.5607±0.0037	0.5748±0.0059	0.5604±0.0029	0.5612±0.0000	0.5510±0.0000	0.5612±0.0000	0.5612±0.0000
psbF - psbE	intergenic region	0.7576±0.0625	0.7778±0.0000	0.7571±0.0632	0.7757±0.0151	0.5556±0.0000	0.7778±0.0000	0.7778±0.0000
Note: The minimum and maximum values were bolded for tRNA, rRNA, protein-coding regions and intergenic regions. The longest introns of the two rps12 genes were not included due to the special gene structure. The two copies of the genes distributed in IRs showed the same GC contents, we only showed one of them.

## Sheet: Supplementary Table 27
Supplementary Table 27 The genetic clusters identified by present plastome data and nuclear SSR markers
Species	Code	Geographic distribution	Genetic clusters in this studya	Genetic clusters in studies based on nuclear SSR markersb
Subfamily Amygdaloideae
Tribe Amygdaleae
Prunus subg. Cerasus (True cherry)
Prunus pseudocerasus
Cultivated Chinese cherry	CBJ3	Yungui Plateau (YGP)	AI1	Admixed accession
	CMZ5	YGP	AI1	Clade I
	CQX14	Longmenshan Fault Zones (LFZ)	AI1	na
	CPZ2	LFZ	AI1	Clade I
	CSM139	LFZ	AI1	Clade I
	CXC1	LFZ	AI1	Clade I
	CYA	LFZ	AI1	na
	CHaZ310	Qinling Mountains (QLM)	AI1	Clade II
	CZaZ1	North China Plain and East China Plain (NEP)	AI1	Clade II
	CLuY1	NEP	AI1	Admixed accession
	CAQ384	NEP	AI1	Admixed accession
Wild Chinese cherry
	WBZ3	Border area of LFZ and QLM	AI4	Clade III
	WBZ4	Border area of LFZ and QLM	AI4	Admixed accession
	WBZ5	Border area of LFZ and QLM	AI4	Admixed accession
	WGX12	LFZ	AI1	Clade III
	WGX18	LFZ	AI2	Clade III
	WQX6	LFZ	AI2	Clade III
	WQX9	LFZ	AI1	Clade III
	WQX10	LFZ	AI1	Clade III
	WSM131	LFZ	AI1	Clade III
	WSM137	LFZ	AI2	Clade III
	WSM140	LFZ	AI1	Clade III
	WTL2	LFZ	AI2	Clade III
	WTL4	LFZ	AI1	Clade III
	WTL5	LFZ	AI2	Clade III
	WTL7	LFZ	AI4	Clade III
	WTL9	LFZ	AI1	Clade III
	WZGM8	LFZ	AI1	na
	WZGM20	LFZ	AI4	na
	WZGM23	LFZ	AI4	na
	WML21	LFZ	AI1	na
	WNG2	QLM	AI1	Clade III
	WNG9	QLM	AI2	Clade III
	WNG10	QLM	AI2	Clade III
Prunus avium	‘Black Tartarian’	European cherry resources (ECR)	AI3	na
	‘Van’	ECR	AI3	na
	Mazzard	ECR	AI3	na
Prunus fruticosa	ZFI3	ECR	AI3	na
Prunus cerasus × Prunus canescens	‘Gisela5’	ECR	AI3	na
Prunus mahaleb	ZFI4	-	AI6	na
Prunus pusilliflora	YAU	YGP	AI4	Clade IV
Prunus serrulata	KM2	YGP	AI2	Clade IV
	ZY4	YGP	AI1	Clade III
	ZY4-1	YGP	AI1	Clade III
	ZY5	YGP	AI2	Clade III
	YYT1	-	AI2	na
Prunus serrulata var. lannesiana	YYT2	-	AI2	na
Prunus conradinae	LD2	LFZ	AI2	na
	LD7	LFZ	AI2	Clade IV
	LD9	LFZ	AI4	Clade IV
	LD11	LFZ	AI2	Clade IV
	HaZ309	QLM	AI2	na
	HaZ314	QLM	AI2	Clade IV
	QLM2	QLM	AI2	na
	QLM10	QLM	AI4	Clade IV
	BHH294	YGP	AI2	na
	LGS4	YGP	AI2	Clade IV
	KIB1	-	AI1	Clade IV
	KM1	YGP	AI1	Clade IV
	PD1-1	YGP	AI1	Clade III
	PD2	YGP	AI2	Clade III
	SP6	YGP	AI2	Clade IV
Prunus cerasoides	BHH4	YGP	AI2	Clade IV
	KIB2	-	AI1	Clade IV
	KIB3	-	AI4	Clade IV
Prunus cerasoides var. rubea	KIB4	-	AI1	Clade IV
Prunus campanulata	KIB5	-	AI4	Clade IV
Prunus clarofolia	ML25	LFZ	AI1	Clade IV
	ML26	LFZ	AI1	Clade IV
	KIB6	-	AI1	Clade IV
Prunus szechuanica	EMM10	LFZ	AI4	Clade IV
	JJM7	LFZ	AI2	Clade IV
	QLM12	QLM	AI4	Clade IV
Prunus duclouxii	QLM8	QLM	AI2	Clade IV
Prunus pleiocerasus	ML15	LFZ	AI4	Clade IV
Prunus trichostoma	ML5	LFZ	AI4	na
Prunus scopulorum	ML106	LFZ	AI1	Clade III
Prunus crataegifolia	JJM1	LFZ	AI4	Clade IV
Prunus tatsienensis	KD6	LFZ	AI4	na
Prunus yedoensis	YYT3	-	AI4	na
Prunus discoidea	EMM1	LFZ	AI4	Clade IV
	EMM2	LFZ	AI4	Clade IV
	EMM4	LFZ	AI4	Clade IV
Prunus dolichadenia	JJM2	LFZ	AI4	Clade IV
Prunus sp. 1	ZGM17	LFZ	AI4	Clade IV
Prunus sp. 2	QLM13	QLM	AI4	na
Note: a: genetic clusters identified according to the results of phylogenetic trees under the PWGD. b: genetic clusters identified based on our reported molecular study using nuclear SSR markers (Zhang et al., 2018). na: accessions that were not available in study due to missingdata. Cultivated and wild Chinese cherries that were classified into the same cluster (AI1) were marked with green color.
